# Supplementary material for: C–H bond activation via concerted metalation–deprotonation at a palladium( iii ) center
Source: Royal Society of Chemistry journal article supplement (doi:10.1039/d3sc00034f), 2023-01-01
Supplement: d3sc00034f1.pdf [file d3sc00034f1.pdf]

**Supporting Information**

**C-H Bond Activation via Concerted Metalation-Deprotonation  
at a Palladium(III) Center**

Bailey Bouley,<sup>1</sup> Fengzhi Tang,<sup>2</sup> Dae Young Bae,<sup>1</sup> and Liviu M. Mirica<sup>1,\*</sup>

<sup>1</sup> Department of Chemistry, University of Illinois at Urbana-Champaign, 505 S Mathews Ave, Urbana, IL 61801-3617,

<sup>2</sup> Department of Chemistry, Washington University, One Brookings Drive, St. Louis, MO 63130-4899.

**Table of Contents**

|                                                                                                                                         |     |
|-----------------------------------------------------------------------------------------------------------------------------------------|-----|
| <b>I. General Specifications</b> .....                                                                                                  | S2  |
| <b>II. Synthesis of Pd Complexes</b> .....                                                                                              | S3  |
| <b>III. C-H activation studies at Pd<sup>III</sup> species</b> .....                                                                    | S13 |
| <b>IV. CV, UV-Vis, and EPR spectra</b> .....                                                                                            | S32 |
| <b>V. Aerobic oxidation of complexes 1 and 2</b> .....                                                                                  | S36 |
| <b>VI. ORTEP and space-filling models of [1], [1<sup>+</sup>], [2], [2<sup>+</sup>] and [2<sup>2+</sup>]</b> .....                      | S38 |
| <b>VII. X-ray crystallographic data of 1, 2, [2<sup>+</sup>]PF<sub>6</sub>, and [2<sup>2+</sup>](ClO<sub>4</sub>)<sub>2</sub></b> ..... | S40 |
| <b>VIII. Computational Details</b> .....                                                                                                | S60 |
| <b>IX. References</b> .....                                                                                                             | S79 |

## I. General Specifications

All operations were performed under a nitrogen atmosphere using standard Schlenk and glove box techniques if not indicated otherwise. All reagents for which the syntheses are not given were purchased from Sigma-Aldrich, Acros, STREM, or Pressure Chemical and were used as received without further purification. Solvents were purified prior to use by passing through a column of activated alumina using an MBRAUN SPS. N,N'-methyl-2,11-diaza[3,3](2,6)pyridinophane (<sup>Me</sup>N4),<sup>1</sup> neophyl-Cl-*d*<sub>5</sub>,<sup>2</sup> (COD)Pd(neophyl)Cl, (COD)Pd(neophyl-*d*<sub>5</sub>)Cl,<sup>3</sup> (COD)Pd(cycloneophyl)<sup>4</sup>, and AgOPiv<sup>5</sup> were prepared according to literature procedures. <sup>1</sup>H NMR spectra were obtained on a Varian Mercury-300 spectrometer (300.121 MHz) or a Bruker Ascend-600 spectrometer (600.13 MHz). <sup>13</sup>C NMR spectra were obtained on a Bruker Ascend-600 spectrometer (150.92 MHz). Cyclic voltammetry (CV) studies were performed with a BASi EC Epsilon electrochemical workstation. The reference electrodes were calibrated against ferrocene at the end of each CV measurement. Chemical shifts are reported in parts per million (ppm) with residual solvent resonance peaks as internal references.<sup>6</sup> Abbreviations for the multiplicity of NMR signals are singlet (s), doublet (d), triplet (t), quartet (q), septet (sep), multiplet (m), broad resonance (br). UV-visible spectra were recorded on a Varian Cary 50 Bio spectrophotometer and are reported as λ<sub>max</sub>, nm (λ, M<sup>-1</sup>cm<sup>-1</sup>). EPR spectra were recorded on a JEOL JES-FA X-band (9.2 GHz) EPR spectrometer in PrCN-MeCN (3:1) at 77 K. ESI-MS experiments were performed using a linear quadrupole ion trap Fourier transform ion cyclotron resonance mass spectrometer (LTQ-FTMS, Thermo, San Jose, CA) or a Bruker Maxis Q-TOF mass spectrometer with an electrospray ionization source. ESI mass-spectrometry was provided by the Washington University Mass Spectrometry Resource. Elemental analyses were carried out by the Intertek Pharmaceutical Services.

## II. Synthesis of Pd Complexes

### (<sup>Me</sup>N<sub>4</sub>)Pd<sup>II</sup>(neophyl)Cl (**1**)

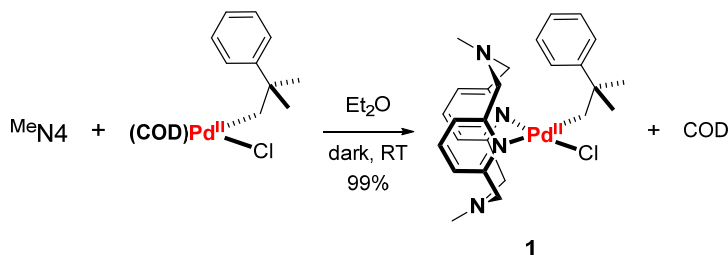

Under nitrogen, Me<sub>4</sub>N<sup>+</sup> (59.6 mg, 0.222 mmol) and (COD)Pd<sup>II</sup>(neophyl)Cl (85.2 mg, 0.222 mmol) were loaded in a round bottom flask. Then, anhydrous diethyl ether (15 mL) was added to form a yellowish suspension. This suspension was allowed to stir for two days in the absence of light. The generated pale-yellow precipitate was filtered off, washed with ether and pentane, and dried *in vacuo*. The product (Me<sub>4</sub>N)<sup>+</sup>(neophyl)Pd<sup>II</sup>Cl<sup>-</sup> was isolated as a pale yellow solid. Yield: 120 mg, 99 % yield.

Anal. Found: C, 57.22; H, 5.80; N, 10.84; Calcd for (Me<sub>4</sub>N)<sup>+</sup>(neophyl)Pd<sup>II</sup>Cl<sup>-</sup> (C<sub>26</sub>H<sub>33</sub>ClN<sub>4</sub>Pd) : C, 57.46; H, 6.12; N, 10.31.

<sup>1</sup>H NMR (600 MHz, CD<sub>3</sub>CN) δ 7.47 (br, 1H, py-H), 7.41 (br, 1H, py-H), 7.10 (d, *J* = 7.7 Hz, 2H, ph-H), 6.99 (br, 2H, py-H), 6.95 – 6.85 (m, 5H, py-H and ph-H), 6.02 (d, *J* = 12.2 Hz, 2H, -CH<sub>2</sub>-), 5.49 (d, *J* = 13.0 Hz, 2H, -CH<sub>2</sub>-), 4.06 (d, *J* = 13.4 Hz, 2H, -CH<sub>2</sub>-), 3.78 (d, *J* = 13.8 Hz, 2H, -CH<sub>2</sub>-), 2.45 (s, 2H, Pd-CH<sub>2</sub>), 2.16 (s, 6H, N-CH<sub>3</sub>), 1.32 (s, 6H, C(CH<sub>3</sub>)<sub>2</sub>).

<sup>1</sup>H NMR (600 MHz, CD<sub>2</sub>Cl<sub>2</sub>) δ 7.38 (br, 1H, py-H), 7.34 (br, 1H, py-H), 7.07 (d, *J* = 6.1 Hz, 2H), 6.95 – 6.83 (m, 5H, py-H and ph-H), 6.78 (br, 2H), 6.11 (br, 2H, -CH<sub>2</sub>-), 5.57 (br, 2H, -CH<sub>2</sub>-), 4.03 (br, 2H, -CH<sub>2</sub>-), 3.74 (br, 2H, -CH<sub>2</sub>-), 2.50 (s, 2H, Pd-CH<sub>2</sub>), 2.19 (s, 6H, N-CH<sub>3</sub>), 1.37 (s, 6H, C(CH<sub>3</sub>)<sub>2</sub>).

<sup>13</sup>C NMR (151 MHz, CD<sub>2</sub>Cl<sub>2</sub>) δ 159.10, 157.35, 151.44, 136.77, 136.35, 127.79, 126.04, 124.90, 124.73, 66.32, 63.69, 41.46, 39.65, 32.66, 26.98.

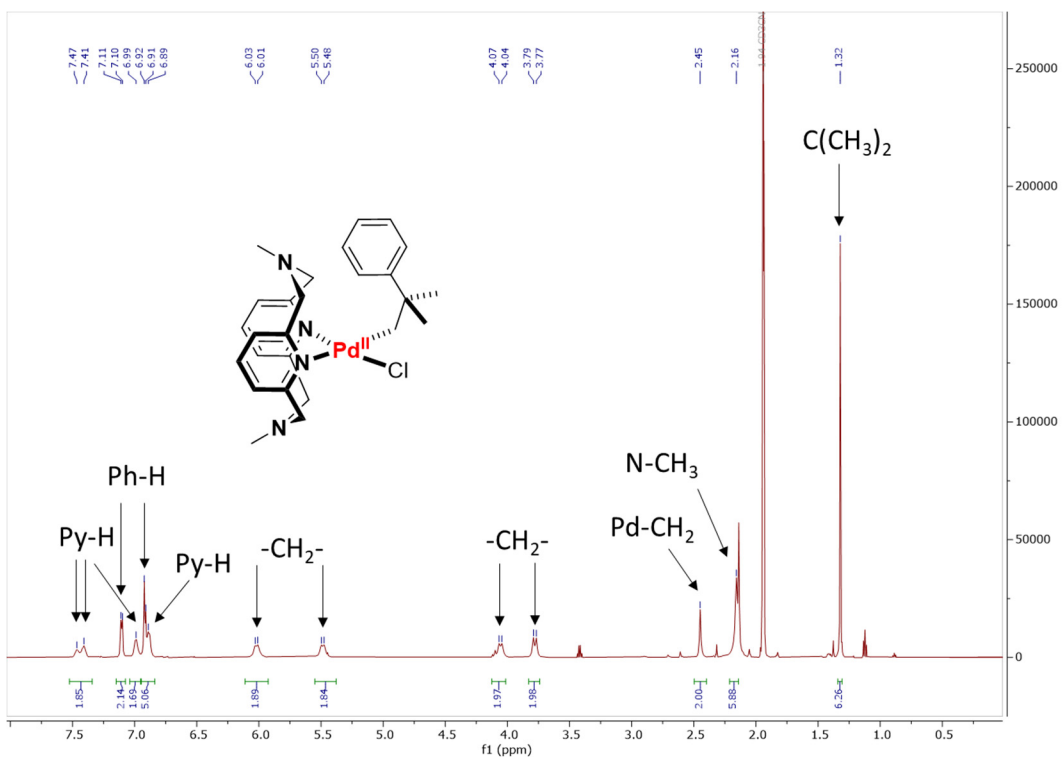

Figure S1.  $^1\text{H}$  NMR spectrum of **1** in  $\text{CD}_3\text{CN}$ .

$(^{\text{Me}}\text{N4})\text{Pd}^{\text{II}}(\text{neophyl-}d_5)\text{Cl}$  (**1-}d\_5**) was synthesized by reacting  $^{\text{Me}}\text{N4}$  (39.6 mg, 0.15 mmol) with 1 equiv. of  $(\text{COD})\text{Pd}^{\text{II}}(\text{neophyl-}d_5)$  (57.3 mg, 0.15 mmol) by a similar procedure. Yield: 72.8 mg, 90%.

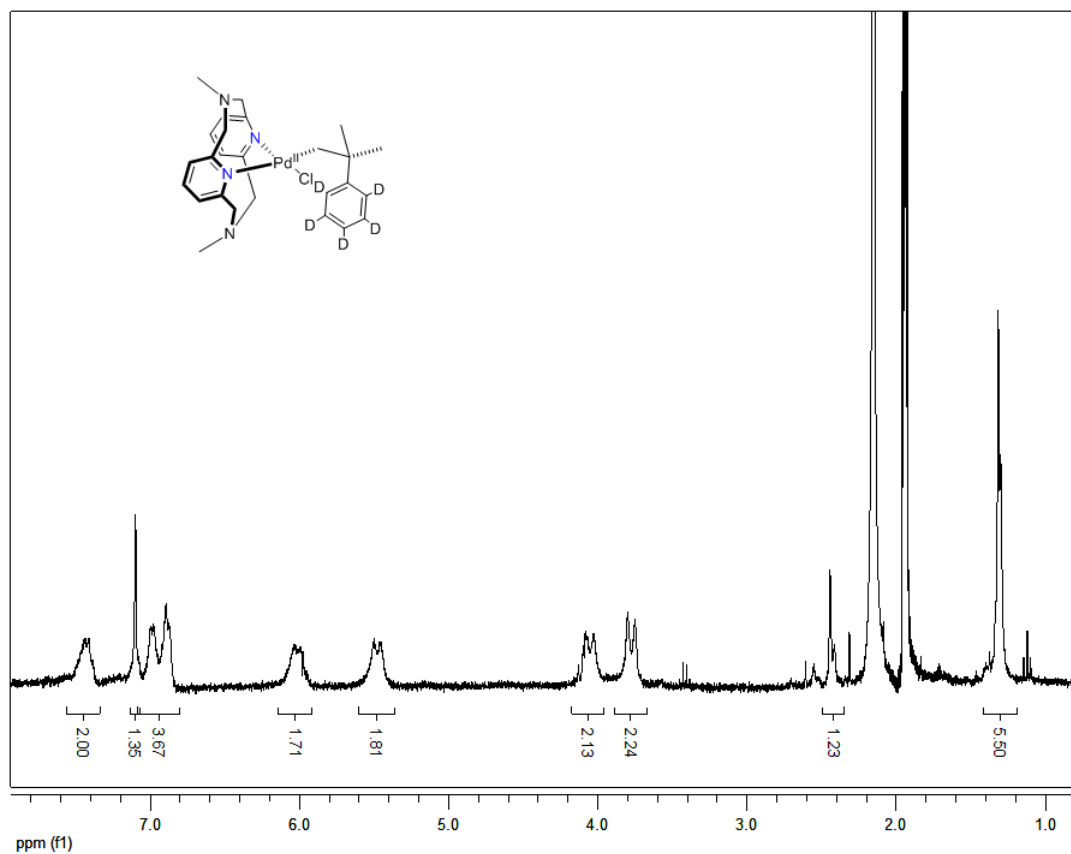

Figure S2. <sup>1</sup>H NMR spectrum of **1-d<sub>5</sub>** in CD<sub>3</sub>CN. Note: the slightly lower integration for the methylene peak (2.45 ppm) and methyl peak (1.32 ppm) of the neophyl ligand is due to the integration of deuterium during the synthesis of (COD)Pd(neophyl-d<sub>5</sub>)Cl.

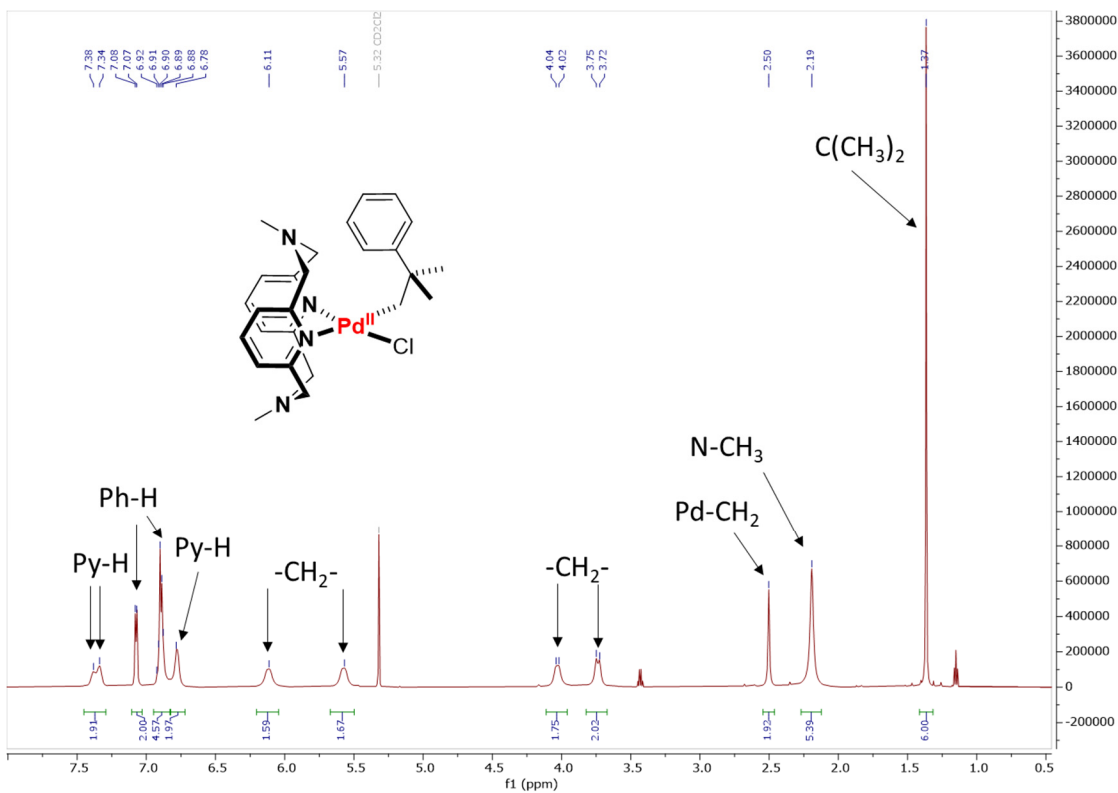

Figure S3. <sup>1</sup>H NMR of **1** in CD<sub>2</sub>Cl<sub>2</sub>.

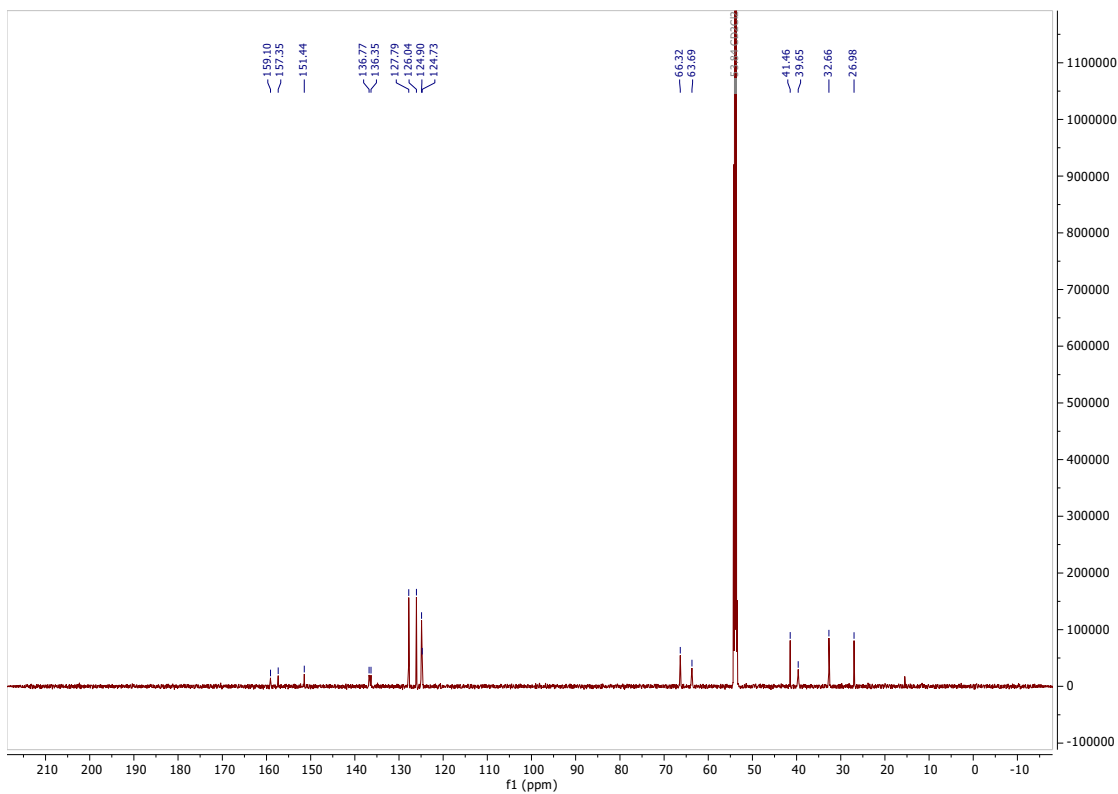

Figure S4. <sup>13</sup>C NMR of **1** in CD<sub>2</sub>Cl<sub>2</sub>.

**(<sup>Me</sup>N<sub>4</sub>)Pd<sup>II</sup>(cycloneophyl) (2)**

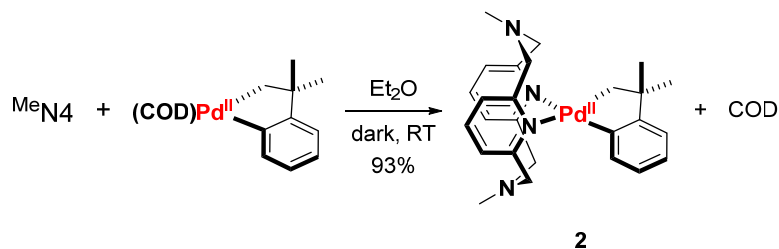

Under nitrogen,  $\text{MeN}_4$  (62.7 mg, 0.234 mmol) and  $(\text{COD})\text{Pd}^{\text{II}}(\text{cycloneophyl})$  (81.0 mg, 0.234 mmol) were loaded in a round bottom flask. Then anhydrous diethyl ether (15 mL) was added to form a white suspension. This suspension was allowed to stir for two days in the absence of light. Then, the generated white precipitate was filtered off, washed with ether and pentane, and dried *in vacuo*. The product  $(\text{MeN}_4)\text{Pd}^{\text{II}}(\text{cycloneophyl})$  was isolated as a white solid. Yield: 110 mg, 93 % yield.

Anal. Found: C, 61.22; H, 5.80; N, 10.84; Calcd for  $(\text{MeN}_4)\text{Pd}^{\text{II}}(\text{cycloneophyl})$  ( $\text{C}_{26}\text{H}_{32}\text{N}_4\text{Pd}$ ) : C, 61.60; H, 6.36; N, 11.05. Note: This compound is very unstable, undergoes thermal decomposition at room temperature.

$^1\text{H}$  NMR (300MHz,  $\text{CD}_3\text{CN}$ ),  $\delta$ : 7.55 (m, 2H, py-H), 7.10 (m, 4H, py-H), 6.74 (m, 2H, Ph-H), 6.52 (m, 2H, Ph-H), 5.98 (d, 4H,  $J = 12.9$  Hz,  $-\text{CH}_2-$ ), 4.11 (d, 4H,  $J = 13.5$  Hz,  $-\text{CH}_2-$ ), 2.32 (s, 6H, N- $\text{CH}_3$ ), 2.05 (s, 2H, Pd- $\text{CH}_2$ ), 1.38 (s, 6H,  $\text{CH}_3$ ).

$^{13}\text{C}$  NMR (151 MHz,  $\text{CD}_3\text{CN}$ )  $\delta$  168.68, 160.61, 158.59, 158.29, 137.02, 135.95, 125.52, 125.36, 124.35, 123.21, 122.59, 64.39, 49.03, 40.24, 39.25, 34.11.

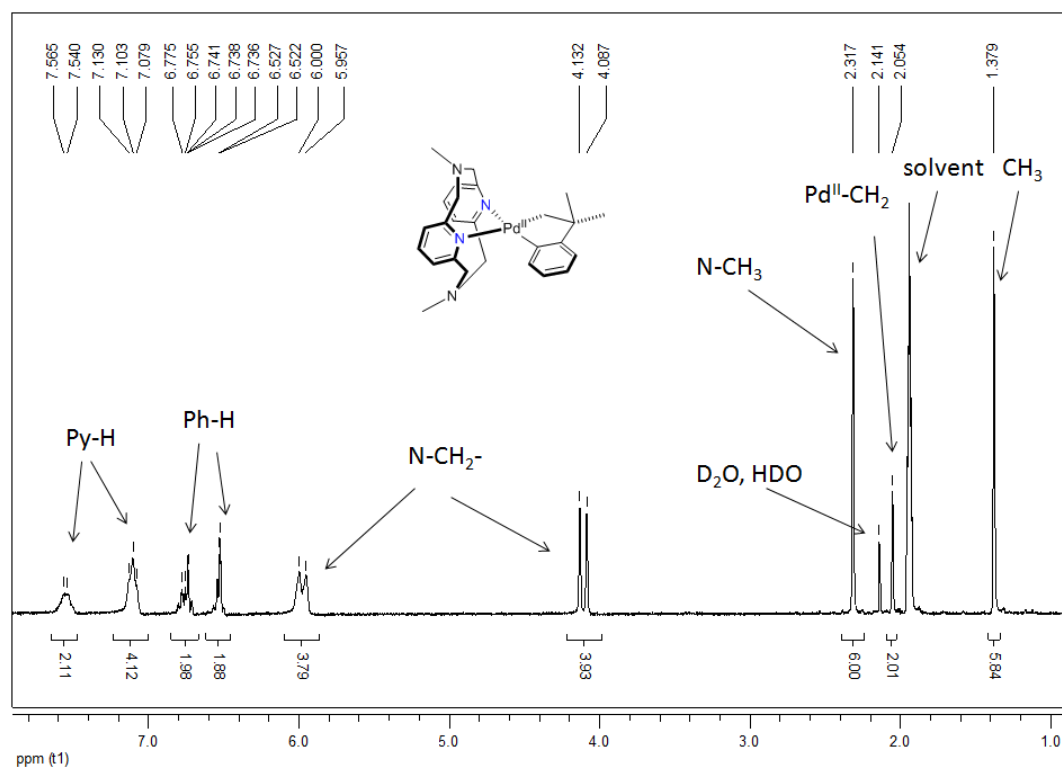

Figure S5.  $^1\text{H}$  NMR spectrum of **2** in  $\text{CD}_3\text{CN}$ .

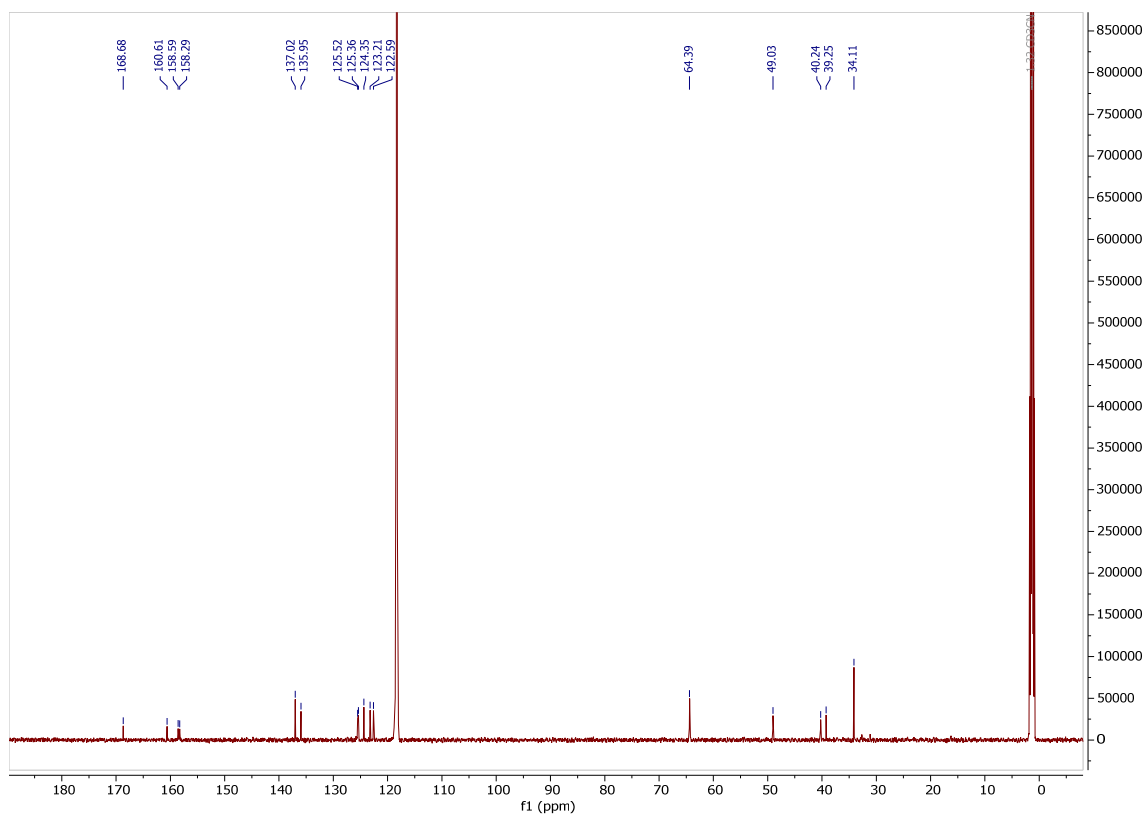

Figure S6.  $^{13}\text{C}$  NMR of **2** in  $\text{CD}_3\text{CN}$ .



**$[(^{\text{Me}}\text{N}_4)\text{Pd}^{\text{III}}(\text{neophyl})\text{Cl}] ([1^+])$**

In a  $\text{N}_2$  filled glove box, complex **1** (27.2 mg, 0.05 mmol) and 1 equiv. of  $\text{FcPF}_6$  (16.6 mg, 0.05 mmol) were mixed in MeCN (5 mL) for 30 min. Then the dark purple solution was concentrated to about 2 mL, washed with pentane (3 x 4 mL), and dried completely under vacuum. Yield: 32 mg, 99 %. For crystallization, the dark purplish residue was re-dissolved in THF (2 mL), and to this solution, 4 equiv. of  $\text{LiClO}_4$  (21.2 mg, 0.2 mmol) was added, and the mixture was filtered. Diffusion of diethyl ether at  $-35\text{ }^\circ\text{C}$  yielded dark purple crystals after a couple of days. Those crystals were isolated, washed with ether and pentane, and dried under high vacuum. Yield: 15.2 mg, 47 %.

EA analysis. Anal. Found: C, 40.21; H, 4.57; N, 6.46; Calcd for  $[(^{\text{Me}}\text{N}_4)\text{Pd}^{\text{III}}(\text{neophyl})\text{Cl}]\text{ClO}_4 \cdot \text{LiClO}_4 \cdot 2\text{H}_2\text{O}$ : ( $\text{C}_{26}\text{H}_{37}\text{N}_4\text{Cl}_3\text{O}_{10}\text{LiPd}$ ): C, 39.76; H, 4.75; N, 7.13.

UV-Vis: 625 nm ( $540\text{ M}^{-1}\text{cm}^{-1}$ ), 494 nm ( $440\text{ M}^{-1}\text{cm}^{-1}$ ), 324 nm ( $4750\text{ M}^{-1}\text{cm}^{-1}$ ).

ESI-MS of solution of  $[(^{\text{Me}}\text{N}_4)\text{Pd}^{\text{III}}(\text{neophyl})\text{Cl}]^+$  in MeCN, m/z 542.1421; calculated for  $[\text{C}_{18}\text{H}_{24}\text{N}_6\text{PdO}_4]^+$  542.1429.

**$[(^{13}\text{C}_4\text{N}_4)\text{Pd}^{\text{III}}(\text{cycloneophyl})]\text{ClO}_4$  ( $[\text{ClO}_4]^-$ )**

In a  $\text{N}_2$  filled glove box, complex **2** (10.0 mg, 0.02 mmol) and 1 equiv. of  $\text{FcPF}_6$  (6.5 mg, 0.02 mmol) were mixed in MeCN (3 mL) for 30 min. Then the dark green solution was concentrated to about 1 mL and washed with pentane (3 x 3 mL). For crystallization, 4 equiv. of  $\text{LiClO}_4$  (8.5 mg, 0.02 mmol) was added and the mixture was filtered. Diffusion with diethyl ether at  $-35^\circ\text{C}$  yielded dark green crystals after a couple of days. Those crystals were isolated, washed with ether and pentane, and dried under high vacuum. Yield: 4.2 mg, 35 %.

EA analysis. Anal. Found: C, 51.78; H, 5.66; N, 8.99; Calcd for  $[(^{13}\text{C}_4\text{N}_4)\text{Pd}^{\text{III}}(\text{cycloneophyl})]\text{ClO}_4$ : ( $\text{C}_{26}\text{H}_{32}\text{N}_4\text{ClO}_4\text{Pd}$ ): C, 51.49; H, 5.32; N, 9.24.

UV-Vis: 675 nm ( $425 \text{ M}^{-1}\text{cm}^{-1}$ ), 500 nm (shoulder,  $520 \text{ M}^{-1}\text{cm}^{-1}$ ), 335 nm ( $2800 \text{ M}^{-1}\text{cm}^{-1}$ ).

ESI-MS of solution of  $[(^{13}\text{C}_4\text{N}_4)\text{Pd}^{\text{III}}(\text{cycloneophyl})]^+$  in MeCN,  $m/z$  506.1641; calculated for  $[\text{C}_{18}\text{H}_{24}\text{N}_6\text{PdO}_4]^+$  506.1642.

**$[(^{13}\text{C}_4\text{N}_4)\text{Pd}^{\text{IV}}(\text{cycloneophyl})](\text{ClO}_4)_2$  ( $[\text{ClO}_4]^-$ )<sub>2</sub>**

In a  $\text{N}_2$  filled glove box, complex **2** (15.0 mg, 0.03 mmol) and 2 equiv. of  $\text{FcPF}_6$  (19.6 mg, 0.06 mmol) were mixed in MeCN (3 mL) for 30 min. The resulting orange solution was concentrated to about 1 mL and washed with pentane (3 x 3 mL). For crystallization, 4 equiv. of  $\text{LiClO}_4$  (12.8 mg, 0.12 mmol) was added, and the mixture was filtered. Diffusion of diethyl ether at  $-35^\circ\text{C}$  yielded orange crystals after a couple of days. Those crystals were isolated, washed with ether and pentane, and dried under high vacuum. Yield: 14.5 mg, 68 %.

EA analysis. Anal. Found: C, 44.12; H, 4.87; N, 7.45; Calcd for  $[(^{13}\text{C}_4\text{N}_4)\text{Pd}^{\text{IV}}(\text{cycloneophyl})](\text{ClO}_4)_2$ : ( $\text{C}_{26}\text{H}_{32}\text{N}_4\text{O}_8\text{Cl}_2\text{Pd}$ ): C, 44.24; H, 4.57; N, 7.94.

ESI-MS of solution of  $[(^{13}\text{C}_4\text{N}_4)\text{Pd}^{\text{IV}}(\text{cycloneophyl})]^{2+}$  in MeCN,  $m/z$  253.0835; calculated for  $[\text{C}_{18}\text{H}_{24}\text{N}_6\text{PdO}_4]^+$  253.0837.

$^1\text{H}$  NMR (300MHz,  $\text{CD}_3\text{CN}$ ),  $\delta$ : 7.99 (t, 1H,  $J = 7.8$  Hz, py-H), 7.93 (t, 1H,  $J = 7.8$  Hz, py-H), 7.49 (d, 2H,  $J = 7.8$  Hz, py-H), 7.40 (d, 2H,  $J = 7.8$  Hz, py-H), 7.28 (m, 2H, Ph-H), 7.02 (d, 2H,  $J = 3.0$  Hz Ph-H), 5.28 (d, 2H,  $J = 16.2$  Hz,  $-\text{CH}_2-$ ), 5.02 (d, 2H,  $J = 16.2$  Hz,  $-\text{CH}_2-$ ), 4.57 (d, 2H,  $J = 16.2$  Hz,  $-\text{CH}_2-$ ), 4.50 (d, 2H,  $J = 16.2$  Hz,  $-\text{CH}_2-$ ), 4.31 (s, 2H, Pd- $\text{CH}_2$ ), 2.86 (s, 6H, N- $\text{CH}_3$ ), 1.63 (s, 6H,  $\text{CH}_3$ ).

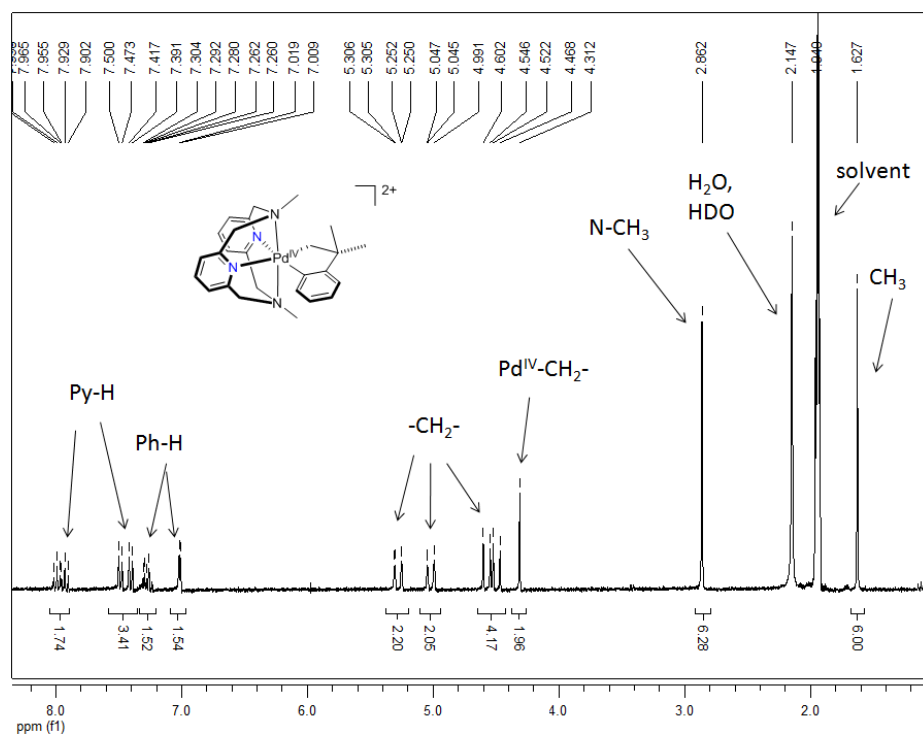

Figure S7.  $^1\text{H}$  NMR spectrum of  $[\mathbf{2}^{2+}](\text{ClO}_4)_2$  in  $\text{CD}_3\text{CN}$ .

### Attempts of preparing $[(\text{MeN}_4)\text{Pd}^{\text{IV}}(\text{neophyl})\text{Cl}](\text{ClO}_4)_2$

In a  $\text{N}_2$  filled glove box, complex **1** (22.8 mg, 0.04 mmol) and 2 equiv. of  $\text{NOBF}_4$  (9.8 mg, 0.08 mmol) were mixed in  $\text{CD}_3\text{CN}$  (1 mL). While an NMR spectrum of the resulting  $\text{Pd}^{\text{IV}}$  species could be obtained, the complex was not stable for long periods of time and could not be isolated. Alternatively, the isolated complex  $[(\text{MeN}_4)\text{Pd}^{\text{III}}(\text{neophyl})\text{Cl}]\text{ClO}_4$  could be used and addition of 1 equiv. of  $\text{NOBF}_4$  in  $\text{CD}_3\text{CN}$  (1 mL) generated an identical NMR spectrum.

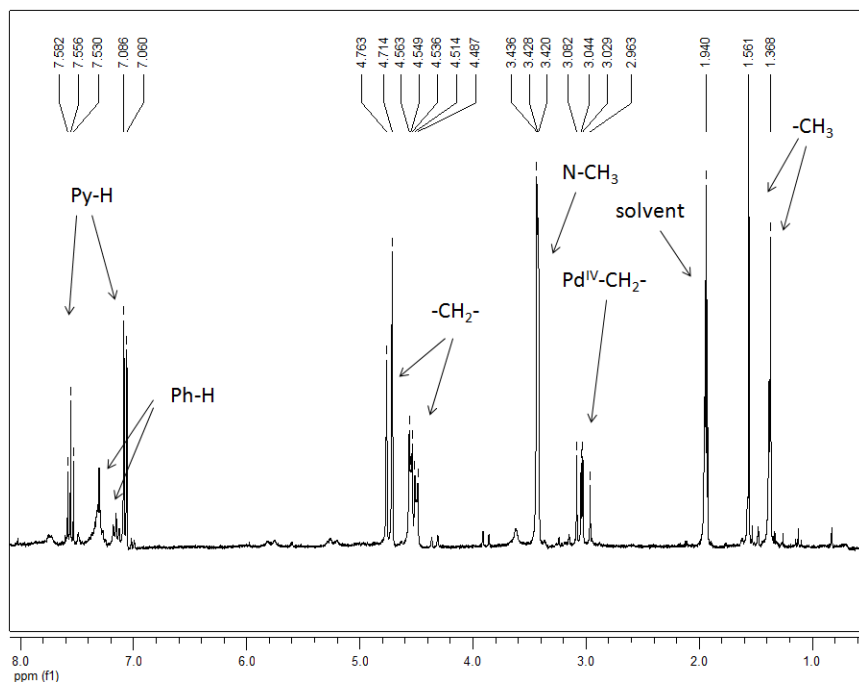

Figure S8.  $^1\text{H}$  NMR spectrum of mixture of complex **1** and 2 equiv. of  $\text{NOBF}_4$  in  $\text{CD}_3\text{CN}$  after 30 min.

### III. C-H activation studies at Pd<sup>III</sup> species

#### UV-Vis studies

In a 20 mL vial, **1**<sup>+</sup> (5.4 mg, .008 mmol) was dissolved in 6 mL MeCN to which 1 equiv. of AgOAc (1.3 mg, 0.008 mmol) was added while stirring. At each time point, 500  $\mu$ L of the solution was removed and filtered through a syringe filter to remove precipitated silver chloride into a 1 mL, 1 cm path length cuvette for UV-Vis analysis. The transformation of **1**<sup>+</sup> to **2**<sup>+</sup> was monitored by the disappearance of the band at 625 nm and the appearance of the band at 675 nm corresponding to the formation of **2**<sup>+</sup>. The reaction was complete after 3 hours with no more change in the intensity of the 675 nm band. Yield: 44%.

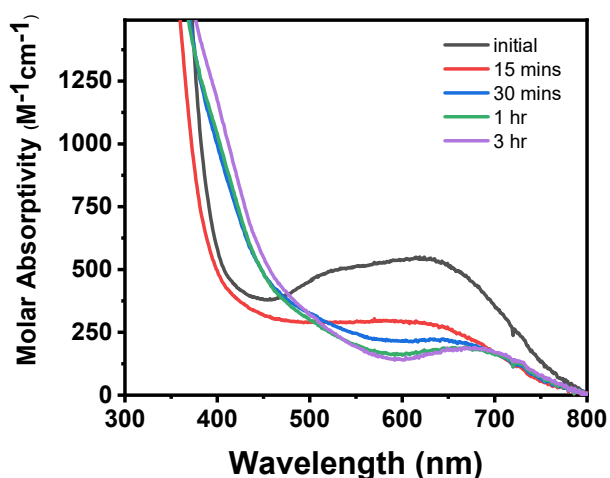

Figure S9. UV-Vis spectra showing the transition of **1**<sup>+</sup> to **2**<sup>+</sup> in the presence of 1 equiv. of AgOAc.

#### EPR studies

In a 7.0 mL vial equipped with a magnetic stir bar and a Teflon-lined cap, complex **1** (5.4 mg, 0.01 mmol) and 1 equiv. of FcPF<sub>6</sub> (3.3 mg, 0.01 mmol) were mixed in MeCN (2.5 mL) and stirred for 15 min to make a 4.0 mM [**1**<sup>+</sup>]PF<sub>6</sub> solution in situ. Then, a 100  $\mu$ L aliquot of the reaction mixture was taken by pipette and diluted 4 times with PrCN (300  $\mu$ L). This mixture was transferred to an EPR tube and frozen with liquid nitrogen immediately for EPR measurement. To the remaining reaction mixture, 1 equiv. of AgOAc (1.7 mg, 0.01 mmol) was added and reaction was stirred rapidly. At time points 1 min, 5 min, 10 min, 15 min, 20 min, 30 min, 50 min, 110 min, 280 min, and 460 min, a 100  $\mu$ L aliquot of the reaction mixture was taken by pipette, diluted 4 times with PrCN (300  $\mu$ L), frozen by liquid nitrogen, and tracked by EPR spectroscopy.

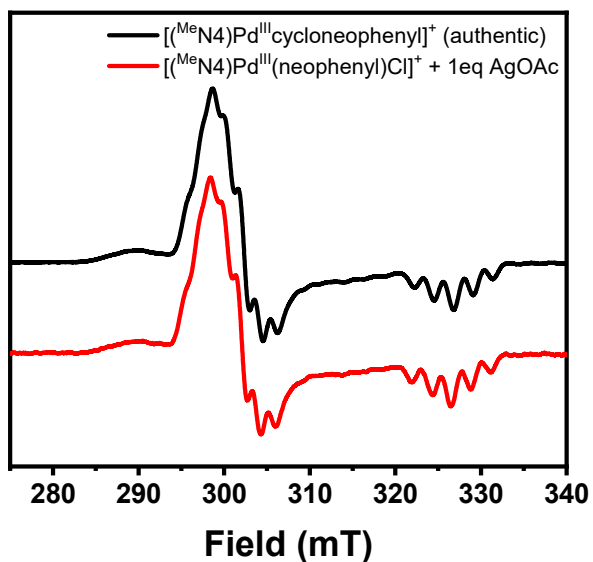

Figure S10. EPR spectra of the independently synthesized  $2^+$  and C-H activation product at  $\text{Pd}^{\text{III}}$  center of  $1^+$  promoted by AgOAc.

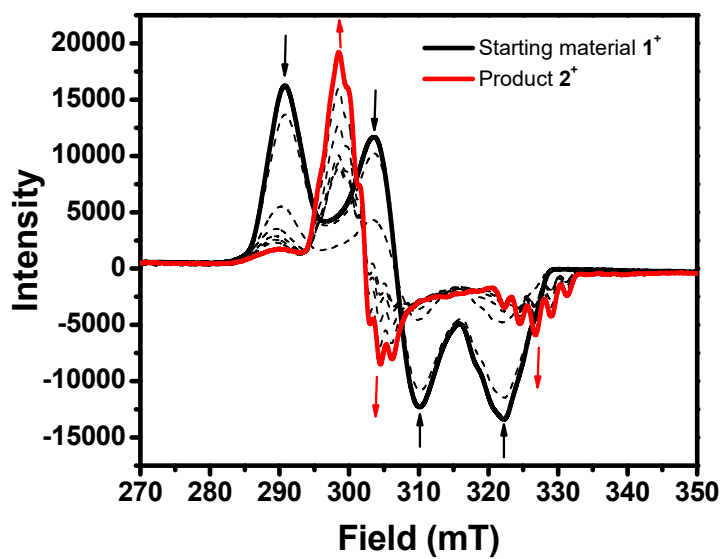

Figure S11. EPR spectra of the reaction mixture of  $1^+$  and 1 equiv. of AgOAc in MeCN at room temperature.

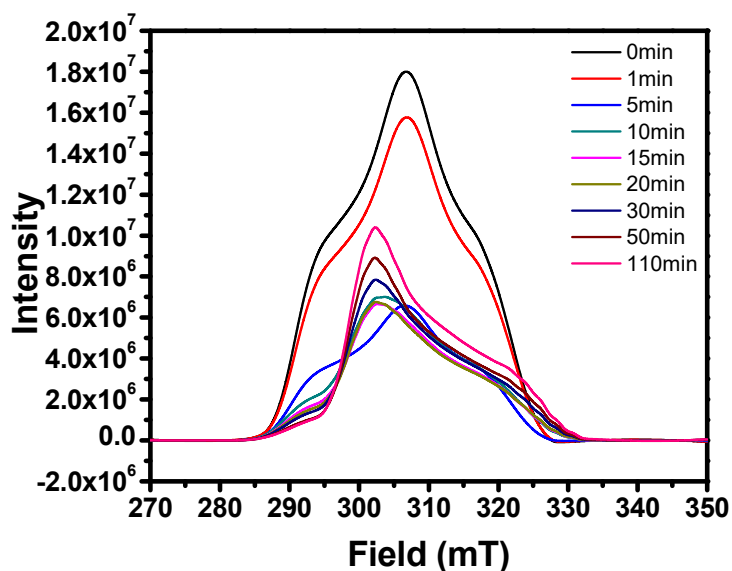

Figure S12. The integration of the EPR spectra of reaction mixture of  $1^+$  and 1 equiv. of AgOAc in MeCN at room temperature.

Table S1. Spin area based on the double integration of EPR spectra of various time points. The spin area percentages are relative to the 0 min time point.

| Time (min)             | 0   | 1    | 5    | 10   | 15   | 20   | 30   | 50   | 110  | 280   |
|------------------------|-----|------|------|------|------|------|------|------|------|-------|
| Relative spin area (%) | 100 | 87.6 | 36.9 | 38.4 | 35.4 | 34.9 | 38.7 | 41.2 | 47.4 | 44.56 |

### Control experiments with separate $Ag^+$ or $OAc^-$ sources

**Control experiment  $1^+$  +  $AgBF_4$ :** In a 20 mL vial,  $1^+$  (5.4 mg, 0.008 mmol) was dissolved in MeCN (6 mL) to which 1 equiv. of  $AgBF_4$  (1.3 mg, 0.008 mmol) was added while stirring. At each time point, 500  $\mu$ L of the solution was removed and filtered through a syringe filter to remove precipitated silver chloride into a 1 mL, 1 cm path length cuvette for UV-Vis analysis. The generation of a new band in the UV-Vis spectrum at 560nm is assigned to the acetonitrile adduct:  $^{Me}N_4Pd^{III}(neophyl)(MeCN)$ .

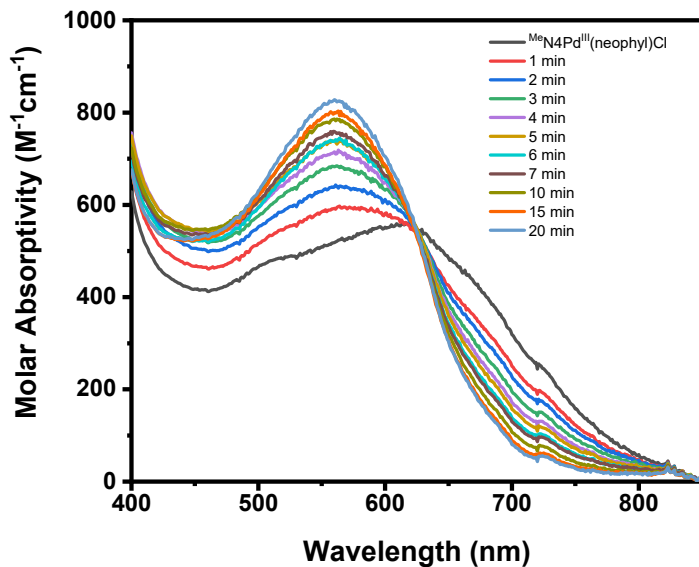

Figure S13. UV-Vis spectra of reaction mixture of  $1^+$  and 1 equiv. of  $\text{AgBF}_4$  in MeCN at room temperature at various time points. Note: the  $\text{AgCl}$  precipitate was filtered away prior to measurement.

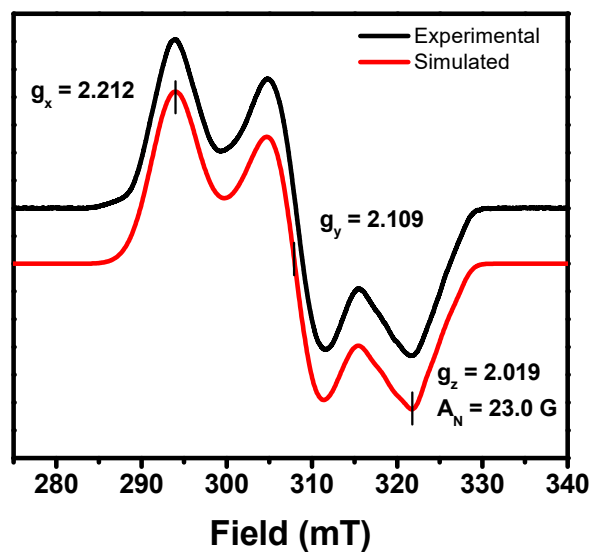

Figure S14. EPR spectrum of complex  $[1^+]\text{ClO}_4$  with 1 equiv.  $\text{AgBF}_4$  in 3:1 PrCN/MeCN.  $g_x = 2.212$ ,  $g_y = 2.109$ ,  $g_z = 2.019$  ( $A_N = 23.0$  G).



**Control experiment  $1^+ + \text{OAc}^-$ :** In a 7.0 mL vial equipped with a magnetic stir bar and a Teflon-lined cap, complex **1** (5.4 mg, 0.01 mmol) and 1 equiv. of  $\text{FcPF}_6$  (3.3 mg, 0.01 mmol) were mixed in MeCN (2 mL) and stirred for 15 min. Then, 4 equiv. of  $\text{Et}_4\text{NOAc}\cdot 4\text{H}_2\text{O}$  (10.5 mg, 0.04 mmol) was added to the reaction mixture. Then the solution was diluted 10 times and the reaction was followed by UV-Vis. Based on the absorbance of peak at 675 nm, cyclometalated product  $2^+$  was generated slowly and reached the maximum yield of 33% in 3h. Analogous reactions with up to 10 equiv. of  $\text{Et}_4\text{NOH}\cdot 4\text{H}_2\text{O}$  were also performed, but less product  $2^+$  was observed as the starting material  $1^+$  slowly decayed. Similar reactions were performed with  $\text{Bu}_4\text{NOAc}$  as acetate source.

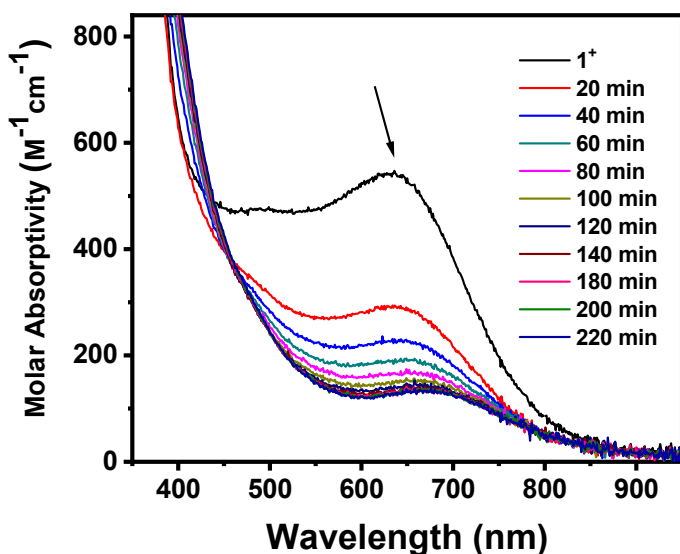

Figure S15. Formation of cyclometalated product  $2^+$  during C-H activation process of 0.5 mM  $1^+$  with 4 equiv. of  $\text{Et}_4\text{NOAc}$  in MeCN followed by UV-vis spectroscopy ( $\Delta t = 20$  min,  $t = 0$ -220 min).

Table S2. Yields and reaction time for the reaction between complex  $1^+$  and carboxylate sources under different conditions.

| Acetate source                                    | Amount of acetate | Maximum yield of $2^+$ | Reaction time at maximum yield of $2^+$ |
|---------------------------------------------------|-------------------|------------------------|-----------------------------------------|
| $\text{Et}_4\text{NOAc}\cdot 4\text{H}_2\text{O}$ | 1 equiv.          | 36%                    | 1200 min                                |
| $\text{Et}_4\text{NOAc}\cdot 4\text{H}_2\text{O}$ | 4 equiv.          | 33%                    | 220 min                                 |
| $\text{Et}_4\text{NOAc}\cdot 4\text{H}_2\text{O}$ | 10 equiv.         | < 5%                   | decay of $1^+$ in a few minutes         |
| $\text{Bu}_4\text{NOAc}$                          | 1 equiv.          | 41%                    | 1600 min                                |
| $\text{Bu}_4\text{NOAc}$                          | 2 equiv.          | 34%                    | 1100 min                                |
| $\text{Bu}_4\text{NOAc}$                          | 5 equiv.          | < 5%                   | decay of $1^+$ in a few minutes         |
| $\text{AgOPiv}$                                   | 1 equiv.          | 37%                    | 360 min                                 |

**Control experiment of reactions with a non-nucleophilic base:** In a 20 mL vial,  $1^+$  (5.5 mg, 0.008 mmol) was dissolved in MeCN (6 mL) to which either 1 equiv. or 4 equiv. of 2,6-lutidine (0.86  $\mu$ L or 3.42  $\mu$ L, 0.008 mmol or 0.031 mmol) was added while stirring, and the reaction was tracked by UV-Vis over 3 hours and up to 72 hours. In no case was formation of  $2^+$  observed. An additional control experiment was performed in which 4 equiv. of 2,6-lutidine (3.42  $\mu$ L, 0.031 mmol) was added to a solution of in situ generated **Int-A** from  $1^+$ . Coincidentally, no formation of  $2^+$  was observed.

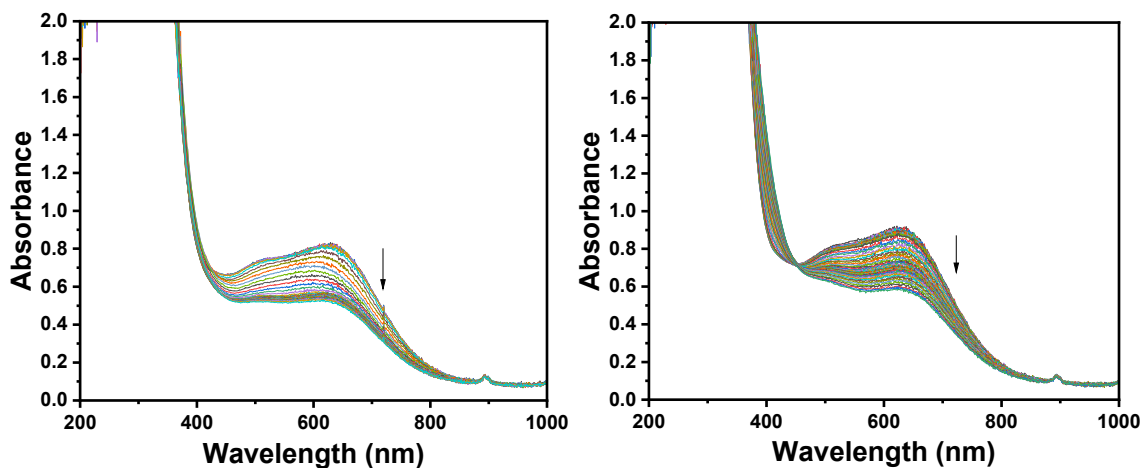

Figure S16. Addition of either 1 equiv. (left) or 4 equiv. (right) of 2,6-lutidine to  $1^+$  tracked by UV-Vis over 3 hours. No cyclometalated product was observed.

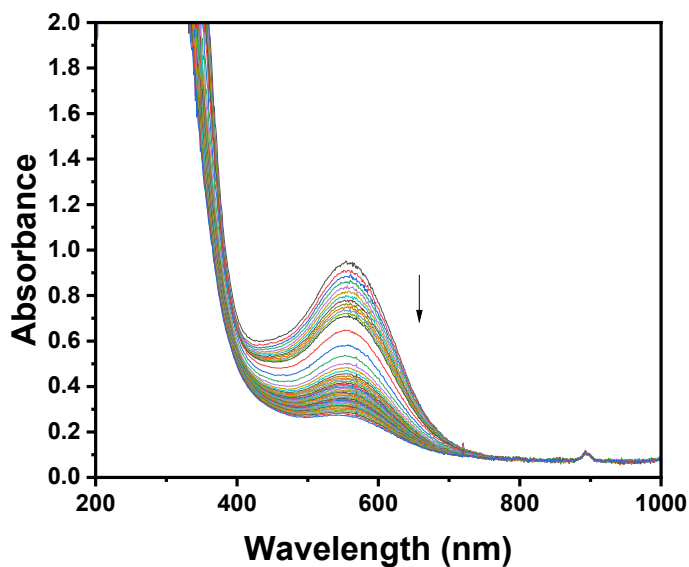

Figure S17. Addition of 4 equiv. of 2,6-lutidine to in-situ generated **Int-A** tracked by UV-Vis over 3 hours. No cyclometalated product was observed.

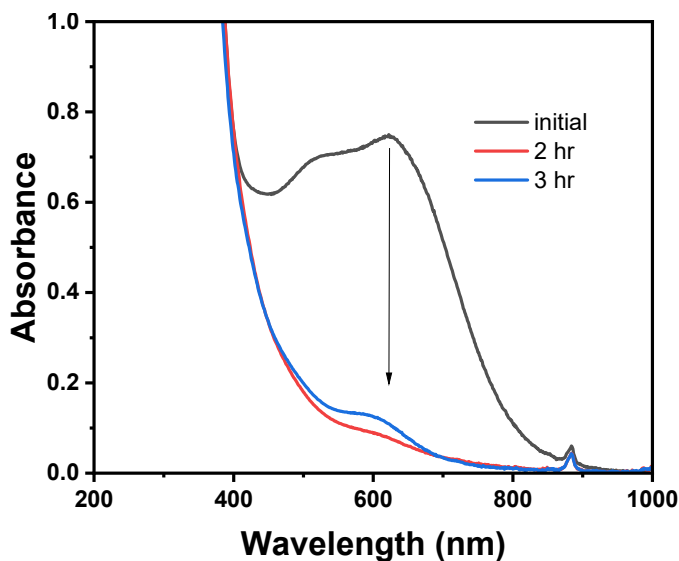

Figure S18. Reaction between  $1^+$  and 1 equiv. AgOAc in dichloromethane over 3 hours. No cyclometalated product was observed.

#### Control experiment at Pd<sup>II</sup> oxidation state

In a 7.0 mL vial equipped with a magnetic stir bar and a Teflon-lined cap, complex **1** (8.5 mg, 0.016 mmol) and 1 equiv. of AgOAc (2.61 mg, 0.016 mmol) were mixed in MeCN (3 mL). Aliquot samples were taken, filtered, and measured by UV-Vis at different time points. The same reaction was also performed in CD<sub>3</sub>CN with trimethoxybenzene as an internal standard, and the reaction progress was followed by <sup>1</sup>H NMR.

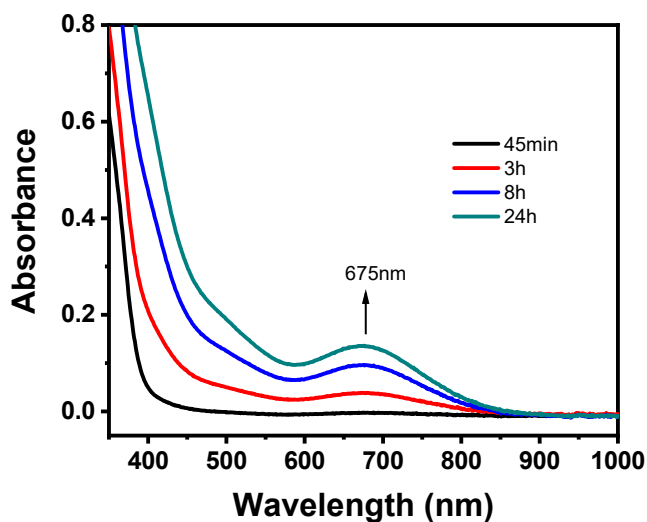

Figure S19. Formation of cyclometalated product  $2^+$  during the reaction of complex **1** with 1 equiv. of AgOAc in MeCN followed by UV-vis spectroscopy at different time points.

Table S3. Yields of the cyclometalated product **2** and **2<sup>+</sup>** and starting material **1** left in the reaction of complex **1** with 1equiv. of AgOAc.

| Time   | <b>1</b> , % | <b>2</b> , % | <b>2<sup>+</sup></b> , % |
|--------|--------------|--------------|--------------------------|
| 45 min | 40           | 56           | 3                        |
| 3 h    | 40           | 45           | 14                       |
| 8 h    | 40           | 30           | 27                       |
| 24 h   | 39           | 22           | 38                       |

**Control experiment: 1 + 2 eq AgBF<sub>4</sub>**

In a 7.0 mL vial equipped with a magnetic stir bar and a Teflon-lined cap, complex **1** (5 mg, 0.01 mmol) and 1 equiv. of AgBF<sub>4</sub> (3.6 mg, 0.02 mmol) were mixed in CD<sub>3</sub>CN (1 mL), and the starting material **1** decomposed quickly, and neither palladacycle **2** nor **2<sup>+</sup>** (based on EPR) was formed.

**Control experiment: 1 + 1 eq Et<sub>4</sub>OAc•4H<sub>2</sub>O**

In a NMR tube, complex **1** (3.9 mg, 0.007 mmol) was mixed with 1 equiv. of Et<sub>4</sub>OAc•4H<sub>2</sub>O (1.9 mg, 0.007 mmol) in CD<sub>3</sub>CN (1 mL). The reaction mixture was followed by <sup>1</sup>H NMR periodically. Based on <sup>1</sup>H NMR, palladacycle **2** was yielded quantitatively

**Control experiment: [(<sup>Me</sup>N<sub>4</sub>)Pd<sup>III</sup>(neophyl)Cl]<sup>+</sup> (1<sup>+</sup>) + 2eq AgOAc**

In order to investigate the possible involvement of Pd<sup>IV</sup> intermediate formation due to Ag<sup>+</sup> sources, in situ formed **1<sup>+</sup>** was reacted with 2 equiv. of AgOAc. Complex **1** (2.3 mg, 0.004 mmol) was first reacted with 1 equiv. of FcPF<sub>6</sub> (1.4 mg, 0.004 mmol) in CD<sub>3</sub>CN (1 mL) for 15 min to yield dark purplish Pd<sup>III</sup> species **1<sup>+</sup>**. Then to this solution, 2 equiv. of AgOAc (1.4 mg, 0.008 mmol) was added, and the dark purplish solution first turned green (corresponding to **2<sup>+</sup>**) and then turned yellowish in about 30 min. Based on the chemical shift of the product, either [<sup>Me</sup>N<sub>4</sub>H]<sup>+</sup> or the [<sup>Me</sup>N<sub>4</sub>Ag]<sup>+</sup> species (based on both <sup>1</sup>H NMR and ESI-MS of the reaction mixture) and t-Butylbenzene were formed. No **2<sup>2+</sup>** was observed.

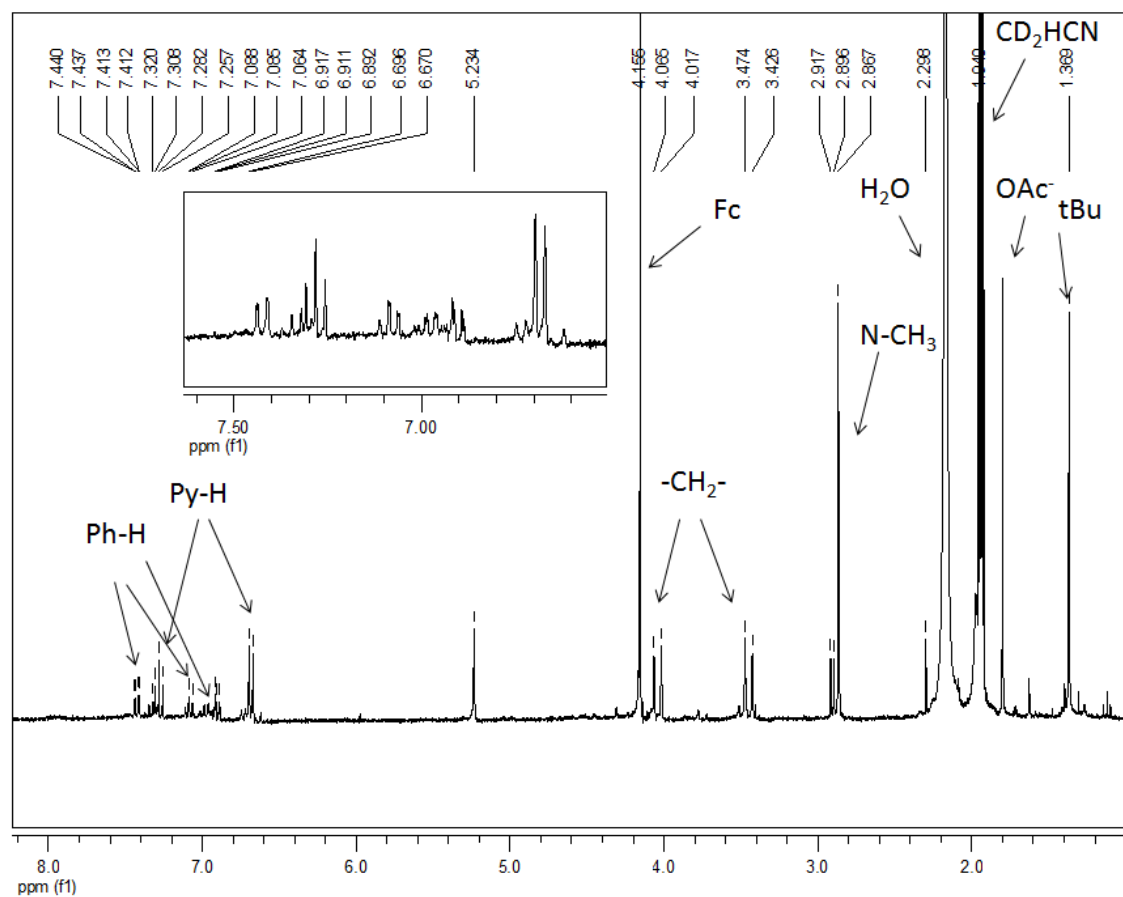

Figure S20.  $^1\text{H}$  NMR spectrum of reaction mixture of in situ formed  $\mathbf{1}^+$  with 2 equiv. of AgOAc in  $\text{CD}_3\text{CN}$  after 30 min.

### KIE studies by ESI-MS Spectroscopy

The ESI-MS experiments were performed using a Bruker Maxis Q-TOF mass spectrometer with an electrospray ionization source. A 1:1 ratio of complex  $\mathbf{1}$  (2.2 mg, 0.004 mmol) and complex  $\mathbf{1-d}_5$  were mixed with  $\text{FcPF}_6$  (2.8 mg, 0.008 mmol) in MeCN (1 mL) for 15 min, and this solution was measured by ESI-MS to confirm a 1:1 ratio of  $\mathbf{1}^+$  and  $\mathbf{1}^+d_5$ . Then AgOAc (1.6 mg, 0.009 mmol) was added to the reaction mixture. At 5 min, 15 min, 30 min and 50 min,  $\sim 1$   $\mu\text{L}$  aliquots were taken by pipet, diluted, and measured by ESI-MS immediately to monitor the progress of the reaction. The ESI-MS spectra show the existence of the following cationic intermediates during the reaction:  $\mathbf{1}^+$  ( $m/z$  542.1, calcd. 542.1),  $\mathbf{1}^+d_5$  ( $m/z$  547.2, calcd. 547.2),  $\mathbf{2}^+$  ( $m/z$  506.2, calcd. 506.2) and  $\mathbf{2}^+d_4$  ( $m/z$  510.2, calcd. 510.2). Note: the peaks at 548.2 and 511.2 corresponding to  $\mathbf{1}^+d_6$  and  $\mathbf{2}^+d_5$ , the extra deuterium was on the methyl group or methylene group carried along from the neophyl chloride- $d_5$  starting material.

Over the monitored time course of the reaction, the ESI-MS peak intensity ratio of the cyclometalated products  $\mathbf{2}^+:\mathbf{2}^+d_4$  remained constant at  $\sim 1.3$  (Figure S17). In addition, the

consumption of the starting material correlated well with the formation of cyclometalated product, as the ESI-MS peak intensity ratio of the starting material  $1^{+}-d_5 : 1^{+}$  was also  $\sim 1.3$ . Overall, a small kinetic isotopic effect ( $KIE = k_H/k_D = 1.28 \pm 0.05$ ) was measured for the C-H activation step.

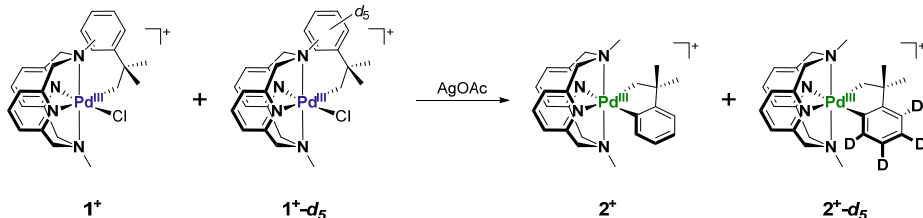

| Time    | $2^{+}$ | $2^{+}-d_4$ | $1^{+}$ | $1^{+}-d_5$ | $2^{+} / 2^{+}-d_4$ | $1^{+}-d_5 / 1^{+}$ |
|---------|---------|-------------|---------|-------------|---------------------|---------------------|
| 1 min   | 0       | 0           | 0.943   | 1           | Not detected        | 1.06                |
| 5 min   | 0.625   | 0.512       | 0.879   | 1           | 1.21                | 1.13                |
| 10 min  | 1       | 0.742       | 0.247   | 0.3         | 1.34                | 1.21                |
| 20 min  | 1       | 0.782       | 0.107   | 0.143       | 1.28                | 1.34                |
| 30 min  | 1       | 0.788       | 0.026   | 0.038       | 1.27                | 1.44                |
| 50 min  | 1       | 0.774       | 0.011   | 0.014       | 1.29                | 1.28                |
| Average |         |             |         |             | <b>1.28±0.05</b>    | <b>1.28±0.11</b>    |

$$KIE = k_H/k_D = 1.28 \pm 0.05$$

Figure S21. Kinetic isotope data for the conversion from  $1$  to  $1^{+}$  and  $1-d_5$  to  $1^{+}-d_4$  in the presence of AgOAc. Ratios at each time point determined by ESI-MS.

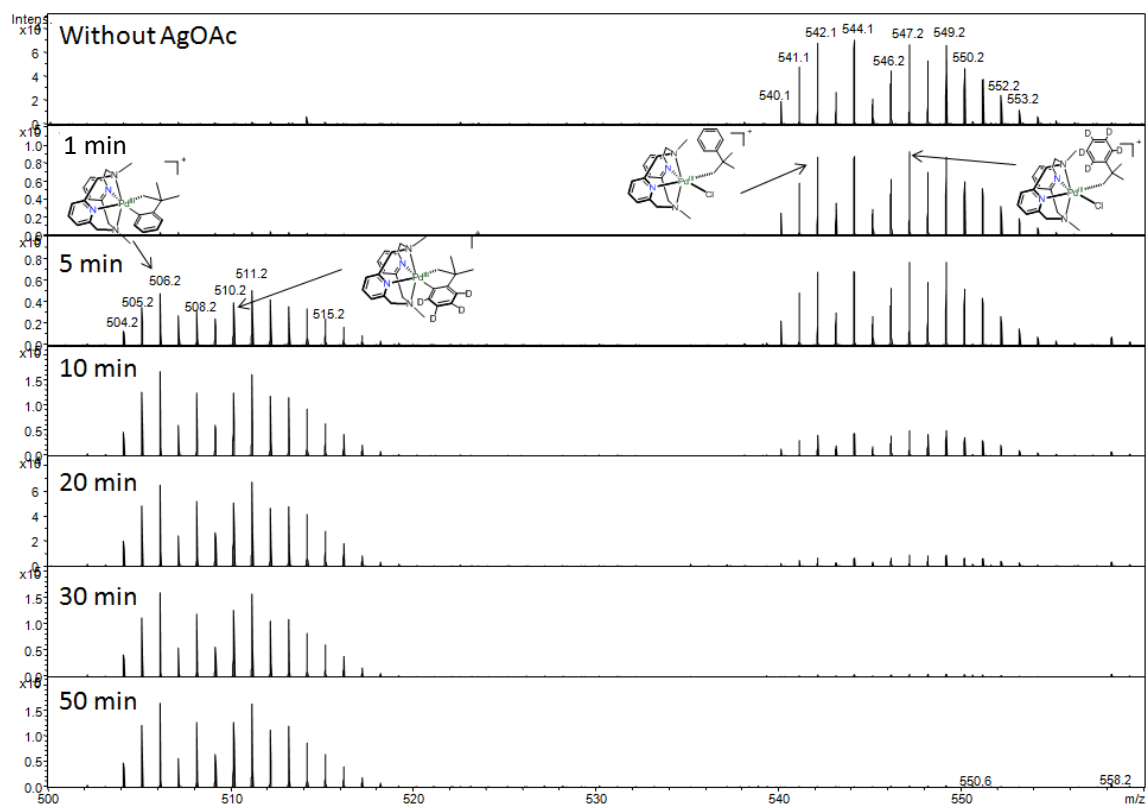

Figure S22. ESI-MS spectra for ~1:1 ratio of complex  $1^+$  and  $1^+ - d_5$  with AgOAc in MeCN at different time points.

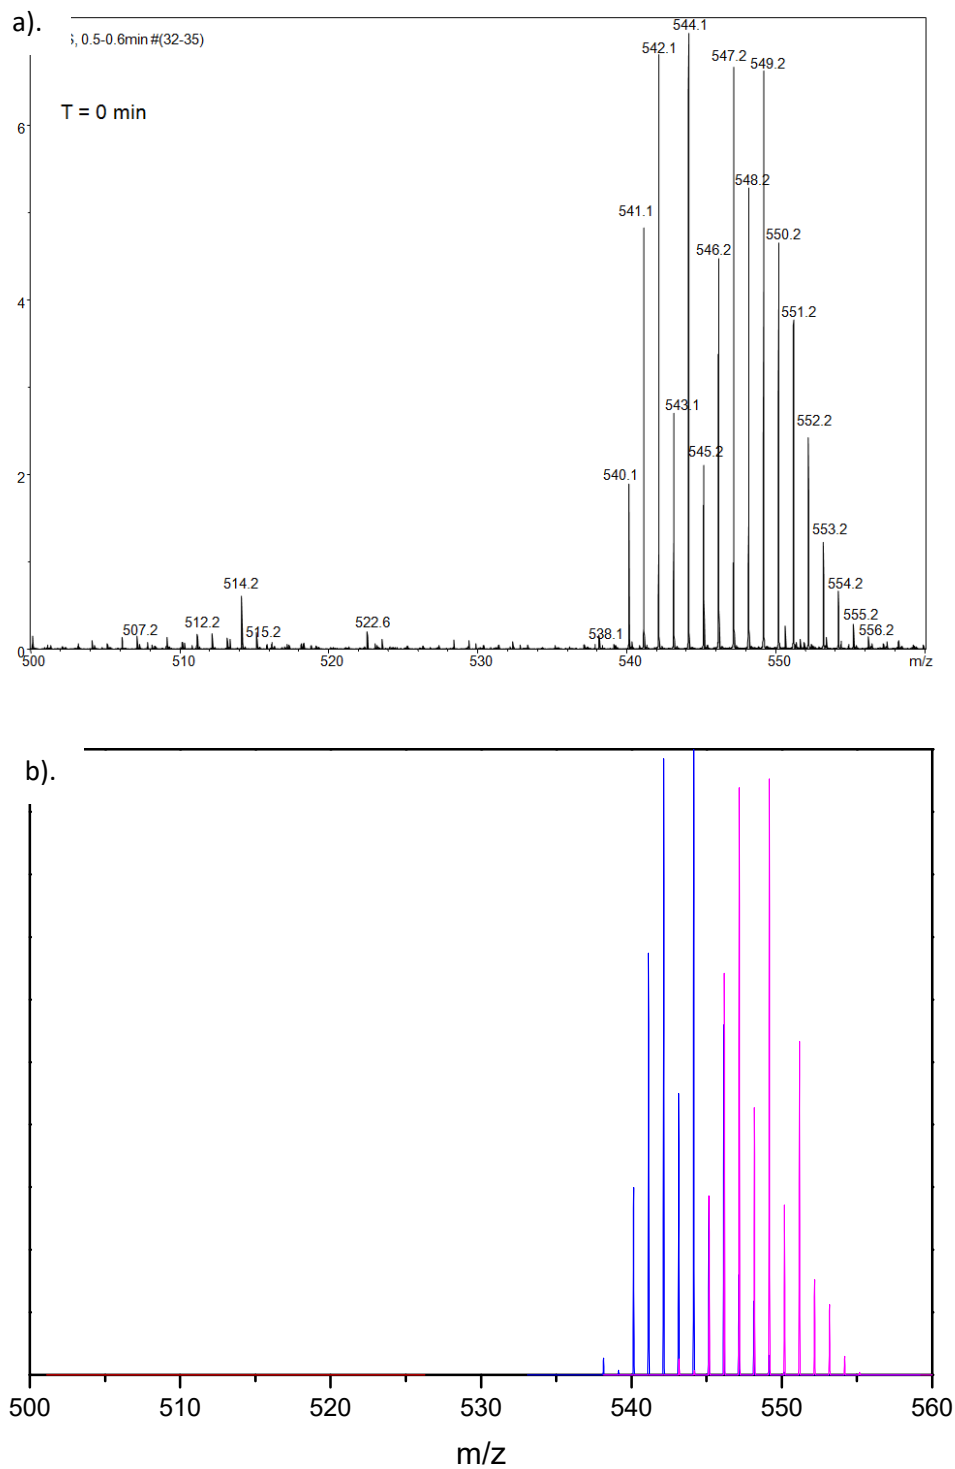

Figure S23. a). ESI-MS spectrum at the 0 min time point (before addition of AgOAc); b) Simulation of the isotopic pattern using a ~1:1 ratio of  $1^+$  and  $1^+-d_5$ . Note: The variation of isotopic pattern of  $1^+-d_5$  is likely due to the incorporation of deuterium on the methylene group and methyl group of neophyl ligand.



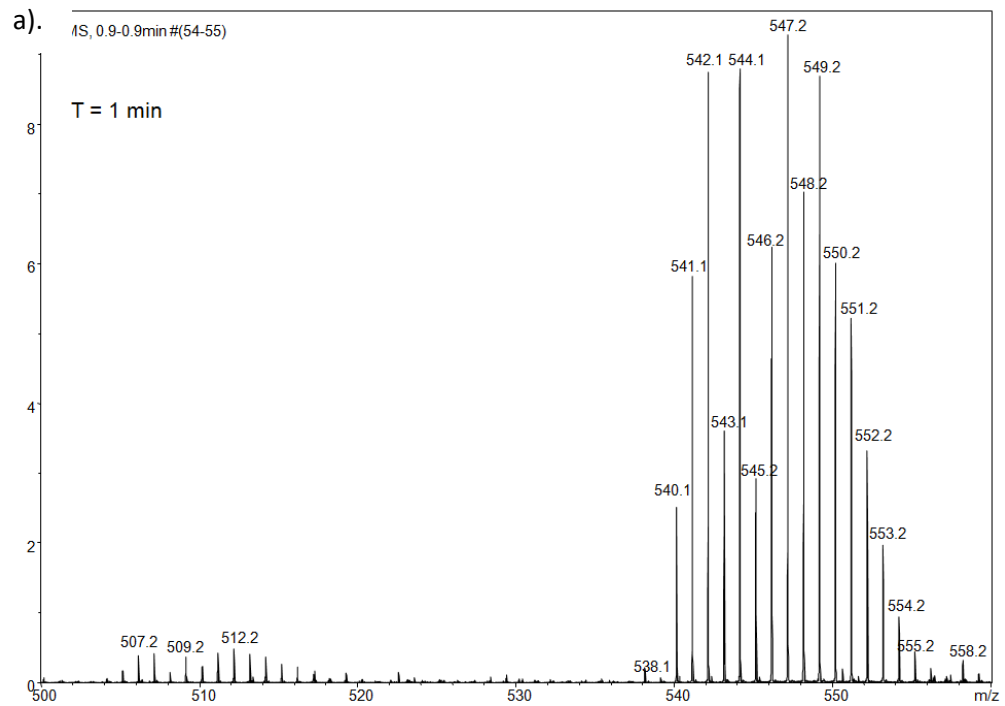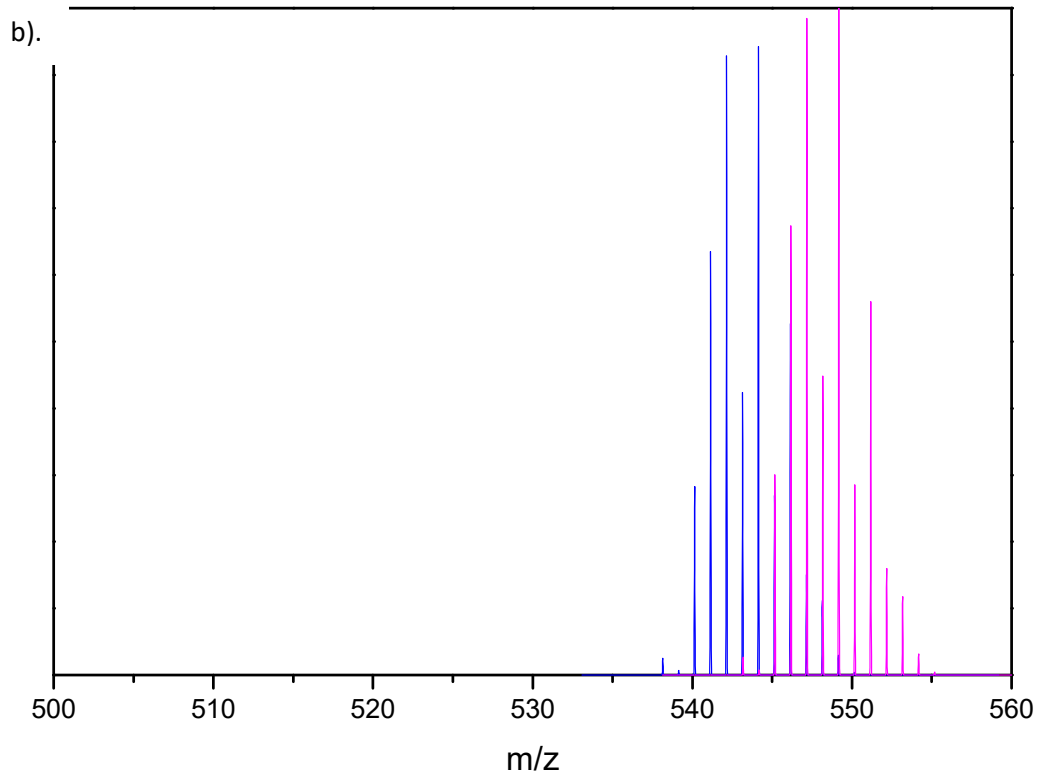

Figure S24. a). ESI-MS spectrum at the 1 min time point; b) Simulation of the isotopic pattern using a ~1:1 ratio of  $\mathbf{1}^+$  and  $\mathbf{1}^+-d_5$ .

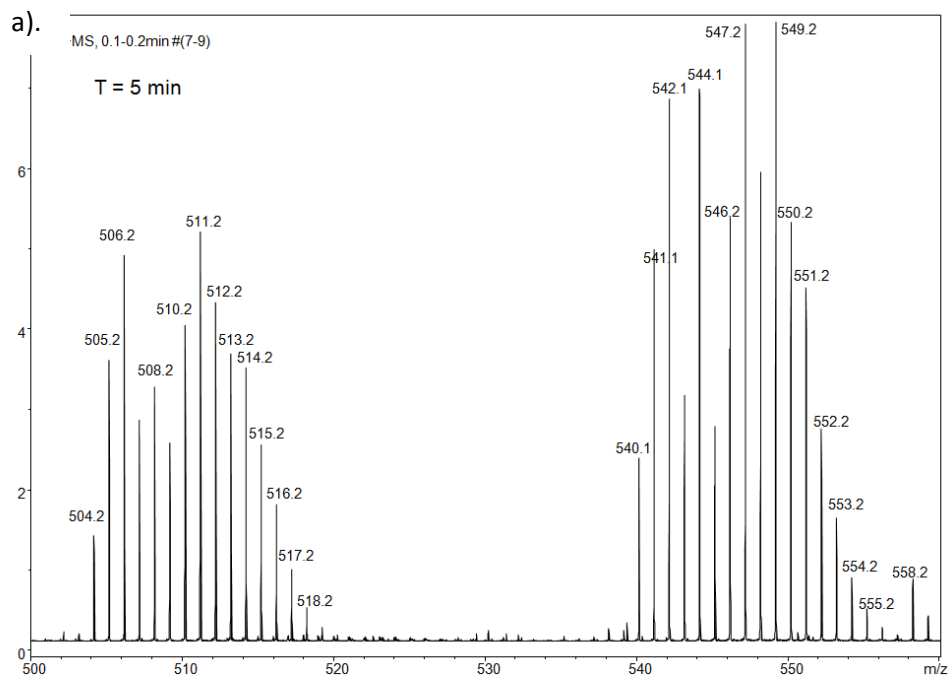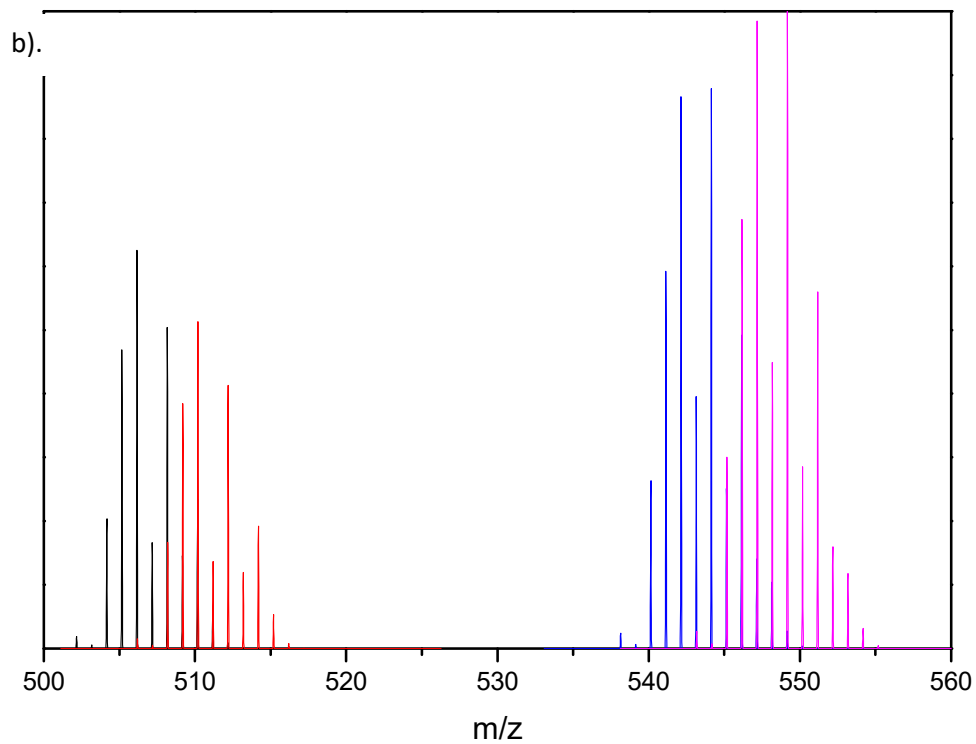

Figure S25. a). ESI-MS spectrum at the 5 min time point; b) Simulation of the isotopic pattern using a 0.6249:0.5123:0.8789:1 ratio of  $2^+ : 2^+-d_4 : 1^+ : 1^+-d_5$ .

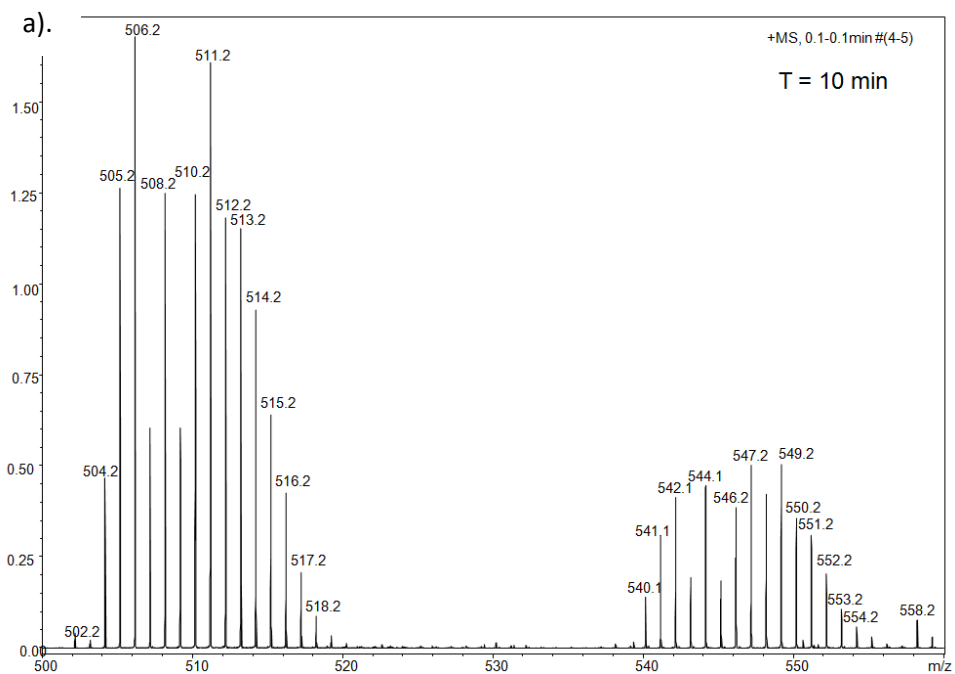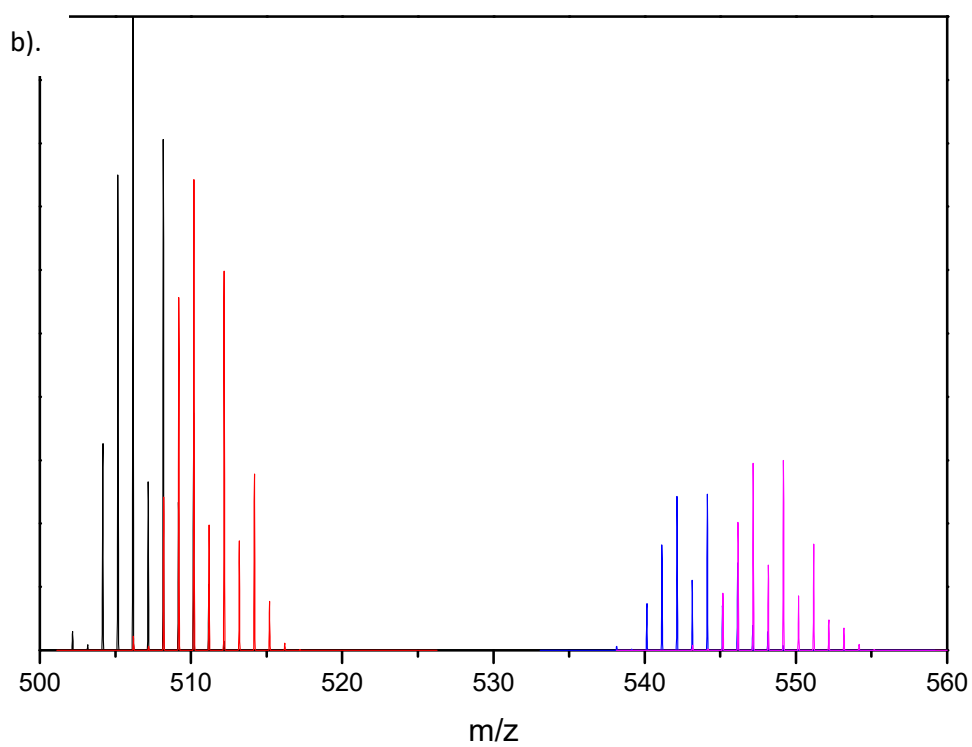

Figure S26. a). ESI-MS spectrum at the 10 min time point; b) Simulation of the isotopic pattern using a 1:0.7422:0.2465:0.2997 ratio of  $2^+$  :  $2^+ - d_4$  :  $1^+$  :  $1^+ - d_5$ .

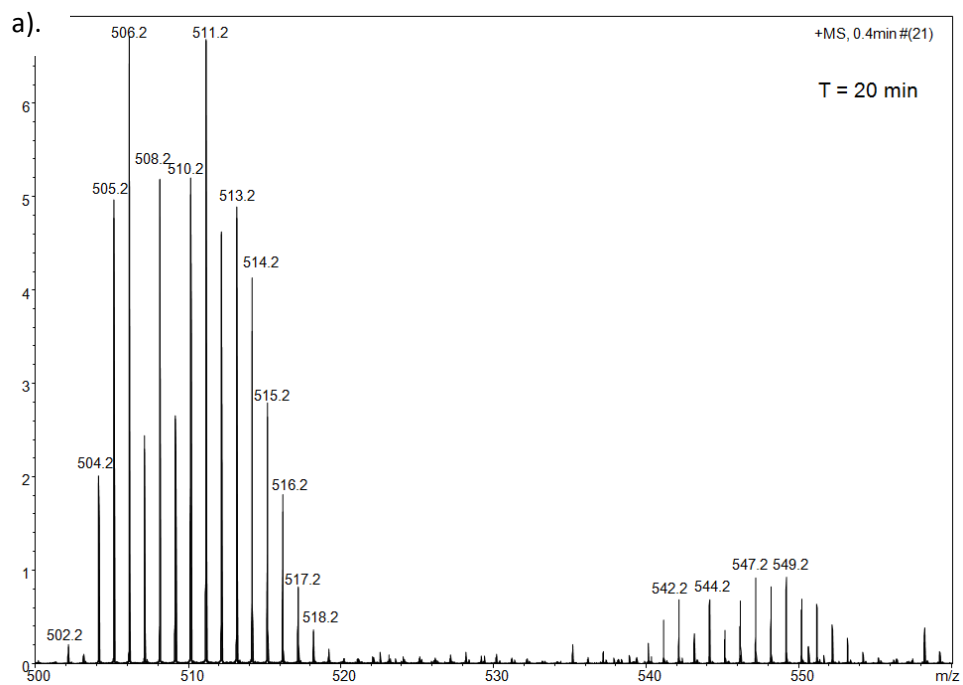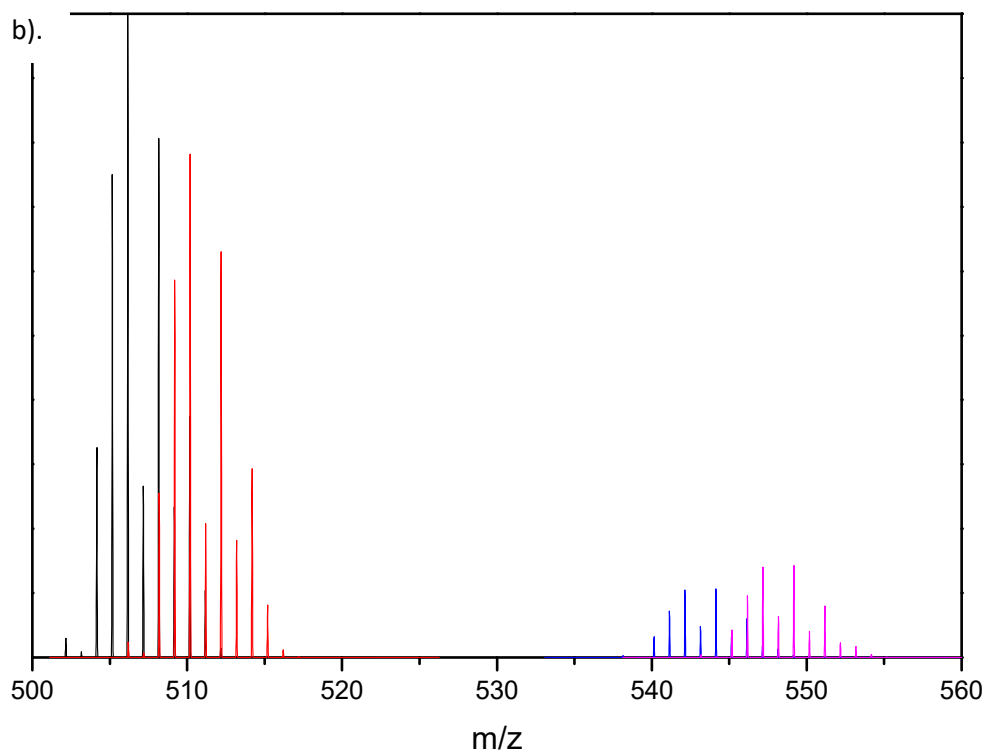

Figure S27 a). ESI-MS spectrum at the 20 min time point; b) Simulation of the isotopic pattern using a 1:0.7817:0.1065:0.1426 ratio of  $2^+$  :  $2^+-d_4$  :  $1^+$  :  $1^+-d_5$ .

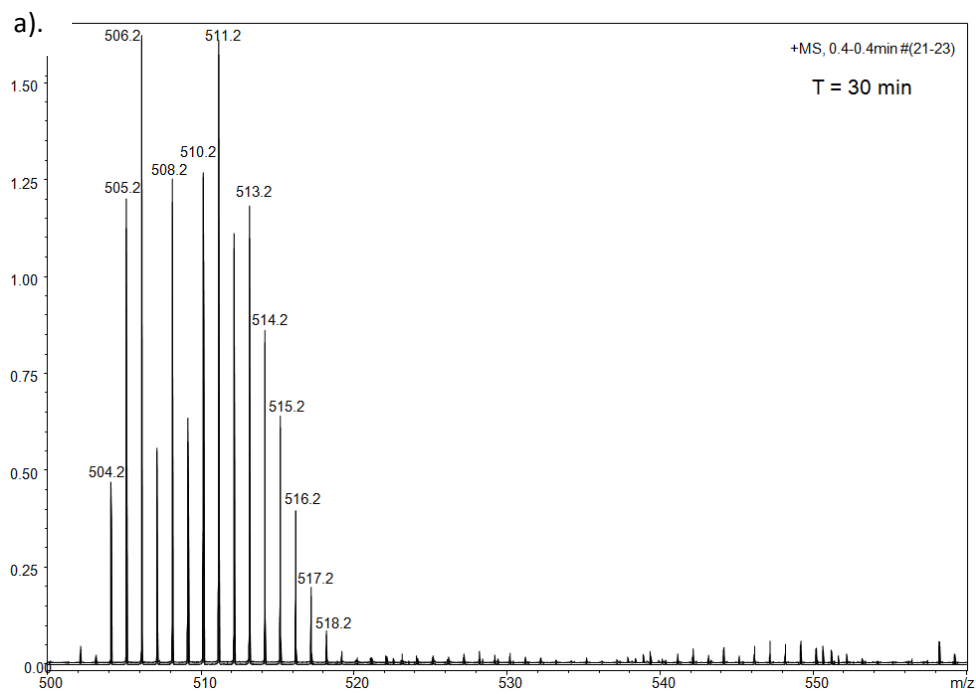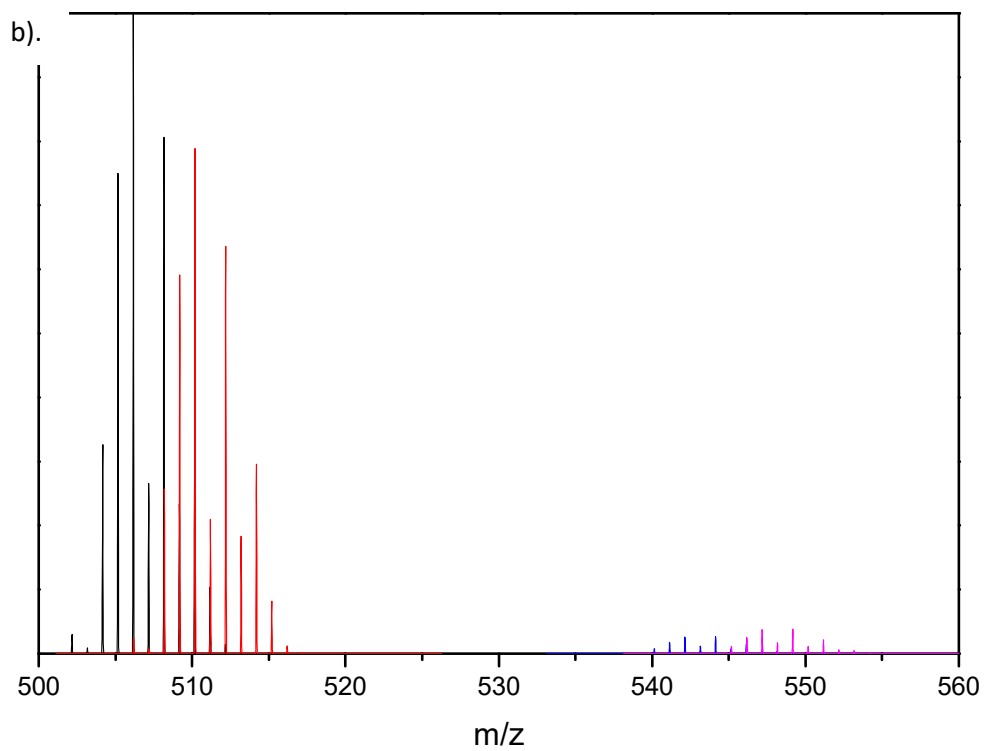

Figure S28. a). ESI-MS spectrum at the 30 min time point; b) Simulation of the isotopic pattern using a 1:0.7884:0.0263:0.0378 ratio of  $2^+ : 2^+-d_4 : 1^+ : 1^+-d_5$ .

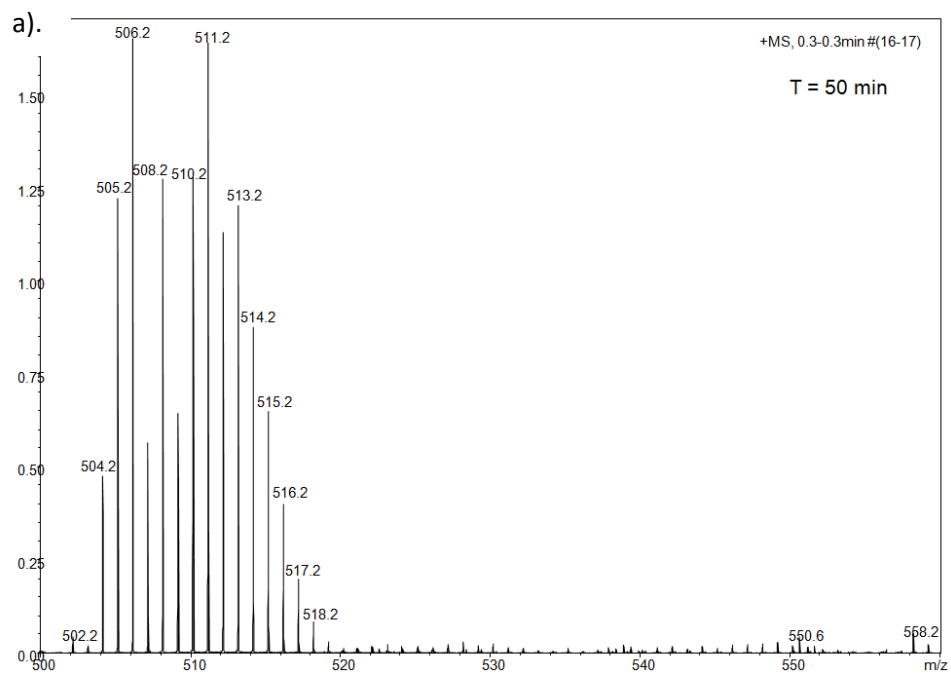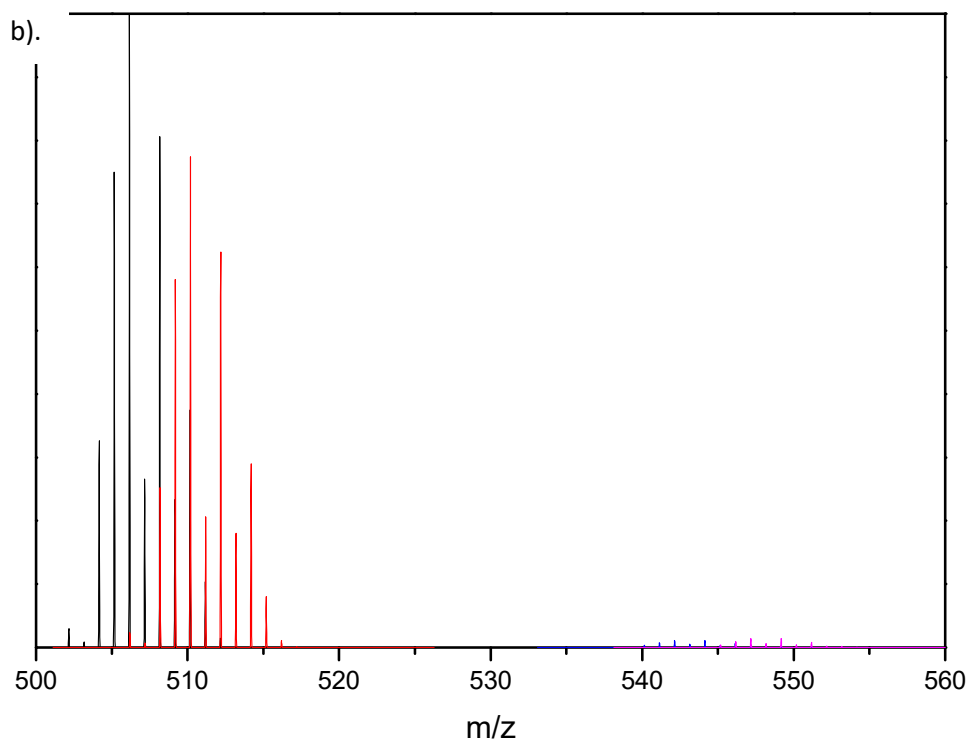

Figure S29. a). ESI-MS spectrum at the 50 min time point; b) Simulation of the isotopic pattern using a 1:0.7742:0.0111:0.0143 ratio of  $2^+$  :  $2^+-d_4$  :  $1^+$  :  $1^+-d_5$ .

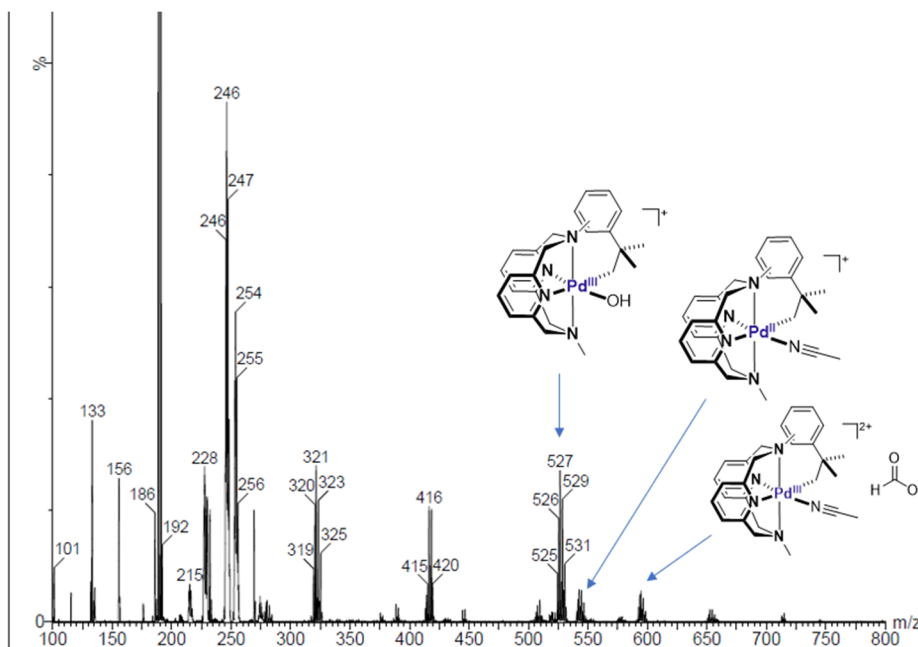

Figure S30. ESI-MS data for the reaction between **1**<sup>+</sup> and 1 equiv. of AgBF<sub>4</sub> after 20 minutes in acetonitrile showing formation of acetonitrile adduct. The formate and hydroxide ions are present adventitiously in the ESI-MS instrument.

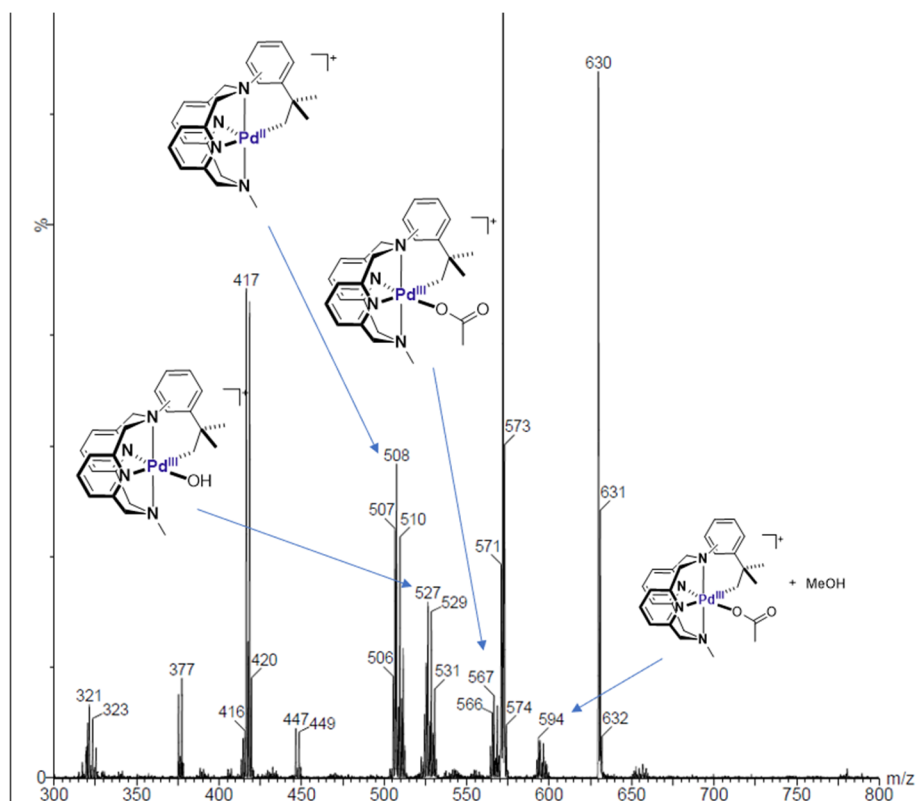

Figure S31. ESI-MS data for the reaction between in-situ generated **Int-A** and 1 equiv. of nBu<sub>4</sub>OAc after 1 minute. The hydroxide ion and methanol are present adventitiously in the ESI-MS instrument.

#### IV. CV, UV-Vis, and EPR spectra

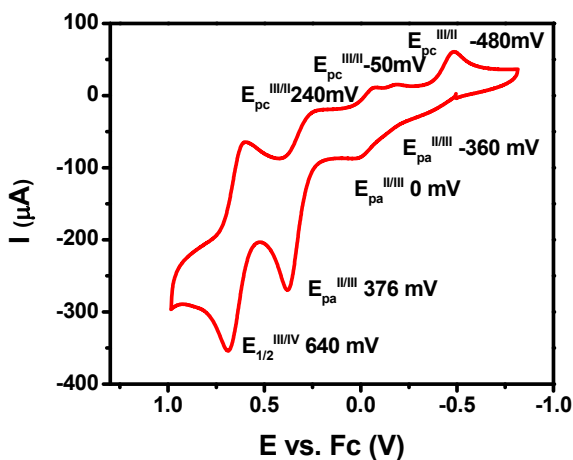

Figure S32. Cyclic voltammogram of complex **1** in 0.1 M Bu<sub>4</sub>NClO<sub>4</sub>/MeCN. Conditions: GCE, 100 mV/s. Note: Several anodic and cathodic waves corresponding to Pd<sup>II/III</sup> transitions are due to the oxidation and reduction of different conformers of the ligand in solution.

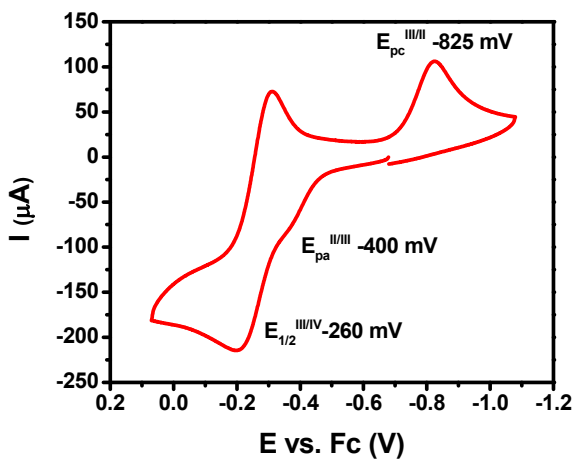

Figure S33. Cyclic voltammogram of complex **2** in 0.1 M Bu<sub>4</sub>NClO<sub>4</sub>/MeCN. Conditions: GCE, 100 mV/s.



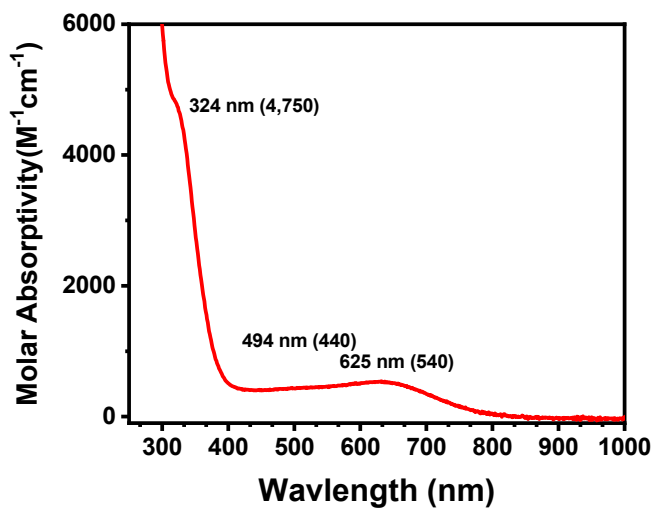

Figure S34. UV-vis spectrum of complex  $[1^+]ClO_4$  in MeCN

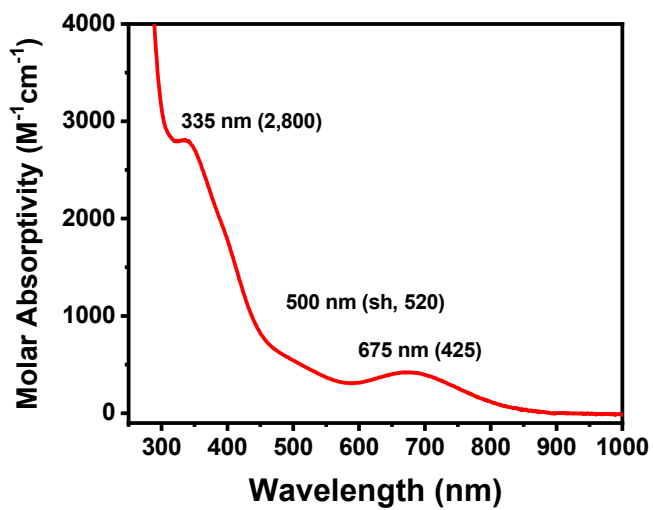

Figure S35. UV-vis spectrum of  $[2^+]ClO_4$  in MeCN

## EPR spectra

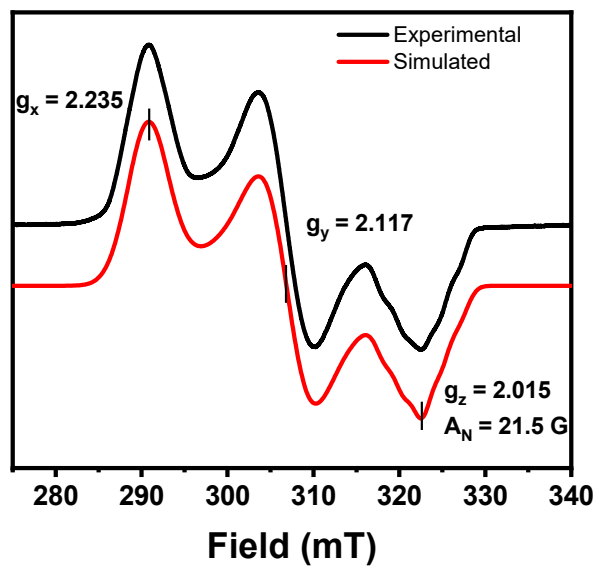

Figure S36. EPR spectrum of complex  $[1^+]\text{ClO}_4$  in 3:1 PrCN/MeCN.  $g_x = 2.235$ ,  $g_y = 2.117$ ,  $g_z = 2.015$  ( $A_N = 21.5$  G).

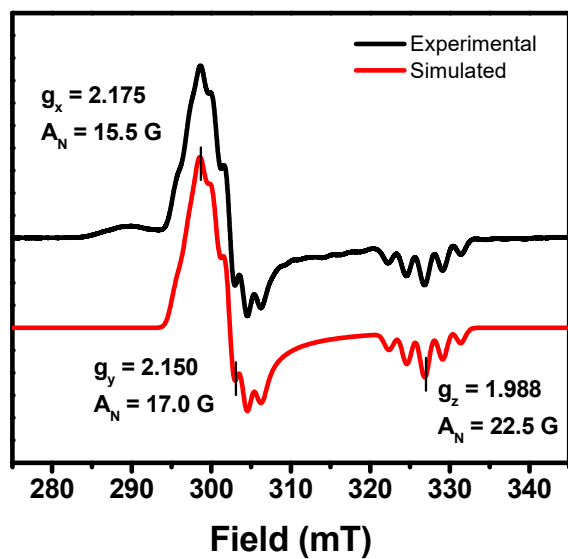

Figure S37. EPR spectrum of complex  $[2^+]\text{ClO}_4$  in 3:1 PrCN/MeCN.  $g_x = 2.175$  ( $A_N = 15.5$  G),  $g_y = 2.150$  ( $A_N = 17.0$  G),  $g_z = 1.988$  ( $A_N = 22.5$  G).

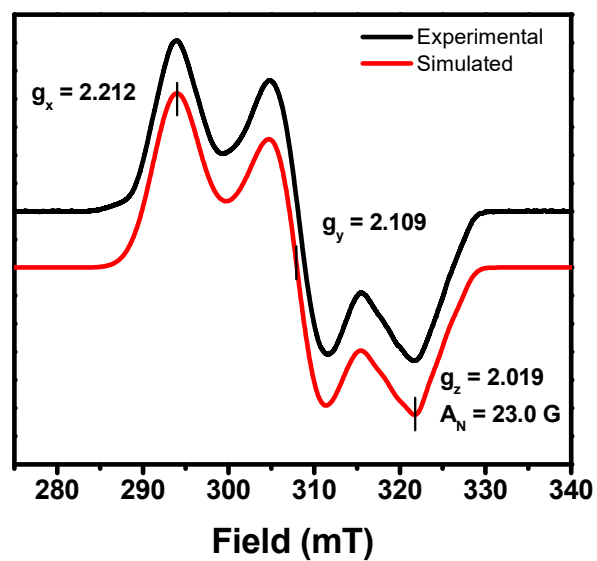

Figure S38. EPR spectrum of complex **Int-A** in 3:1 PrCN/MeCN.  $g_x = 2.212$ ,  $g_y = 2.109$ ,  $g_z = 2.019$  ( $A_N = 23.0$  G).

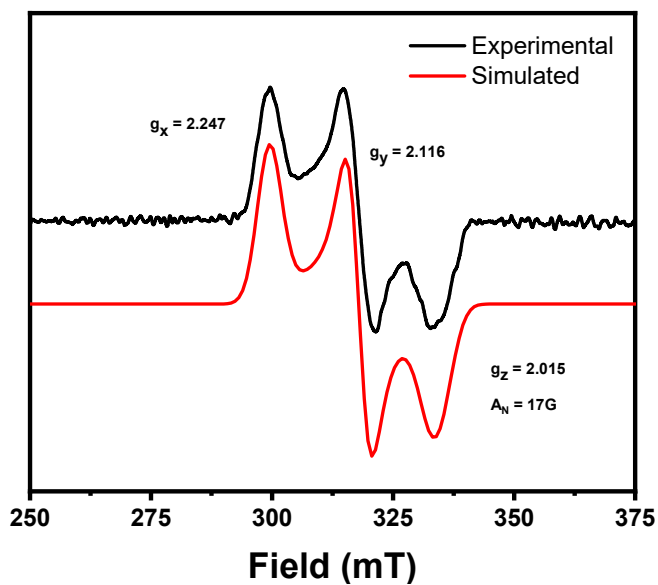

Figure S39. EPR spectrum of complex **Int-B** in 3:1 PrCN/MeCN.

## V. Aerobic oxidation of complexes 1 and 2

In a UV-Vis cuvette equipped with a septum, complex **1** (2.0 mg, 0.004 mmol) was dissolved in O<sub>2</sub> saturated 5% H<sub>2</sub>O/MeCN (2 mL) to make 1.84 mM solution. A peak at 675 nm corresponding to **2**<sup>+</sup> grew slowly and reached its maximum point (0.532) in about 30 hours, and decayed slowly. Based on the extinction coefficient of **2**<sup>+</sup> (425 M<sup>-1</sup>\*cm<sup>-1</sup>), the yield is calculated as 68 %. The identity of **2**<sup>+</sup> was also confirmed by EPR and ESI-MS spectroscopy. The O<sub>2</sub> saturated solution was prepared by bubbling O<sub>2</sub> gas through the H<sub>2</sub>O/MeCN solution for 10 minutes. Note: Addition of H<sub>2</sub>O is to promote the formation of Pd<sup>III</sup> species.

7

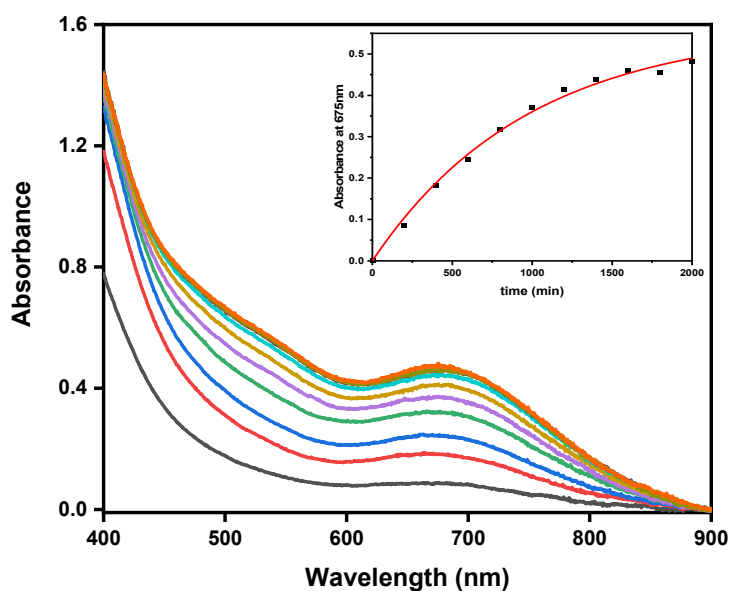

Figure S40. Formation of **2**<sup>+</sup> during aerobic oxidation of complex **1** (1.84 mM) in O<sub>2</sub> saturated 5% H<sub>2</sub>O/MeCN followed by UV-vis spectroscopy ( $\Delta t = 200$  min,  $t_{\max} = 2000$  min). Inset: plot of the concentration of **2**<sup>+</sup> monitored at 675 nm and first-order fitting (red line,  $k = 0.00103$  min<sup>-1</sup>,  $R^2 = 0.995$ ).

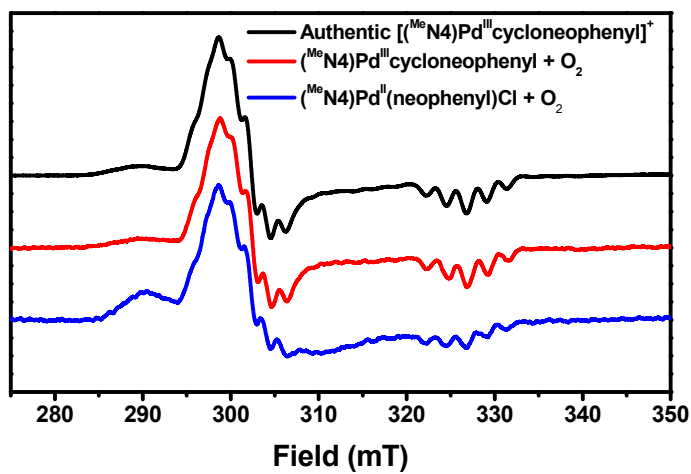

Figure S41. EPR spectrum of ( $2^+$ ) in 3:1 PrCN/MeCN.  $g_x = 2.175$  ( $A_N = 15.5$  G),  $g_y = 2.150$  ( $A_N = 17.0$  G),  $g_z = 1.988$  ( $A_N = 22.5$  G). Black: authentic [ $2^+$ ] $ClO_4$ . Red: reaction mixture of complex **2** with  $O_2$  in Blue: Reaction mixture of **1** with  $O_2$ .

## VI. ORTEP and space-filling models of [1], [1<sup>+</sup>], [2], [2<sup>+</sup>] and [2<sup>2+</sup>]

Table S4. ORTEP diagrams and space filling models for [1], [1<sup>+</sup>], [2], [2<sup>+</sup>] and [2<sup>2+</sup>]

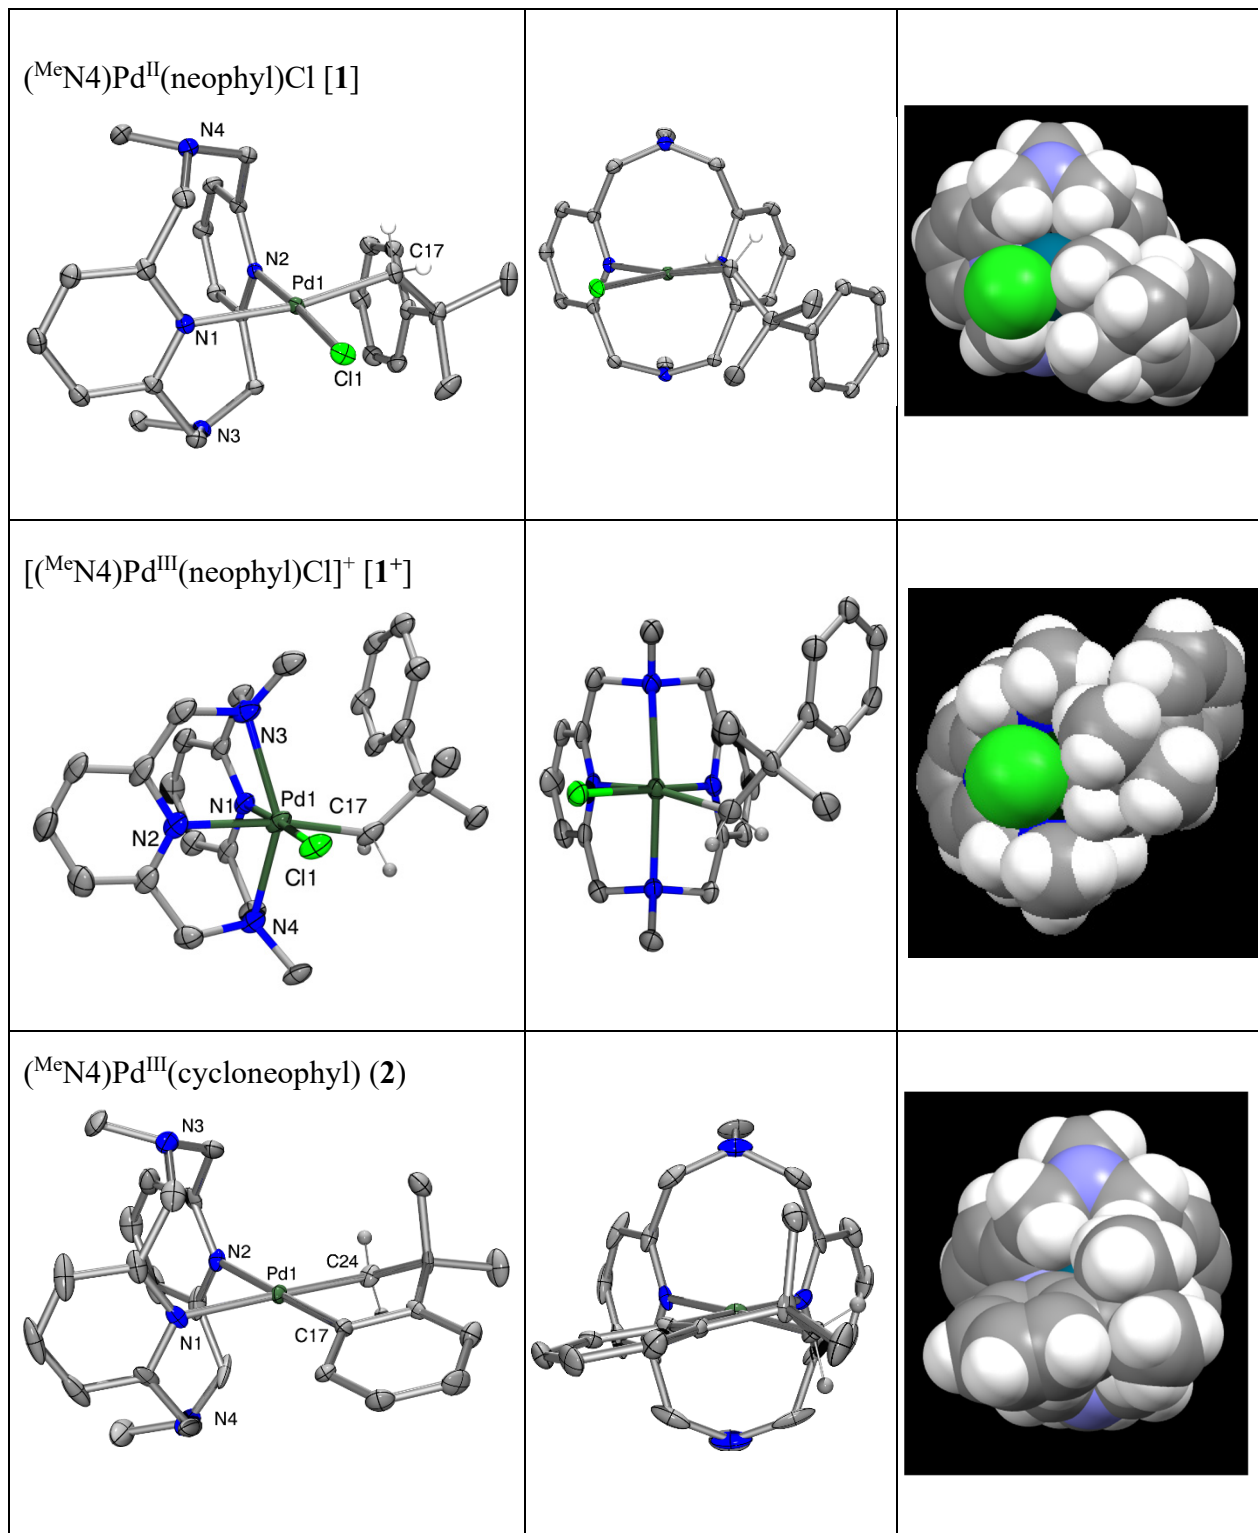

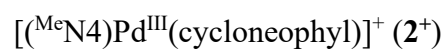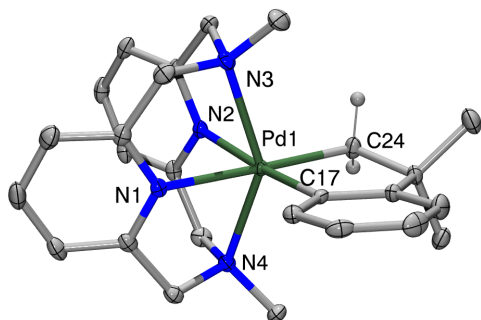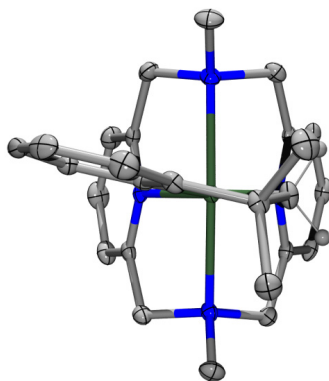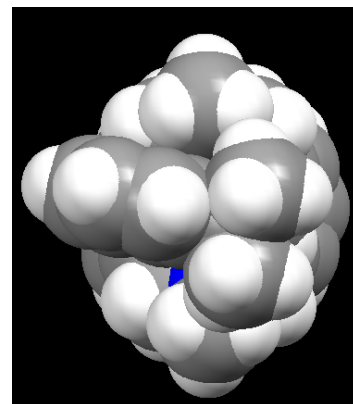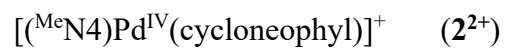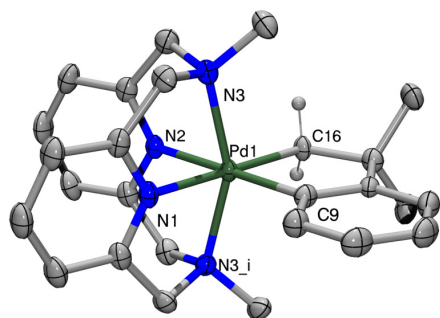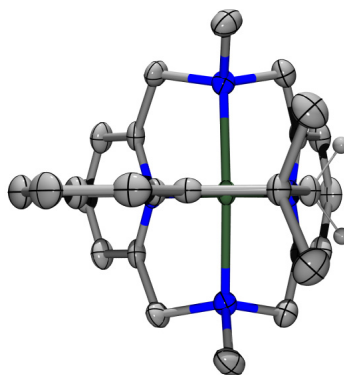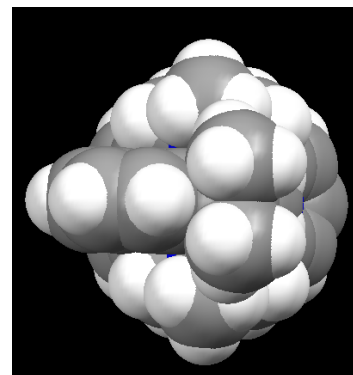

## VII. X-ray crystallographic data of **1**, **2**, **[2<sup>+</sup>]**PF<sub>6</sub>, and **[2<sup>2+</sup>]**(ClO<sub>4</sub>)<sub>2</sub>

*General information:* Crystals of x-ray diffraction quality were obtained by slow ether vapor diffusion or layering into the corresponding acetonitrile solution of **1**, **2**, **3**, **4**. Suitable crystals of appropriate dimensions were mounted on Mitgen loops in random orientations. Preliminary examination and data collection were performed using a Bruker Kappa Apex-II Charge Coupled Device (CCD) Detector system single crystal X-Ray diffractometer equipped with an Oxford Cryostream LT device. Data were collected using graphite monochromated Mo K $\alpha$  radiation ( $\lambda = 0.71073 \text{ \AA}$ ) from a fine focus sealed tube X-Ray source. Preliminary unit cell constants were determined with a set of 36 narrow frame scans. Typical data sets consist of a combination of  $\omega$  and  $\phi$  scan frames with typical scan width of  $0.5^\circ$  and counting time of 15-30 seconds/frame at a crystal to detector distance of  $\sim 4.0 \text{ cm}$ . The collected frames were integrated using an orientation matrix determined from the narrow frame scans. Apex II and SAINT software packages (*Bruker Analytical X-Ray, Madison, WI, 2008*) were used for data collection and data integration. Analysis of the integrated data did not show any decay. Final cell constants were determined by global refinement of reflections from the complete data set. Data were corrected for systematic errors using SADABS (*Bruker Analytical X-Ray, Madison, WI, 2008*) based on the Laue symmetry using equivalent reflections.

Structure solutions and refinement were carried out using the SHELXTL- PLUS software package. The structures were refined with full matrix least-squares refinement by minimizing  $\sum w(F_o^2 - F_c^2)^2$ . All non-hydrogen atoms were refined anisotropically to convergence. Typically, H atoms are added at the calculated positions in the final refinement cycles.

Acknowledgement: Funding from the National Science Foundation (MRI, CHE-0420497) for the purchase of the Apex II diffractometer is acknowledged.

### X-ray structure determinations of **[1]**, **[1<sup>+</sup>]**, **[2]**, **[2<sup>+</sup>]**, and **[2<sup>2+</sup>]**

Table S5. Crystal data and structure refinement for **1**.

|                     |                                                     |
|---------------------|-----------------------------------------------------|
| Identification code | MeN4PdNeophylCl                                     |
| Empirical formula   | C <sub>26</sub> H <sub>33</sub> ClN <sub>4</sub> Pd |
| Formula weight      | 543.41                                              |
| Temperature/K       | 100.0                                               |
| Crystal system      | monoclinic                                          |
| Space group         | P2 <sub>1</sub> /c                                  |
| a/ $\text{\AA}$     | 8.7777(2)                                           |



|                                                |                                                                  |
|------------------------------------------------|------------------------------------------------------------------|
| b/Å                                            | 30.6361(6)                                                       |
| c/Å                                            | 9.7205(2)                                                        |
| $\alpha/^\circ$                                | 90                                                               |
| $\beta/^\circ$                                 | 113.69                                                           |
| $\gamma/^\circ$                                | 90                                                               |
| Volume/Å <sup>3</sup>                          | 2393.64(9)                                                       |
| Z                                              | 4                                                                |
| $\rho_{\text{calc}}/\text{cm}^3$               | 1.508                                                            |
| $\mu/\text{mm}^{-1}$                           | 0.908                                                            |
| F(000)                                         | 1120.0                                                           |
| Crystal size/mm <sup>3</sup>                   | 0.225 × 0.124 × 0.088                                            |
| Radiation                                      | MoK $\alpha$ ( $\lambda = 0.71073$ )                             |
| 2 $\Theta$ range for data collection/ $^\circ$ | 4.766 to 56.59                                                   |
| Index ranges                                   | -11 ≤ h ≤ 11, -40 ≤ k ≤ 40, -12 ≤ l ≤ 12                         |
| Reflections collected                          | 81975                                                            |
| Independent reflections                        | 5949 [ $R_{\text{int}} = 0.0249$ , $R_{\text{sigma}} = 0.0103$ ] |
| Data/restraints/parameters                     | 5949/0/293                                                       |
| Goodness-of-fit on F <sup>2</sup>              | 1.100                                                            |
| Final R indexes [ $I \geq 2\sigma(I)$ ]        | $R_1 = 0.0178$ , $wR_2 = 0.0431$                                 |
| Final R indexes [all data]                     | $R_1 = 0.0185$ , $wR_2 = 0.0435$                                 |
| Largest diff. peak/hole / e Å <sup>-3</sup>    | 0.39/-0.50                                                       |

Table S6. Fractional Atomic Coordinates ( $\times 10^4$ ) and Equivalent Isotropic Displacement Parameters ( $\text{Å}^2 \times 10^3$ ) for 1.  $U_{\text{eq}}$  is defined as 1/3 of the trace of the orthogonalised  $U_{ij}$  tensor.

| Atom | x          | y         | z          | U(eq)     |
|------|------------|-----------|------------|-----------|
| Pd1  | 4327.2(2)  | 3843.7(2) | 3405.9(2)  | 11.22(3)  |
| Cl1  | 7111.9(4)  | 4025.7(2) | 4731.1(4)  | 17.27(6)  |
| N1   | 3651.3(13) | 4480.2(3) | 2341.7(12) | 13.8(2)   |
| N2   | 1841.4(13) | 3717.9(3) | 2239.1(11) | 11.58(19) |
| N4   | 2860.1(15) | 3845.7(4) | -657.6(13) | 17.5(2)   |
| N3   | 1523.8(13) | 4525.4(3) | 4432.1(12) | 15.1(2)   |
| C1   | 3625.1(16) | 4535.0(4) | 951.6(14)  | 15.7(2)   |
| C17  | 4870.8(15) | 3208.4(4) | 4069.0(14) | 14.1(2)   |
| C13  | 1278.1(16) | 3550.7(4) | 833.0(13)  | 13.8(2)   |
| C4   | 2643.3(17) | 5210.0(4) | 2267.1(15) | 18.3(2)   |
| C8   | 1382.3(15) | 4049.1(4) | 4375.2(13) | 13.6(2)   |
| C12  | -404.5(16) | 3463.7(4) | 33.7(14)   | 18.1(2)   |
| C2   | 3116.0(17) | 4927.7(4) | 183.1(15)  | 19.0(3)   |
| C5   | 3143.2(15) | 4808.4(4) | 2982.4(14) | 14.4(2)   |

|     |             |           |             |         |
|-----|-------------|-----------|-------------|---------|
| C9  | 747.0(15)   | 3830.3(4) | 2841.8(14)  | 12.6(2) |
| C3  | 2622.2(17)  | 5268.9(4) | 847.2(16)   | 20.5(3) |
| C26 | 1913.1(17)  | 3105.3(4) | 5910.7(15)  | 18.2(2) |
| C16 | 4150.5(16)  | 4156.4(4) | 228.6(15)   | 17.6(2) |
| C21 | 2691.1(16)  | 2953.6(4) | 5001.1(14)  | 15.1(2) |
| C14 | 2504.7(16)  | 3473.6(4) | 114.9(14)   | 15.8(2) |
| C20 | 5348.9(18)  | 2551.9(5) | 5683.5(18)  | 26.2(3) |
| C18 | 4549.4(16)  | 3013.0(4) | 5386.4(15)  | 17.4(2) |
| C24 | -735.0(17)  | 2815.8(5) | 4217.0(17)  | 21.5(3) |
| C6  | 3065.5(16)  | 4724.4(4) | 4490.6(14)  | 15.6(2) |
| C10 | -945.2(16)  | 3748.4(4) | 2076.3(15)  | 16.2(2) |
| C25 | 215.6(18)   | 3041.5(4) | 5510.4(16)  | 20.7(3) |
| C22 | 1705.7(16)  | 2725.6(4) | 3691.9(15)  | 16.8(2) |
| C23 | 25.0(17)    | 2658.3(4) | 3307.4(16)  | 20.1(3) |
| C11 | -1529.3(16) | 3558.8(4) | 664.4(15)   | 18.9(3) |
| C7  | 18.6(17)    | 4753.3(4) | 3460.3(15)  | 19.2(3) |
| C15 | 1398.9(19)  | 4050.2(5) | -1796.0(15) | 22.4(3) |
| C19 | 5427.5(19)  | 3288.7(5) | 6803.6(15)  | 26.4(3) |

Table S7. Bond lengths for 1.

| Atom | Atom | Length/Å   | Atom | Atom | Length/Å   |
|------|------|------------|------|------|------------|
| Pd1  | Cl1  | 2.3268(3)  | C13  | C14  | 1.5187(17) |
| Pd1  | N1   | 2.1750(10) | C4   | C5   | 1.3946(17) |
| Pd1  | N2   | 2.0511(10) | C4   | C3   | 1.3846(19) |
| Pd1  | C17  | 2.0454(12) | C8   | C9   | 1.5212(16) |
| N1   | C1   | 1.3526(16) | C12  | C11  | 1.3863(19) |
| N1   | C5   | 1.3495(16) | C2   | C3   | 1.3865(19) |
| N2   | C13  | 1.3535(15) | C5   | C6   | 1.5167(17) |
| N2   | C9   | 1.3553(15) | C9   | C10  | 1.3909(17) |
| N4   | C16  | 1.4653(17) | C26  | C21  | 1.3963(18) |
| N4   | C14  | 1.4660(16) | C26  | C25  | 1.3942(19) |
| N4   | C15  | 1.4566(17) | C21  | C18  | 1.5307(17) |
| N3   | C8   | 1.4635(16) | C21  | C22  | 1.4039(18) |
| N3   | C6   | 1.4643(16) | C20  | C18  | 1.5521(19) |
| N3   | C7   | 1.4569(16) | C18  | C19  | 1.5335(19) |
| C1   | C2   | 1.3917(18) | C24  | C25  | 1.383(2)   |
| C1   | C16  | 1.5207(18) | C24  | C23  | 1.3906(19) |
| C17  | C18  | 1.5389(17) | C10  | C11  | 1.3851(18) |
| C13  | C12  | 1.3906(18) | C22  | C23  | 1.3840(18) |

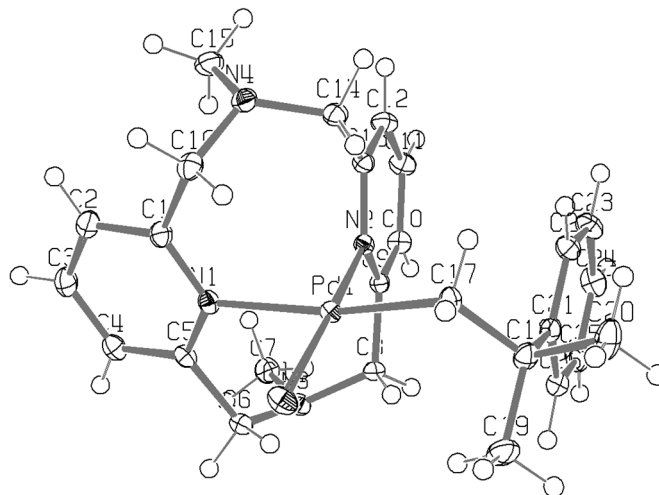

Figure S42. Projection view of **[1]** with 50% thermal ellipsoids.

Table S8. Crystal data and structure refinement for **[1<sup>+</sup>]**.

|                                 |                                                                                      |                  |
|---------------------------------|--------------------------------------------------------------------------------------|------------------|
| Identification code             | 113213/lt/smart/FT-080713                                                            |                  |
| Empirical formula               | C <sub>34</sub> H <sub>51</sub> Cl <sub>3</sub> Li N <sub>4</sub> O <sub>11</sub> Pd |                  |
| Formula weight                  | 911.47                                                                               |                  |
| Temperature                     | 100(2) K                                                                             |                  |
| Wavelength                      | 0.71073 Å                                                                            |                  |
| Crystal system                  | Monoclinic                                                                           |                  |
| Space group                     | P 2 <sub>1</sub> /c                                                                  |                  |
| Unit cell dimensions            | a = 14.0733(11) Å                                                                    | α = 90°.         |
|                                 | b = 18.7386(15) Å                                                                    | β = 109.564(5)°. |
|                                 | c = 15.8690(12) Å                                                                    | γ = 90°.         |
| Volume                          | 3943.3(5) Å <sup>3</sup>                                                             |                  |
| Z                               | 4                                                                                    |                  |
| Density (calculated)            | 1.535 Mg/m <sup>3</sup>                                                              |                  |
| Absorption coefficient          | 0.736 mm <sup>-1</sup>                                                               |                  |
| F(000)                          | 1884                                                                                 |                  |
| Crystal size                    | 0.322 x 0.249 x 0.054 mm <sup>3</sup>                                                |                  |
| Theta range for data collection | 1.742 to 25.403°.                                                                    |                  |
| Index ranges                    | -16 ≤ h ≤ 16, -22 ≤ k ≤ 15, -19 ≤ l ≤ 19                                             |                  |
| Reflections collected           | 45191                                                                                |                  |

|                                   |                                             |
|-----------------------------------|---------------------------------------------|
| Independent reflections           | 7230 [R(int) = 0.1157]                      |
| Completeness to theta = 25.242°   | 100.0 %                                     |
| Absorption correction             | Semi-empirical from equivalents             |
| Max. and min. transmission        | 0.9281 and 0.7625                           |
| Refinement method                 | Full-matrix least-squares on F <sup>2</sup> |
| Data / restraints / parameters    | 7230 / 333 / 502                            |
| Goodness-of-fit on F <sup>2</sup> | 1.011                                       |
| Final R indices [I>2sigma(I)]     | R1 = 0.0578, wR2 = 0.1236                   |
| R indices (all data)              | R1 = 0.1178, wR2 = 0.1533                   |
| Extinction coefficient            | n/a                                         |
| Largest diff. peak and hole       | 1.007 and -0.921 e.Å <sup>-3</sup>          |

Table S9. Atomic coordinates ( x 10<sup>4</sup>) and equivalent isotropic displacement parameters (Å<sup>2</sup>x 10<sup>3</sup>) for [1<sup>+</sup>]. U(eq) is defined as one third of the trace of the orthogonalized U<sup>ij</sup> tensor.

|       | x        | y       | z       | U(eq) |
|-------|----------|---------|---------|-------|
| Pd(1) | 9902(1)  | 6276(1) | 1678(1) | 25(1) |
| Cl(1) | 11003(1) | 5469(1) | 1322(1) | 31(1) |
| N(1)  | 8890(4)  | 6927(3) | 1996(3) | 25(1) |
| N(2)  | 8888(4)  | 5489(3) | 1895(3) | 27(1) |
| N(3)  | 10412(4) | 6141(3) | 3268(3) | 30(1) |
| N(4)  | 8597(4)  | 6296(3) | 335(3)  | 27(1) |
| C(1)  | 8019(5)  | 7082(3) | 1332(4) | 27(2) |
| C(2)  | 7195(5)  | 7346(3) | 1517(4) | 32(2) |
| C(3)  | 7252(5)  | 7412(3) | 2404(5) | 38(2) |

|       |           |          |          |       |
|-------|-----------|----------|----------|-------|
| C(4)  | 8125(5)   | 7203(3)  | 3077(4)  | 30(2) |
| C(5)  | 8933(5)   | 6965(3)  | 2864(4)  | 26(2) |
| C(6)  | 9918(5)   | 6760(3)  | 3540(4)  | 28(2) |
| C(7)  | 9980(5)   | 5451(3)  | 3417(4)  | 34(2) |
| C(8)  | 8964(6)   | 5298(3)  | 2726(4)  | 36(1) |
| C(9)  | 8180(6)   | 4980(3)  | 2919(5)  | 36(1) |
| C(10) | 7304(6)   | 4850(4)  | 2229(5)  | 49(2) |
| C(11) | 7201(6)   | 5069(3)  | 1358(5)  | 40(2) |
| C(12) | 8020(5)   | 5392(3)  | 1222(4)  | 30(2) |
| C(13) | 8019(5)   | 5626(3)  | 319(4)   | 31(2) |
| C(14) | 8037(5)   | 6955(3)  | 398(4)   | 27(2) |
| C(15) | 11502(5)  | 6133(3)  | 3799(4)  | 37(2) |
| C(16) | 8882(5)   | 6326(3)  | -481(4)  | 32(2) |
| C(17) | 10593(5)  | 7123(3)  | 1268(4)  | 30(2) |
| C(18) | 11529(5)  | 7521(3)  | 1824(4)  | 27(2) |
| C(19) | 11697(5)  | 8104(3)  | 1203(4)  | 35(2) |
| C(20) | 12449(5)  | 7021(4)  | 2089(4)  | 37(2) |
| C(21) | 11384(5)  | 7919(3)  | 2623(4)  | 28(2) |
| C(22) | 12130(5)  | 7933(3)  | 3465(4)  | 30(2) |
| C(23) | 12002(5)  | 8319(3)  | 4165(4)  | 32(2) |
| C(24) | 11132(5)  | 8709(3)  | 4029(4)  | 33(2) |
| C(25) | 10383(5)  | 8713(3)  | 3196(4)  | 33(2) |
| C(26) | 10517(5)  | 8321(3)  | 2507(4)  | 31(2) |
| Cl(2) | 8021(1)   | 9050(1)  | 212(1)   | 38(1) |
| O(1)  | 8185(10)  | 9033(6)  | 1166(3)  | 49(2) |
| O(2)  | 7294(4)   | 8515(3)  | -217(4)  | 47(2) |
| O(3)  | 7650(6)   | 9741(2)  | -99(4)   | 80(2) |
| O(4)  | 8964(4)   | 8863(4)  | 113(4)   | 78(2) |
| O(1') | 8310(150) | 9000(80) | 1169(8)  | 49(2) |
| O(2') | 7250(50)  | 8790(30) | -580(30) | 47(2) |
| O(3') | 8510(60)  | 9660(30) | -10(40)  | 80(2) |
| O(4') | 7740(50)  | 9000(60) | -748(8)  | 78(2) |
| Cl(3) | 5234(1)   | 8449(1)  | 3890(1)  | 45(1) |
| O(5)  | 6012(3)   | 8597(2)  | 3489(3)  | 40(1) |
| O(6)  | 4270(4)   | 8509(4)  | 3212(4)  | 68(2) |
| O(7)  | 5411(5)   | 7741(3)  | 4255(5)  | 70(2) |

|       |          |          |          |        |
|-------|----------|----------|----------|--------|
| O(8)  | 5373(7)  | 8960(4)  | 4594(5)  | 92(3)  |
| O(6') | 4500(20) | 9004(15) | 3560(20) | 68(2)  |
| O(7') | 5740(30) | 8520(20) | 4839(8)  | 70(2)  |
| O(8') | 4860(30) | 7782(13) | 3450(30) | 92(3)  |
| Li(1) | 5973(9)  | 9247(7)  | 2487(8)  | 43(2)  |
| O(9)  | 5305(4)  | 10104(3) | 2688(4)  | 59(2)  |
| O(10) | 5272(4)  | 8787(3)  | 1378(3)  | 58(2)  |
| O(11) | 7258(4)  | 9484(3)  | 2387(3)  | 48(1)  |
| C(27) | 5655(8)  | 10525(4) | 3512(6)  | 73(3)  |
| C(28) | 5104(7)  | 11221(5) | 3309(6)  | 71(2)  |
| C(29) | 4653(10) | 11232(6) | 2322(7)  | 104(4) |
| C(30) | 4863(10) | 10564(5) | 1963(6)  | 105(4) |
| C(31) | 4382(7)  | 8365(6)  | 1257(6)  | 88(2)  |
| C(32) | 3965(8)  | 8165(6)  | 356(6)   | 88(2)  |
| C(33) | 4328(7)  | 8728(5)  | -144(5)  | 67(2)  |
| C(34) | 5312(6)  | 8970(5)  | 515(5)   | 54(2)  |

---

Table S10. Bond lengths [Å] for [1<sup>+</sup>].

---

|             |            |            |          |
|-------------|------------|------------|----------|
| Pd(1)-N(1)  | 2.061(5)   | N(3)-C(6)  | 1.488(7) |
| Pd(1)-C(17) | 2.076(6)   | N(4)-C(16) | 1.479(7) |
| Pd(1)-N(2)  | 2.158(5)   | N(4)-C(14) | 1.486(7) |
| Pd(1)-N(4)  | 2.301(5)   | N(4)-C(13) | 1.492(8) |
| Pd(1)-Cl(1) | 2.3667(16) | C(1)-C(2)  | 1.380(8) |
| Pd(1)-N(3)  | 2.394(5)   | C(1)-C(14) | 1.509(8) |
| N(1)-C(1)   | 1.353(8)   | C(2)-C(3)  | 1.388(9) |
| N(1)-C(5)   | 1.361(7)   | C(2)-H(2)  | 0.9500   |
| N(2)-C(8)   | 1.336(7)   | C(3)-C(4)  | 1.387(9) |
| N(2)-C(12)  | 1.338(8)   | C(3)-H(3)  | 0.9500   |
| N(3)-C(7)   | 1.481(8)   | C(4)-C(5)  | 1.365(8) |
| N(3)-C(15)  | 1.483(8)   | C(4)-H(4)  | 0.9500   |

|              |           |              |           |
|--------------|-----------|--------------|-----------|
| C(5)-C(6)    | 1.492(9)  | C(21)-C(26)  | 1.393(9)  |
| C(6)-H(6A)   | 0.9900    | C(21)-C(22)  | 1.396(9)  |
| C(6)-H(6B)   | 0.9900    | C(22)-C(23)  | 1.387(8)  |
| C(7)-C(8)    | 1.509(9)  | C(22)-H(22)  | 0.9500    |
| C(7)-H(7A)   | 0.9900    | C(23)-C(24)  | 1.380(9)  |
| C(7)-H(7B)   | 0.9900    | C(23)-H(23)  | 0.9500    |
| C(8)-C(9)    | 1.377(9)  | C(24)-C(25)  | 1.388(9)  |
| C(9)-C(10)   | 1.370(10) | C(24)-H(24)  | 0.9500    |
| C(9)-H(9)    | 0.9500    | C(25)-C(26)  | 1.382(8)  |
| C(10)-C(11)  | 1.402(9)  | C(25)-H(25)  | 0.9500    |
| C(10)-H(10)  | 0.9500    | C(26)-H(26)  | 0.9500    |
| C(11)-C(12)  | 1.382(9)  | Cl(2)-O(3)   | 1.421(5)  |
| C(11)-H(11)  | 0.9500    | Cl(2)-O(4)   | 1.431(5)  |
| C(12)-C(13)  | 1.497(8)  | Cl(2)-O(2)   | 1.432(4)  |
| C(13)-H(13A) | 0.9900    | Cl(2)-O(2')  | 1.437(8)  |
| C(13)-H(13B) | 0.9900    | Cl(2)-O(1')  | 1.438(8)  |
| C(14)-H(14A) | 0.9900    | Cl(2)-O(3')  | 1.440(8)  |
| C(14)-H(14B) | 0.9900    | Cl(2)-O(4')  | 1.443(8)  |
| C(15)-H(15A) | 0.9800    | Cl(2)-O(1)   | 1.454(4)  |
| C(15)-H(15B) | 0.9800    | Cl(3)-O(6)   | 1.426(5)  |
| C(15)-H(15C) | 0.9800    | Cl(3)-O(7)   | 1.434(5)  |
| C(16)-H(16A) | 0.9800    | Cl(3)-O(8)   | 1.434(5)  |
| C(16)-H(16B) | 0.9800    | Cl(3)-O(6')  | 1.439(8)  |
| C(16)-H(16C) | 0.9800    | Cl(3)-O(7')  | 1.440(8)  |
| C(17)-C(18)  | 1.514(9)  | Cl(3)-O(8')  | 1.442(8)  |
| C(17)-H(17A) | 0.9900    | Cl(3)-O(5)   | 1.466(4)  |
| C(17)-H(17B) | 0.9900    | O(5)-Li(1)   | 1.989(13) |
| C(18)-C(20)  | 1.538(9)  | Li(1)-O(10)  | 1.910(13) |
| C(18)-C(21)  | 1.541(8)  | Li(1)-O(11)  | 1.920(13) |
| C(18)-C(19)  | 1.542(8)  | Li(1)-O(9)   | 1.940(13) |
| C(19)-H(19A) | 0.9800    | O(9)-C(30)   | 1.405(10) |
| C(19)-H(19B) | 0.9800    | O(9)-C(27)   | 1.464(10) |
| C(19)-H(19C) | 0.9800    | O(10)-C(34)  | 1.431(8)  |
| C(20)-H(20A) | 0.9800    | O(10)-C(31)  | 1.438(9)  |
| C(20)-H(20B) | 0.9800    | O(11)-H(11A) | 0.8710    |
| C(20)-H(20C) | 0.9800    | O(11)-H(11B) | 0.8713    |

|              |           |              |           |
|--------------|-----------|--------------|-----------|
| C(27)-C(28)  | 1.496(11) | C(31)-H(31A) | 0.9900    |
| C(27)-H(27A) | 0.9900    | C(31)-H(31B) | 0.9900    |
| C(27)-H(27B) | 0.9900    | C(32)-C(33)  | 1.508(11) |
| C(28)-C(29)  | 1.480(13) | C(32)-H(32A) | 0.9900    |
| C(28)-H(28A) | 0.9900    | C(32)-H(32B) | 0.9900    |
| C(28)-H(28B) | 0.9900    | C(33)-C(34)  | 1.499(11) |
| C(29)-C(30)  | 1.447(12) | C(33)-H(33A) | 0.9900    |
| C(29)-H(29A) | 0.9900    | C(33)-H(33B) | 0.9900    |
| C(29)-H(29B) | 0.9900    | C(34)-H(34A) | 0.9900    |
| C(30)-H(30A) | 0.9900    | C(34)-H(34B) | 0.9900    |
| C(30)-H(30B) | 0.9900    |              |           |
| C(31)-C(32)  | 1.403(11) |              |           |

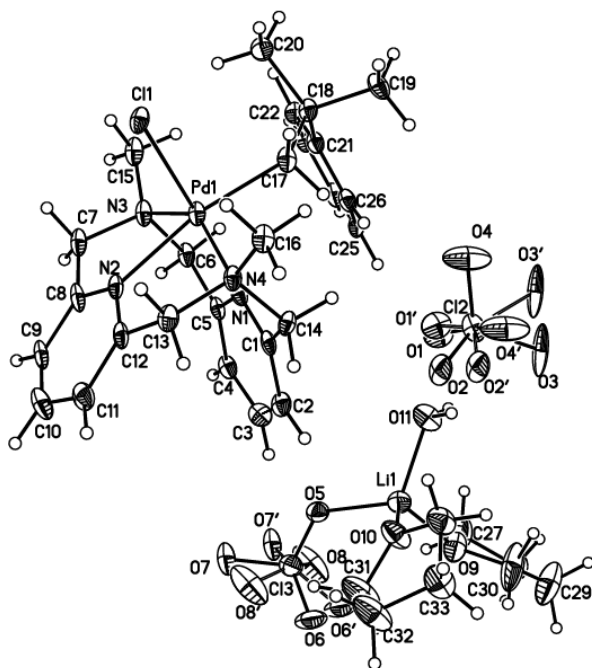

Figure S43. Projection view of  $[1^+]$  with 30% thermal ellipsoids (disorder component omitted for clarity)



Table S11. Crystal data and structure refinement for [2].

|                                             |                                                               |
|---------------------------------------------|---------------------------------------------------------------|
| Identification code                         | 1                                                             |
| Empirical formula                           | C <sub>26</sub> H <sub>32</sub> N <sub>4</sub> Pd             |
| Formula weight                              | 506.95                                                        |
| Temperature/K                               | 100.0                                                         |
| Crystal system                              | orthorhombic                                                  |
| Space group                                 | P2 <sub>1</sub> 2 <sub>1</sub> 2 <sub>1</sub>                 |
| a/Å                                         | 8.9688(3)                                                     |
| b/Å                                         | 15.8749(6)                                                    |
| c/Å                                         | 16.3925(5)                                                    |
| α/°                                         | 90                                                            |
| β/°                                         | 90                                                            |
| γ/°                                         | 90                                                            |
| Volume/Å <sup>3</sup>                       | 2333.94(14)                                                   |
| Z                                           | 4                                                             |
| ρ <sub>calc</sub> /cm <sup>3</sup>          | 1.443                                                         |
| μ/mm <sup>-1</sup>                          | 0.815                                                         |
| F(000)                                      | 1048.0                                                        |
| Crystal size/mm <sup>3</sup>                | 0.215 × 0.084 × 0.065                                         |
| Radiation                                   | MoKα (λ = 0.71073)                                            |
| 2θ range for data collection/°              | 4.542 to 50.048                                               |
| Index ranges                                | -10 ≤ h ≤ 10, -18 ≤ k ≤ 18, -19 ≤ l ≤ 19                      |
| Reflections collected                       | 26114                                                         |
| Independent reflections                     | 4119 [R <sub>int</sub> = 0.0359, R <sub>sigma</sub> = 0.0238] |
| Data/restraints/parameters                  | 4119/3/285                                                    |
| Goodness-of-fit on F <sup>2</sup>           | 1.379                                                         |
| Final R indexes [I ≥ 2σ (I)]                | R <sub>1</sub> = 0.0396, wR <sub>2</sub> = 0.0931             |
| Final R indexes [all data]                  | R <sub>1</sub> = 0.0403, wR <sub>2</sub> = 0.0940             |
| Largest diff. peak/hole / e Å <sup>-3</sup> | 0.60/-1.23                                                    |
| Flack parameter                             | 0.007(12)                                                     |

Table S12. Fractional Atomic Coordinates (×10<sup>4</sup>) and Equivalent Isotropic Displacement Parameters (Å<sup>2</sup>×10<sup>3</sup>) for [2]. U<sub>eq</sub> is defined as 1/3 of the trace of the orthogonalised U<sub>ij</sub> tensor.

| Atom | x         | y         | z         | U(eq)     |
|------|-----------|-----------|-----------|-----------|
| Pd1  | 8565.8(7) | 4103.8(4) | 6070.7(3) | 14.63(14) |
| N1   | 6468(9)   | 3926(4)   | 5440(3)   | 17.5(14)  |
| N2   | 8731(8)   | 5060(4)   | 5139(4)   | 17.4(14)  |
| N3   | 5855(8)   | 5850(5)   | 6198(4)   | 27.9(16)  |
| N4   | 8873(9)   | 3310(5)   | 3987(5)   | 37(2)     |

|     |           |         |         |          |
|-----|-----------|---------|---------|----------|
| C1  | 7818(13)  | 2931(6) | 4562(6) | 36(3)    |
| C2  | 6449(13)  | 3439(5) | 4759(4) | 23.6(18) |
| C3  | 5197(12)  | 3400(6) | 4261(5) | 33(3)    |
| C4  | 3984(11)  | 3878(7) | 4449(5) | 39(3)    |
| C5  | 3982(10)  | 4383(7) | 5137(5) | 35(3)    |
| C6  | 5257(10)  | 4401(6) | 5619(5) | 23(2)    |
| C7  | 5381(10)  | 4983(6) | 6348(5) | 27(2)    |
| C8  | 4911(12)  | 6322(7) | 5633(6) | 36(3)    |
| C9  | 7449(9)   | 6008(5) | 6093(6) | 25.3(18) |
| C10 | 8141(9)   | 5822(6) | 5262(5) | 20.0(17) |
| C11 | 8076(11)  | 6413(6) | 4638(6) | 30(2)    |
| C12 | 8613(11)  | 6226(6) | 3877(6) | 34(2)    |
| C13 | 9215(11)  | 5432(7) | 3756(5) | 33(2)    |
| C14 | 9261(10)  | 4852(7) | 4392(5) | 28(2)    |
| C15 | 9869(11)  | 3966(7) | 4273(5) | 37(3)    |
| C16 | 8225(13)  | 3474(7) | 3171(5) | 42(3)    |
| C17 | 8465(11)  | 3229(4) | 6943(4) | 15.5(15) |
| C18 | 7419(9)   | 2554(5) | 6983(5) | 16.1(17) |
| C19 | 7516(10)  | 1950(5) | 7589(5) | 22.6(19) |
| C20 | 8655(12)  | 1983(5) | 8171(5) | 24.4(18) |
| C21 | 9655(10)  | 2653(5) | 8155(5) | 21.4(19) |
| C22 | 9563(9)   | 3261(5) | 7555(5) | 14.0(17) |
| C23 | 10559(9)  | 4026(6) | 7506(4) | 15.9(16) |
| C24 | 10603(9)  | 4280(5) | 6599(5) | 17.9(19) |
| C25 | 9810(11)  | 4756(6) | 7982(5) | 24(2)    |
| C26 | 12143(10) | 3911(7) | 7853(6) | 32(3)    |

Table S13. Bond Lengths for [2].

| Atom | Atom | Length/Å  | Atom | Atom | Length/Å  |
|------|------|-----------|------|------|-----------|
| Pd1  | N1   | 2.165(8)  | C5   | C6   | 1.391(12) |
| Pd1  | N2   | 2.158(6)  | C6   | C7   | 1.515(12) |
| Pd1  | C17  | 1.996(7)  | C9   | C10  | 1.525(12) |
| Pd1  | C24  | 2.042(8)  | C10  | C11  | 1.390(12) |
| N1   | C2   | 1.358(9)  | C11  | C12  | 1.370(14) |
| N1   | C6   | 1.354(12) | C12  | C13  | 1.385(14) |
| N2   | C10  | 1.336(11) | C13  | C14  | 1.392(13) |
| N2   | C14  | 1.354(11) | C14  | C15  | 1.521(15) |
| N3   | C7   | 1.461(13) | C17  | C18  | 1.426(12) |
| N3   | C8   | 1.461(11) | C17  | C22  | 1.406(11) |

|    |     |           |     |     |           |
|----|-----|-----------|-----|-----|-----------|
| N3 | C9  | 1.462(11) | C18 | C19 | 1.383(11) |
| N4 | C1  | 1.465(14) | C19 | C20 | 1.399(13) |
| N4 | C15 | 1.449(14) | C20 | C21 | 1.391(13) |
| N4 | C16 | 1.482(11) | C21 | C22 | 1.381(11) |
| C1 | C2  | 1.503(15) | C22 | C23 | 1.510(11) |
| C2 | C3  | 1.390(14) | C23 | C24 | 1.541(10) |
| C3 | C4  | 1.362(15) | C23 | C25 | 1.551(12) |
| C4 | C5  | 1.383(14) | C23 | C26 | 1.541(11) |

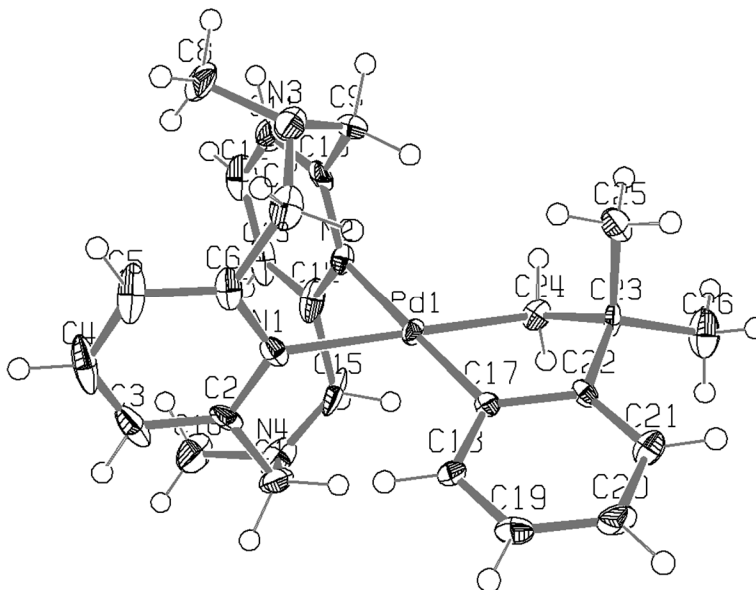

Figure S44. Projection view of **[2]** with 50% thermal ellipsoids

Table S14. Crystal data and structure refinement for **[2<sup>+</sup>]**.

|                      |                                                                     |          |
|----------------------|---------------------------------------------------------------------|----------|
| Identification code  | 15213/lt/x8/100K/FT-041713-cyclo                                    |          |
| Empirical formula    | C <sub>28</sub> H <sub>35</sub> Cl N <sub>5</sub> O <sub>4</sub> Pd |          |
| Formula weight       | 647.46                                                              |          |
| Temperature          | 100(2) K                                                            |          |
| Wavelength           | 0.71073 Å                                                           |          |
| Crystal system       | Orthorhombic                                                        |          |
| Space group          | P 2 <sub>1</sub> 2 <sub>1</sub> 2 <sub>1</sub>                      |          |
| Unit cell dimensions | a = 11.3400(10) Å                                                   | α = 90°. |
|                      | b = 12.2808(10) Å                                                   | β = 90°. |
|                      | c = 20.326(2) Å                                                     | γ = 90°. |
| Volume               | 2830.7(4) Å <sup>3</sup>                                            |          |

|                                   |                                             |
|-----------------------------------|---------------------------------------------|
| Z                                 | 4                                           |
| Density (calculated)              | 1.519 Mg/m <sup>3</sup>                     |
| Absorption coefficient            | 0.793 mm <sup>-1</sup>                      |
| F(000)                            | 1332                                        |
| Crystal size                      | 0.331 x 0.218 x 0.069 mm <sup>3</sup>       |
| Theta range for data collection   | 1.937 to 28.412°.                           |
| Index ranges                      | -15 ≤ h ≤ 15, -16 ≤ k ≤ 16, -27 ≤ l ≤ 27    |
| Reflections collected             | 53968                                       |
| Independent reflections           | 7095 [R(int) = 0.0557]                      |
| Completeness to theta = 25.242°   | 100.0 %                                     |
| Absorption correction             | Semi-empirical from equivalents             |
| Max. and min. transmission        | 0.9583 and 0.8697                           |
| Refinement method                 | Full-matrix least-squares on F <sup>2</sup> |
| Data / restraints / parameters    | 7095 / 48 / 370                             |
| Goodness-of-fit on F <sup>2</sup> | 1.018                                       |
| Final R indices [I > 2σ(I)]       | R1 = 0.0249, wR2 = 0.0508                   |
| R indices (all data)              | R1 = 0.0290, wR2 = 0.0524                   |
| Absolute structure parameter      | -0.022(10)                                  |
| Extinction coefficient            | n/a                                         |
| Largest diff. peak and hole       | 0.286 and -0.492 e.Å <sup>-3</sup>          |

Table S15. Atomic coordinates ( x 10<sup>4</sup>) and equivalent isotropic displacement parameters (Å<sup>2</sup>x 10<sup>3</sup>) for [2<sup>+</sup>]. U(eq) is defined as one third of the trace of the orthogonalized U<sup>ij</sup> tensor.

|       | x        | y        | z        | U(eq) |
|-------|----------|----------|----------|-------|
| Pd(1) | 9126(1)  | 9544(1)  | 1730(1)  | 10(1) |
| Cl(1) | 6450(1)  | 3350(1)  | 1078(1)  | 18(1) |
| O(1)  | 6387(8)  | 3556(6)  | 1768(2)  | 36(2) |
| O(2)  | 6519(6)  | 4336(2)  | 696(2)   | 31(1) |
| O(3)  | 7500(4)  | 2743(6)  | 954(3)   | 49(1) |
| O(4)  | 5431(6)  | 2736(4)  | 890(3)   | 45(1) |
| O(1') | 6320(80) | 3810(60) | 1713(17) | 36(2) |
| O(2') | 6040(50) | 4367(19) | 840(20)  | 31(1) |

|       |          |          |         |       |
|-------|----------|----------|---------|-------|
| O(3') | 7650(20) | 3140(50) | 970(30) | 49(1) |
| O(4') | 5820(50) | 2540(30) | 730(20) | 45(1) |
| N(1)  | 10563(2) | 8595(2)  | 1337(1) | 12(1) |
| N(2)  | 10509(2) | 10737(2) | 1649(1) | 12(1) |
| N(3)  | 9101(2)  | 9973(2)  | 604(1)  | 15(1) |
| N(4)  | 10346(2) | 9203(2)  | 2663(1) | 14(1) |
| C(1)  | 11380(3) | 8244(2)  | 1763(2) | 14(1) |
| C(2)  | 12498(3) | 7943(3)  | 1551(2) | 20(1) |
| C(3)  | 12761(3) | 8034(3)  | 890(2)  | 24(1) |
| C(4)  | 11920(3) | 8426(3)  | 460(2)  | 22(1) |
| C(5)  | 10819(3) | 8705(2)  | 702(2)  | 15(1) |
| C(6)  | 9821(3)  | 9116(3)  | 279(2)  | 17(1) |
| C(7)  | 9657(3)  | 11067(3) | 579(2)  | 16(1) |
| C(8)  | 10672(3) | 11183(2) | 1055(2) | 13(1) |
| C(9)  | 11704(3) | 11726(3) | 904(2)  | 18(1) |
| C(10) | 12575(3) | 11801(3) | 1379(2) | 20(1) |
| C(11) | 12416(3) | 11303(3) | 1977(2) | 17(1) |
| C(12) | 11368(3) | 10751(2) | 2100(2) | 14(1) |
| C(13) | 11120(3) | 10168(2) | 2730(2) | 17(1) |
| C(14) | 11006(3) | 8210(2)  | 2466(2) | 16(1) |
| C(15) | 7932(3)  | 10024(3) | 293(2)  | 22(1) |
| C(16) | 9753(3)  | 8978(3)  | 3289(2) | 19(1) |
| C(17) | 7807(2)  | 8472(2)  | 1713(2) | 13(1) |
| C(18) | 7902(3)  | 7468(3)  | 1402(2) | 15(1) |
| C(19) | 6918(3)  | 6792(3)  | 1341(2) | 18(1) |
| C(20) | 5844(3)  | 7125(3)  | 1588(2) | 22(1) |
| C(21) | 5740(3)  | 8122(3)  | 1903(2) | 22(1) |
| C(22) | 6715(3)  | 8801(3)  | 1965(2) | 15(1) |
| C(23) | 6680(3)  | 9903(2)  | 2296(2) | 15(1) |
| C(24) | 7823(2)  | 10510(3) | 2109(2) | 17(1) |
| C(25) | 5612(3)  | 10572(3) | 2070(2) | 25(1) |
| C(26) | 6608(3)  | 9736(3)  | 3041(2) | 20(1) |
| N(1S) | 10104(3) | 6158(3)  | 446(2)  | 44(1) |
| C(1S) | 9773(3)  | 5413(3)  | 179(2)  | 26(1) |
| C(2S) | 9321(3)  | 4459(3)  | -151(2) | 38(1) |

Table S16. Bond lengths [Å] for [2<sup>+</sup>].

|             |           |              |          |
|-------------|-----------|--------------|----------|
| Pd(1)-C(17) | 1.994(3)  | C(4)-H(4)    | 0.9500   |
| Pd(1)-C(24) | 2.045(3)  | C(5)-C(6)    | 1.508(5) |
| Pd(1)-N(2)  | 2.152(2)  | C(6)-H(6A)   | 0.9900   |
| Pd(1)-N(1)  | 2.156(2)  | C(6)-H(6B)   | 0.9900   |
| Pd(1)-N(3)  | 2.350(2)  | C(7)-C(8)    | 1.510(4) |
| Pd(1)-N(4)  | 2.383(3)  | C(7)-H(7A)   | 0.9900   |
| Cl(1)-O(3') | 1.41(2)   | C(7)-H(7B)   | 0.9900   |
| Cl(1)-O(2') | 1.416(18) | C(8)-C(9)    | 1.382(4) |
| Cl(1)-O(1') | 1.42(2)   | C(9)-C(10)   | 1.385(5) |
| Cl(1)-O(4') | 1.419(19) | C(9)-H(9)    | 0.9500   |
| Cl(1)-O(1)  | 1.426(4)  | C(10)-C(11)  | 1.371(5) |
| Cl(1)-O(3)  | 1.427(3)  | C(10)-H(10)  | 0.9500   |
| Cl(1)-O(4)  | 1.431(3)  | C(11)-C(12)  | 1.392(4) |
| Cl(1)-O(2)  | 1.440(3)  | C(11)-H(11)  | 0.9500   |
| N(1)-C(5)   | 1.331(4)  | C(12)-C(13)  | 1.494(4) |
| N(1)-C(1)   | 1.339(4)  | C(13)-H(13A) | 0.9900   |
| N(2)-C(12)  | 1.338(4)  | C(13)-H(13B) | 0.9900   |
| N(2)-C(8)   | 1.338(4)  | C(14)-H(14A) | 0.9900   |
| N(3)-C(15)  | 1.470(4)  | C(14)-H(14B) | 0.9900   |
| N(3)-C(6)   | 1.486(4)  | C(15)-H(15A) | 0.9800   |
| N(3)-C(7)   | 1.486(4)  | C(15)-H(15B) | 0.9800   |
| N(4)-C(16)  | 1.466(4)  | C(15)-H(15C) | 0.9800   |
| N(4)-C(13)  | 1.482(4)  | C(16)-H(16A) | 0.9800   |
| N(4)-C(14)  | 1.485(4)  | C(16)-H(16B) | 0.9800   |
| C(1)-C(2)   | 1.389(4)  | C(16)-H(16C) | 0.9800   |
| C(1)-C(14)  | 1.491(5)  | C(17)-C(18)  | 1.389(4) |
| C(2)-C(3)   | 1.380(5)  | C(17)-C(22)  | 1.399(4) |
| C(2)-H(2)   | 0.9500    | C(18)-C(19)  | 1.396(4) |
| C(3)-C(4)   | 1.381(5)  | C(18)-H(18)  | 0.9500   |
| C(3)-H(3)   | 0.9500    | C(19)-C(20)  | 1.379(5) |
| C(4)-C(5)   | 1.385(5)  | C(19)-H(19)  | 0.9500   |

|              |          |              |          |
|--------------|----------|--------------|----------|
| C(20)-C(21)  | 1.387(5) | C(25)-H(25B) | 0.9800   |
| C(20)-H(20)  | 0.9500   | C(25)-H(25C) | 0.9800   |
| C(21)-C(22)  | 1.391(4) | C(26)-H(26A) | 0.9800   |
| C(21)-H(21)  | 0.9500   | C(26)-H(26B) | 0.9800   |
| C(22)-C(23)  | 1.512(4) | C(26)-H(26C) | 0.9800   |
| C(23)-C(26)  | 1.531(4) | N(1S)-C(1S)  | 1.129(5) |
| C(23)-C(25)  | 1.534(4) | C(1S)-C(2S)  | 1.445(5) |
| C(23)-C(24)  | 1.544(4) | C(2S)-H(2SA) | 0.9800   |
| C(24)-H(24A) | 0.9900   | C(2S)-H(2SB) | 0.9800   |
| C(24)-H(24B) | 0.9900   | C(2S)-H(2SC) | 0.9800   |
| C(25)-H(25A) | 0.9800   |              |          |

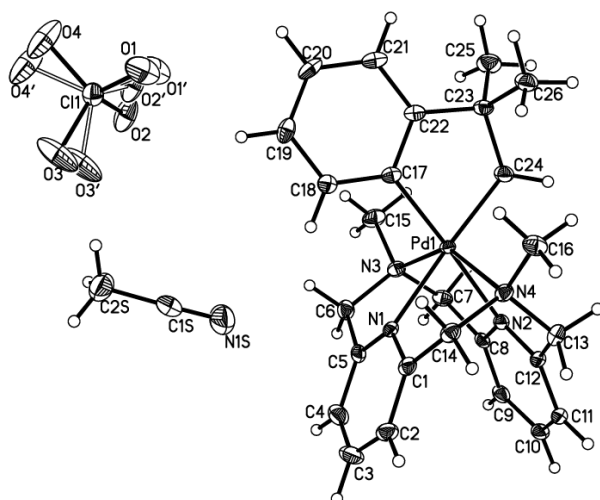

Figure S45. Projection view of  $[2^+]$  with 50% thermal ellipsoids.

Table S17. Crystal data and structure refinement for  $[2^+]$ .

|                     |                                                                                  |
|---------------------|----------------------------------------------------------------------------------|
| Identification code | 16813/lt/x8/173K/FT-0515-1                                                       |
| Empirical formula   | C <sub>30</sub> H <sub>38</sub> Cl <sub>2</sub> N <sub>6</sub> O <sub>8</sub> Pd |
| Formula weight      | 787.96                                                                           |
| Temperature         | 173(2) K                                                                         |
| Wavelength          | 0.71073 Å                                                                        |

|                                   |                                                                                                   |
|-----------------------------------|---------------------------------------------------------------------------------------------------|
| Crystal system                    | Orthorhombic                                                                                      |
| Space group                       | P m n 2 <sub>1</sub>                                                                              |
| Unit cell dimensions              | a = 17.1932(5) Å      α = 90°.<br>b = 11.4548(3) Å      β = 90°.<br>c = 8.6473(3) Å      γ = 90°. |
| Volume                            | 1703.04(9) Å <sup>3</sup>                                                                         |
| Z                                 | 2                                                                                                 |
| Density (calculated)              | 1.537 Mg/m <sup>3</sup>                                                                           |
| Absorption coefficient            | 0.759 mm <sup>-1</sup>                                                                            |
| F(000)                            | 808                                                                                               |
| Crystal size                      | 0.354 x 0.316 x 0.092 mm <sup>3</sup>                                                             |
| Theta range for data collection   | 2.136 to 31.074°.                                                                                 |
| Index ranges                      | -24 ≤ h ≤ 24, -16 ≤ k ≤ 16, -12 ≤ l ≤ 11                                                          |
| Reflections collected             | 37189                                                                                             |
| Independent reflections           | 5494 [R(int) = 0.0439]                                                                            |
| Completeness to theta = 25.242°   | 99.9 %                                                                                            |
| Absorption correction             | Semi-empirical from equivalents                                                                   |
| Max. and min. transmission        | 0.7462 and 0.6809                                                                                 |
| Refinement method                 | Full-matrix least-squares on F <sup>2</sup>                                                       |
| Data / restraints / parameters    | 5494 / 7 / 234                                                                                    |
| Goodness-of-fit on F <sup>2</sup> | 1.049                                                                                             |
| Final R indices [I > 2σ(I)]       | R1 = 0.0267, wR2 = 0.0610                                                                         |
| R indices (all data)              | R1 = 0.0314, wR2 = 0.0634                                                                         |
| Absolute structure parameter      | 0.028(10)                                                                                         |
| Extinction coefficient            | n/a                                                                                               |
| Largest diff. peak and hole       | 0.700 and -0.453 e.Å <sup>-3</sup>                                                                |

Table S18. Atomic coordinates ( x 10<sup>4</sup>) and equivalent isotropic displacement parameters (Å<sup>2</sup>x 10<sup>3</sup>) for [2<sup>2+</sup>]. U(eq) is defined as one third of the trace of the orthogonalized U<sup>ij</sup> tensor.

|       | x       | y       | z       | U(eq) |
|-------|---------|---------|---------|-------|
| Pd(1) | 10000   | 6481(1) | 233(1)  | 17(1) |
| Cl(1) | 7810(1) | 7094(1) | 5416(1) | 33(1) |



|       |         |         |          |       |
|-------|---------|---------|----------|-------|
| O(1)  | 7122(2) | 7099(3) | 6323(5)  | 75(1) |
| O(2)  | 8101(2) | 5917(2) | 5387(4)  | 56(1) |
| O(3)  | 7629(2) | 7417(2) | 3875(3)  | 53(1) |
| O(4)  | 8350(2) | 7877(3) | 6074(4)  | 70(1) |
| N(1)  | 10000   | 5207(4) | 1923(5)  | 22(1) |
| N(2)  | 10000   | 5052(4) | -1218(5) | 20(1) |
| N(3)  | 8789(1) | 6091(2) | 280(4)   | 22(1) |
| C(1)  | 9316(2) | 4749(3) | 2330(4)  | 23(1) |
| C(2)  | 8640(2) | 5470(3) | 1795(4)  | 25(1) |
| C(3)  | 8638(2) | 5291(3) | -1076(5) | 28(1) |
| C(4)  | 9316(2) | 4525(3) | -1437(4) | 23(1) |
| C(5)  | 9297(2) | 3760(3) | 3246(4)  | 30(1) |
| C(6)  | 10000   | 3284(4) | 3697(6)  | 33(1) |
| C(7)  | 9295(2) | 3395(3) | -2024(4) | 31(1) |
| C(8)  | 10000   | 2855(4) | -2326(5) | 34(1) |
| C(9)  | 10000   | 7859(5) | 1669(6)  | 21(1) |
| C(10) | 10000   | 7734(4) | 3267(5)  | 27(1) |
| C(11) | 10000   | 8719(4) | 4184(5)  | 31(1) |
| C(12) | 8215(1) | 7065(2) | 194(5)   | 30(1) |
| C(13) | 10000   | 9925(4) | 1924(6)  | 30(1) |
| C(14) | 10000   | 8946(4) | 957(6)   | 21(1) |
| C(15) | 10000   | 9016(4) | -788(6)  | 23(1) |
| C(16) | 10000   | 7746(4) | -1454(6) | 21(1) |
| C(17) | 9274(2) | 9678(2) | -1340(4) | 33(1) |
| C(18) | 10000   | 9814(4) | 3511(6)  | 32(1) |
| N(1S) | 6558(2) | 8565(2) | 10268(8) | 54(1) |
| C(1S) | 6776(2) | 9126(3) | 9275(5)  | 42(1) |
| C(2S) | 7047(2) | 9830(3) | 7980(6)  | 51(1) |

Table S19. Bond lengths [ $\text{\AA}$ ] for  $[\mathbf{2}^{2+}]$ .

|             |          |              |            |
|-------------|----------|--------------|------------|
| Pd(1)-C(9)  | 2.008(5) | Pd(1)-N(3)   | 2.1305(18) |
| Pd(1)-C(16) | 2.056(5) | Pd(1)-N(3)#1 | 2.1305(18) |
| Pd(1)-N(2)  | 2.063(4) | Cl(1)-O(4)   | 1.410(3)   |
| Pd(1)-N(1)  | 2.066(4) | Cl(1)-O(3)   | 1.417(3)   |

|             |          |               |          |
|-------------|----------|---------------|----------|
| Cl(1)-O(1)  | 1.421(3) | C(9)-C(10)    | 1.390(6) |
| Cl(1)-O(2)  | 1.438(2) | C(10)-C(11)   | 1.379(6) |
| N(1)-C(1)   | 1.335(4) | C(10)-H(10)   | 0.9500   |
| N(1)-C(1)#1 | 1.335(4) | C(11)-C(18)   | 1.383(6) |
| N(2)-C(4)#1 | 1.335(4) | C(11)-H(11)   | 0.9500   |
| N(2)-C(4)   | 1.335(4) | C(12)-H(12A)  | 0.9800   |
| N(3)-C(12)  | 1.490(3) | C(12)-H(12B)  | 0.9800   |
| N(3)-C(3)   | 1.511(5) | C(12)-H(12C)  | 0.9800   |
| N(3)-C(2)   | 1.513(5) | C(13)-C(18)   | 1.378(7) |
| C(1)-C(5)   | 1.382(4) | C(13)-C(14)   | 1.399(6) |
| C(1)-C(2)   | 1.500(5) | C(13)-H(13)   | 0.9500   |
| C(2)-H(2A)  | 0.9900   | C(14)-C(15)   | 1.511(6) |
| C(2)-H(2B)  | 0.9900   | C(15)-C(17)#1 | 1.536(4) |
| C(3)-C(4)   | 1.492(5) | C(15)-C(17)   | 1.536(4) |
| C(3)-H(3A)  | 0.9900   | C(15)-C(16)   | 1.565(7) |
| C(3)-H(3B)  | 0.9900   | C(16)-H(16A)  | 0.9900   |
| C(4)-C(7)   | 1.390(4) | C(16)-H(16B)  | 0.9900   |
| C(5)-C(6)   | 1.383(4) | C(17)-H(17A)  | 0.9800   |
| C(5)-H(5)   | 0.9500   | C(17)-H(17B)  | 0.9800   |
| C(6)-C(5)#1 | 1.383(4) | C(17)-H(17C)  | 0.9800   |
| C(6)-H(6)   | 0.9500   | C(18)-H(18)   | 0.9500   |
| C(7)-C(8)   | 1.385(4) | N(1S)-C(1S)   | 1.137(6) |
| C(7)-H(7)   | 0.9500   | C(1S)-C(2S)   | 1.457(6) |
| C(8)-C(7)#1 | 1.385(4) | C(2S)-H(2SA)  | 0.9800   |
| C(8)-H(8)   | 0.9500   | C(2S)-H(2SB)  | 0.9800   |
| C(9)-C(14)  | 1.389(7) | C(2S)-H(2SC)  | 0.9800   |

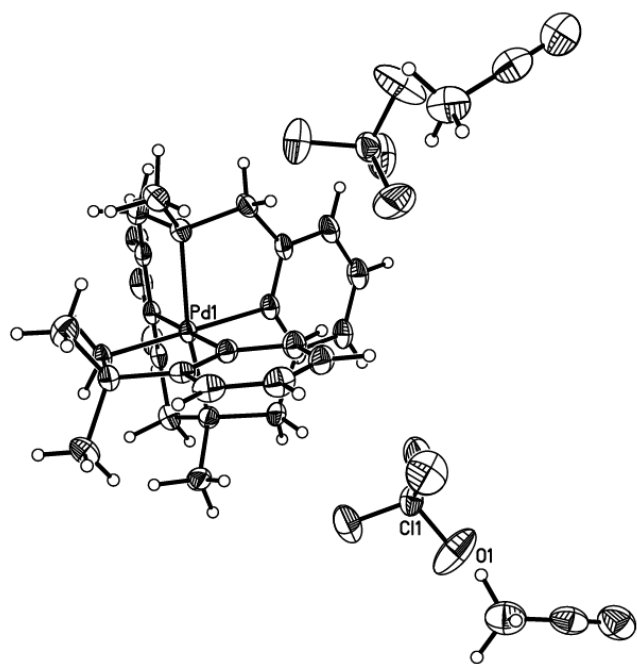

Figure S46. Projection view of  $[2^{2+}](ClO_4)_2$  with 50% thermal ellipsoids.

## VIII. Computational Details

Geometry optimizations and frequency calculations were performed at the M06 level of theory utilizing the Stuttgart/Dresden ECP (SDD) basis set using the Gaussian 16 package.<sup>8-10</sup> Acetonitrile was used as the solvent, and solvation was modeled utilizing the SMD variant of the IEFPCM SCRF model.<sup>11</sup> The C-H activation transition state structures contained imaginary frequencies and exhibited optimized structures consistent with expected cyclic transition states for concerted metalation-deprotonation processes. The kinetic isotope effect for the C-H activation transition state was determined by calculating the  $\Delta G_D^\ddagger - \Delta G_H^\ddagger$  value from the calculated force constants for the protonated and deuterated analogues of the intermediate and the transition state geometries and using that to get the KIE:

$$\text{KIE} = \frac{k_H}{k_D} = e^{-(\Delta G_D^\ddagger - \Delta G_H^\ddagger)/RT}$$

The general reaction profile proceeds as follows: 1) dissociation of axial amines (I  $\rightarrow$  II); 2) rearrangement of the bound acetate from the equatorial to the axial position (II to III via II-TS); 3) the transition state for C-H activation (III  $\rightarrow$  III-TS); 5) loss of acetic acid and formation of the palladacycle 2<sup>+</sup> (III-TS  $\rightarrow$  IV). In addition, a reaction coordinate involving a  $\kappa^2$ -coordination of the Me<sup>c</sup>N4 ligand is calculated and shown to be significantly higher in energy.

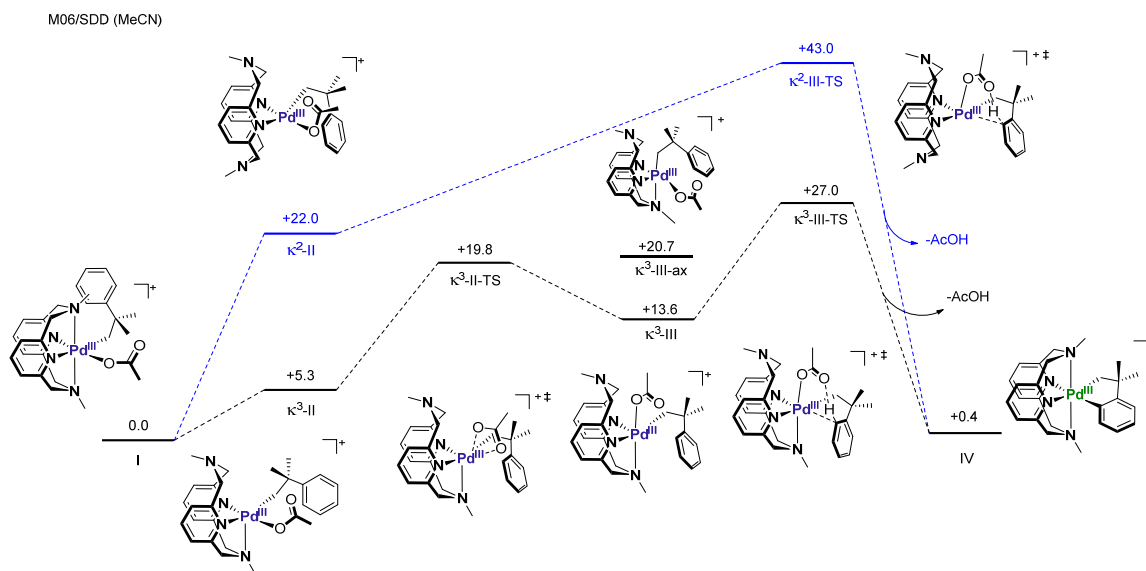

Figure S47. Calculated energy profiles for the conversion of **Int-B** (I) to 2<sup>+</sup> (IV) via two pathways involving either a  $\kappa^2$ - (blue line) or  $\kappa^3$ - (black line) Me<sup>c</sup>N4 ligand configuration. The free energy values are shown in kcal/mol. The energy of an alternate intermediate,  $\kappa^3$ -III-ax, with the neophyl ligand bound in an axial position is also shown to highlight the higher energy of such a rearranged ligand conformation.

**Cartesian coordinates (Å) and energies of optimized complexes obtained by DFT at the M06/SDD level of theory:**

I

Energy: -1584.175510 Hartrees

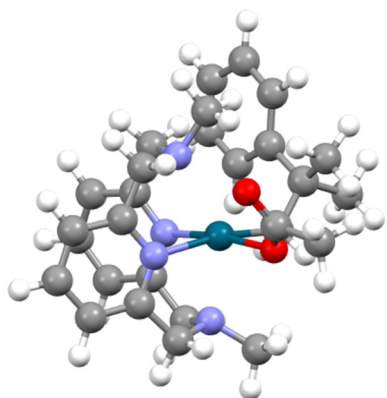

71

MeN4Pd<sup>III</sup>NeophylOAc

|    |           |           |          |
|----|-----------|-----------|----------|
| Pd | 13.053300 | 11.769600 | 2.504900 |
| N  | 11.416700 | 12.952300 | 3.009000 |
| N  | 11.535600 | 10.247200 | 2.834800 |
| N  | 12.929400 | 11.543100 | 4.965600 |
| N  | 11.880700 | 11.792000 | 0.465100 |
| C  | 10.538300 | 13.235500 | 2.013700 |
| C  | 9.282300  | 13.771700 | 2.311000 |
| H  | 8.592800  | 13.995600 | 1.504300 |
| C  | 8.932400  | 13.983600 | 3.651300 |
| H  | 7.959000  | 14.390100 | 3.903500 |
| C  | 9.832600  | 13.629100 | 4.664700 |
| H  | 9.576700  | 13.741300 | 5.712800 |
| C  | 11.079400 | 13.101700 | 4.314300 |
| C  | 12.104000 | 12.718600 | 5.347400 |
| H  | 12.793700 | 13.568200 | 5.465200 |
| H  | 11.608400 | 12.551900 | 6.317700 |
| C  | 12.225800 | 10.239000 | 5.155500 |
| H  | 11.771600 | 10.195500 | 6.158400 |
| H  | 13.005600 | 9.470000  | 5.085200 |
| C  | 11.197900 | 9.931400  | 4.103800 |
| C  | 9.967200  | 9.324800  | 4.383400 |
| H  | 9.707800  | 9.077100  | 5.407100 |
| C  | 9.085200  | 9.067500  | 3.324500 |
| H  | 8.122100  | 8.607000  | 3.517300 |
| C  | 9.439600  | 9.435900  | 2.017500 |

|   |           |           |           |
|---|-----------|-----------|-----------|
| H | 8.764700  | 9.276600  | 1.183400  |
| C | 10.681800 | 10.041500 | 1.804800  |
| C | 11.158200 | 10.483600 | 0.445700  |
| H | 11.867100 | 9.736500  | 0.066300  |
| H | 10.313300 | 10.529200 | -0.258100 |
| C | 10.974100 | 12.967500 | 0.594700  |
| H | 10.088500 | 12.847000 | -0.046900 |
| H | 11.522200 | 13.846100 | 0.231000  |
| C | 14.166100 | 11.508500 | 5.783000  |
| H | 14.809500 | 10.707400 | 5.407800  |
| H | 13.923700 | 11.322500 | 6.843700  |
| H | 14.687600 | 12.466800 | 5.709800  |
| C | 12.737000 | 11.908500 | -0.737800 |
| H | 13.266800 | 12.865200 | -0.723800 |
| H | 12.132500 | 11.850400 | -1.656500 |
| H | 13.470200 | 11.097000 | -0.732200 |
| C | 14.227400 | 13.361700 | 1.869300  |
| H | 14.763200 | 12.864700 | 1.047200  |
| H | 13.493300 | 14.070100 | 1.458600  |
| C | 15.244000 | 14.049800 | 2.783000  |
| C | 15.970100 | 15.104400 | 1.897600  |
| H | 16.477400 | 14.609500 | 1.058300  |
| H | 16.724100 | 15.639200 | 2.492400  |
| H | 15.264200 | 15.841000 | 1.491800  |
| C | 16.298400 | 13.026100 | 3.230600  |
| H | 15.870500 | 12.246600 | 3.871100  |
| H | 17.132700 | 13.502000 | 3.761800  |
| H | 16.713500 | 12.532800 | 2.341400  |
| C | 14.602200 | 14.823300 | 3.938800  |
| C | 15.224300 | 14.926100 | 5.199100  |
| H | 16.146700 | 14.387200 | 5.398500  |
| C | 14.675200 | 15.715900 | 6.222300  |
| H | 15.176700 | 15.771400 | 7.184600  |
| C | 13.487400 | 16.430900 | 6.006700  |
| H | 13.061000 | 17.042200 | 6.796800  |
| C | 12.863700 | 16.353500 | 4.750600  |
| H | 11.947000 | 16.906300 | 4.561100  |
| C | 13.418100 | 15.564300 | 3.733400  |
| H | 12.918000 | 15.534800 | 2.768000  |
| O | 14.570900 | 10.562900 | 1.743200  |
| C | 15.119800 | 9.570900  | 2.415200  |
| O | 14.817700 | 9.242000  | 3.597000  |
| C | 16.210000 | 8.845700  | 1.654000  |
| H | 17.125700 | 9.449300  | 1.682500  |
| H | 16.415200 | 7.875100  | 2.112200  |
| H | 15.929300 | 8.715000  | 0.604900  |

$\kappa^2$ -II

Energy: -1584.140509

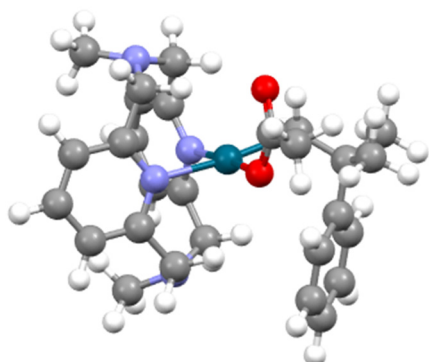

71

$\kappa^2$ -MeN4Pd<sup>III</sup>NeophylOAc-equatorial

|    |           |           |           |
|----|-----------|-----------|-----------|
| Pd | 10.269900 | 11.895500 | 2.724100  |
| N  | 11.865000 | 10.741000 | 1.876300  |
| N  | 11.820100 | 13.063200 | 3.402200  |
| N  | 12.201800 | 13.548600 | 0.139900  |
| N  | 12.465100 | 10.271900 | 5.098800  |
| C  | 12.444600 | 9.768300  | 2.630900  |
| C  | 13.560800 | 9.072300  | 2.147600  |
| H  | 13.996700 | 8.288900  | 2.759500  |
| C  | 14.086600 | 9.395300  | 0.891500  |
| H  | 14.949900 | 8.865600  | 0.503400  |
| C  | 13.480000 | 10.409100 | 0.141300  |
| H  | 13.852300 | 10.686700 | -0.839800 |
| C  | 12.362300 | 11.080400 | 0.655800  |
| C  | 11.701800 | 12.199000 | -0.132100 |
| H  | 11.872600 | 11.991200 | -1.197100 |
| H  | 10.616900 | 12.188000 | 0.047000  |
| C  | 11.650100 | 14.327400 | 1.252000  |
| H  | 10.567300 | 14.152400 | 1.302000  |
| H  | 11.804000 | 15.390400 | 1.023700  |
| C  | 12.297300 | 14.061800 | 2.601900  |
| C  | 13.410200 | 14.810200 | 3.005300  |
| H  | 13.759600 | 15.611700 | 2.362300  |
| C  | 14.043600 | 14.521500 | 4.218300  |
| H  | 14.903300 | 15.098200 | 4.541500  |
| C  | 13.549300 | 13.478300 | 5.007700  |
| H  | 14.007600 | 13.222600 | 5.957600  |
| C  | 12.433900 | 12.747500 | 4.580400  |
| C  | 11.910800 | 11.590600 | 5.412500  |

|   |           |           |           |
|---|-----------|-----------|-----------|
| H | 12.152900 | 11.811300 | 6.461200  |
| H | 10.817100 | 11.532600 | 5.323100  |
| C | 11.890400 | 9.473100  | 4.013800  |
| H | 10.799800 | 9.617400  | 4.013500  |
| H | 12.094900 | 8.416300  | 4.232700  |
| C | 13.892600 | 10.097400 | 5.343000  |
| H | 14.145900 | 10.515200 | 6.325300  |
| H | 14.542300 | 10.582200 | 4.591300  |
| H | 14.132100 | 9.026600  | 5.351000  |
| C | 8.421700  | 10.631000 | 5.363100  |
| C | 8.922400  | 9.814900  | 6.387400  |
| H | 9.090300  | 8.758100  | 6.197700  |
| C | 9.213300  | 10.359500 | 7.647800  |
| H | 9.600500  | 9.728700  | 8.442500  |
| C | 8.996700  | 11.728200 | 7.869300  |
| H | 9.216800  | 12.163600 | 8.840000  |
| C | 8.486200  | 12.541700 | 6.844700  |
| H | 8.316800  | 13.594300 | 7.051500  |
| C | 8.181900  | 12.005900 | 5.578100  |
| C | 7.640300  | 12.870400 | 4.431100  |
| C | 8.775800  | 13.314700 | 3.533800  |
| H | 9.501600  | 13.964000 | 4.037400  |
| H | 8.494700  | 13.617300 | 2.513800  |
| C | 6.511600  | 12.152300 | 3.671500  |
| H | 5.662000  | 11.986500 | 4.346300  |
| H | 6.820400  | 11.182500 | 3.271300  |
| H | 6.169800  | 12.775400 | 2.833800  |
| C | 7.042000  | 14.212200 | 4.945400  |
| H | 7.790400  | 14.857800 | 5.417900  |
| H | 6.247400  | 13.996800 | 5.672200  |
| H | 6.602000  | 14.761700 | 4.104500  |
| H | 8.216800  | 10.188800 | 4.390900  |
| O | 8.325100  | 12.129600 | 0.461900  |
| C | 8.147800  | 11.003000 | 1.006000  |
| O | 8.858200  | 10.597400 | 2.050000  |
| C | 7.106200  | 10.035100 | 0.514300  |
| H | 7.063500  | 9.140600  | 1.139000  |
| H | 6.128800  | 10.529800 | 0.512300  |
| H | 7.335700  | 9.748900  | -0.517700 |
| C | 13.603200 | 13.791600 | -0.183700 |
| H | 13.820700 | 13.382300 | -1.178100 |
| H | 13.790500 | 14.872500 | -0.208000 |
| H | 14.317500 | 13.341600 | 0.531000  |



$\kappa^3$ -II

Energy: -1584.708151 Hartrees

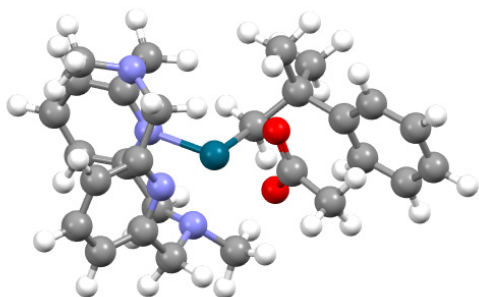

71

$\kappa^3$ -MeN4Pd<sup>III</sup>NeophylOAc-equatorial

|    |           |           |          |
|----|-----------|-----------|----------|
| Pd | 10.421400 | 11.851700 | 3.593400 |
| N  | 11.810000 | 10.796800 | 2.220100 |
| N  | 11.967500 | 13.235600 | 3.479000 |
| N  | 11.281000 | 13.396600 | 0.201500 |
| N  | 11.828100 | 10.908200 | 5.096300 |
| C  | 12.765600 | 10.105800 | 2.893100 |
| C  | 13.913700 | 9.636300  | 2.250000 |
| C  | 14.067700 | 9.882200  | 0.878300 |
| C  | 13.083700 | 10.609500 | 0.199600 |
| C  | 11.963200 | 11.082200 | 0.902100 |
| C  | 10.931300 | 11.970300 | 0.233900 |
| C  | 11.031300 | 14.212400 | 1.394100 |
| C  | 12.107400 | 14.127900 | 2.463200 |
| C  | 13.268700 | 14.909100 | 2.377800 |
| C  | 14.298800 | 14.726600 | 3.306800 |
| C  | 14.153300 | 13.760300 | 4.310200 |
| C  | 12.967600 | 13.026200 | 4.379200 |
| C  | 12.727500 | 12.032300 | 5.486400 |
| C  | 12.503100 | 9.805800  | 4.343600 |
| C  | 11.129100 | 10.325900 | 6.271900 |
| C  | 5.968700  | 11.844100 | 4.136300 |
| C  | 5.045900  | 10.839100 | 4.473500 |
| C  | 5.124700  | 10.189600 | 5.713200 |
| C  | 6.138400  | 10.559900 | 6.614500 |
| C  | 7.049300  | 11.567900 | 6.275500 |
| C  | 6.986700  | 12.226300 | 5.028400 |
| C  | 7.953700  | 13.375300 | 4.727900 |
| C  | 9.419700  | 13.008600 | 4.995000 |
| C  | 7.796700  | 13.943300 | 3.311200 |
| C  | 7.620500  | 14.524400 | 5.724300 |

|   |           |           |           |
|---|-----------|-----------|-----------|
| C | 12.447900 | 13.754400 | -0.598200 |
| H | 14.662600 | 9.091100  | 2.814700  |
| H | 14.945400 | 9.521800  | 0.352400  |
| H | 13.173100 | 10.824400 | -0.860700 |
| H | 10.816700 | 11.636900 | -0.806400 |
| H | 9.966500  | 11.849200 | 0.744600  |
| H | 10.066500 | 13.909300 | 1.820200  |
| H | 10.955600 | 15.260800 | 1.076900  |
| H | 13.350500 | 15.644200 | 1.584100  |
| H | 15.204900 | 15.319200 | 3.245300  |
| H | 14.938100 | 13.574700 | 5.035300  |
| H | 13.686200 | 11.644500 | 5.858100  |
| H | 12.241000 | 12.559900 | 6.316600  |
| H | 11.834200 | 8.937600  | 4.397800  |
| H | 13.439000 | 9.537200  | 4.854100  |
| H | 10.735900 | 11.119500 | 6.911300  |
| H | 11.827700 | 9.714700  | 6.861300  |
| H | 10.303400 | 9.703200  | 5.914300  |
| H | 5.883700  | 12.322700 | 3.165400  |
| H | 4.269400  | 10.564900 | 3.764100  |
| H | 4.412900  | 9.411800  | 5.974800  |
| H | 6.213400  | 10.068900 | 7.581200  |
| H | 7.819700  | 11.842100 | 6.994600  |
| H | 9.544600  | 12.450900 | 5.930800  |
| H | 10.028700 | 13.925500 | 5.024300  |
| H | 6.788300  | 14.351700 | 3.158300  |
| H | 7.985300  | 13.178400 | 2.544900  |
| H | 8.511300  | 14.767200 | 3.174100  |
| H | 7.800200  | 14.224000 | 6.764400  |
| H | 6.563600  | 14.808400 | 5.624500  |
| H | 8.238900  | 15.405400 | 5.506300  |
| H | 12.374800 | 13.267900 | -1.578900 |
| H | 12.464100 | 14.840400 | -0.753400 |
| H | 13.417000 | 13.462700 | -0.150400 |
| O | 8.223400  | 10.854100 | 1.777900  |
| C | 8.311300  | 10.061300 | 2.760000  |
| O | 9.109000  | 10.274700 | 3.790800  |
| C | 7.541400  | 8.765200  | 2.800000  |
| H | 7.380900  | 8.428800  | 3.827500  |
| H | 6.585100  | 8.877100  | 2.281800  |
| H | 8.122700  | 7.995700  | 2.276700  |

$\kappa^3$ -II-TS

Energy: -1584.144048 Hartrees

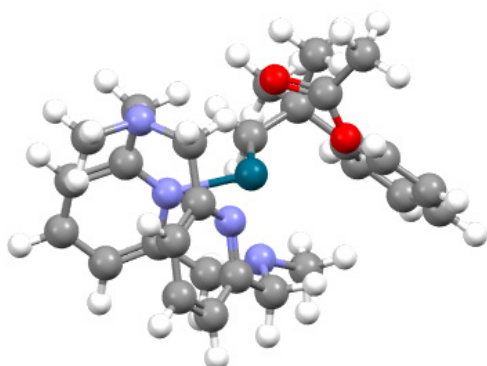

71

$\kappa^3$ -MeN4Pd<sup>III</sup>NeophylOAc-isomer-TS

|    |             |             |             |
|----|-------------|-------------|-------------|
| Pd | 11.14557900 | 11.75786700 | 3.28342800  |
| C  | 8.22298100  | 10.66409400 | 5.32936300  |
| C  | 7.94209100  | 9.62569600  | 6.22836900  |
| C  | 7.75972300  | 9.89145400  | 7.59585300  |
| C  | 7.85924700  | 11.21348500 | 8.05265400  |
| C  | 8.12300900  | 12.25641000 | 7.14878900  |
| C  | 8.30656200  | 12.00163300 | 5.77547200  |
| C  | 8.58426100  | 13.12220500 | 4.76770200  |
| C  | 10.05772100 | 13.20155300 | 4.33122300  |
| C  | 7.60501700  | 13.02123100 | 3.58444500  |
| C  | 8.35201600  | 14.52423300 | 5.39697400  |
| H  | 8.43145900  | 10.42275300 | 4.28027000  |
| H  | 7.87999300  | 8.60340500  | 5.86314000  |
| H  | 7.54474000  | 9.08422200  | 8.29054700  |
| H  | 7.72376200  | 11.43781900 | 9.10736500  |
| H  | 8.18079000  | 13.27090800 | 7.53213400  |
| H  | 10.70637600 | 13.36193100 | 5.20555400  |
| H  | 10.18214500 | 14.02142500 | 3.60478600  |
| H  | 6.58571300  | 13.23016700 | 3.93699900  |
| H  | 7.60405700  | 12.02936200 | 3.12711000  |
| H  | 7.86448000  | 13.75528500 | 2.81030800  |
| H  | 9.05877000  | 14.74655100 | 6.20594200  |
| H  | 7.33108500  | 14.58787900 | 5.79654800  |
| H  | 8.46356800  | 15.29648800 | 4.62563900  |
| N  | 12.75867000 | 10.57960800 | 2.25704400  |
| N  | 12.77653100 | 13.11931500 | 3.31508900  |
| N  | 12.69570600 | 13.05162500 | -0.02509900 |

|   |             |             |             |
|---|-------------|-------------|-------------|
| N | 12.24359800 | 10.97361300 | 5.05760600  |
| C | 13.52961400 | 9.93488700  | 3.17418500  |
| C | 14.80615300 | 9.46438900  | 2.86333600  |
| C | 15.29837200 | 9.66128400  | 1.56475600  |
| C | 14.50595900 | 10.33777700 | 0.63223500  |
| C | 13.23613200 | 10.81120000 | 1.00667500  |
| C | 12.38854400 | 11.61500600 | 0.03948100  |
| C | 12.19961500 | 13.93549700 | 1.03818900  |
| C | 13.07295900 | 13.94855300 | 2.28101600  |
| C | 14.22914300 | 14.73998100 | 2.34189200  |
| C | 15.09545900 | 14.62320800 | 3.43532200  |
| C | 14.79488600 | 13.71305500 | 4.45535200  |
| C | 13.61290500 | 12.97262900 | 4.37263800  |
| C | 13.20498200 | 12.03952300 | 5.47857800  |
| C | 12.91497300 | 9.73689500  | 4.52798200  |
| C | 11.40375900 | 10.57551600 | 6.22092000  |
| C | 13.99201000 | 13.40285600 | -0.59831900 |
| H | 15.39340200 | 8.95866900  | 3.62193600  |
| H | 16.28373600 | 9.30014100  | 1.29076900  |
| H | 14.85304300 | 10.50573500 | -0.38237400 |
| H | 12.54330000 | 11.20598500 | -0.96768400 |
| H | 11.33199200 | 11.50067100 | 0.30415300  |
| H | 11.17532800 | 13.63588700 | 1.29461200  |
| H | 12.16960200 | 14.95765800 | 0.63883600  |
| H | 14.43943200 | 15.42648800 | 1.52835600  |
| H | 15.99796800 | 15.22229000 | 3.48485100  |
| H | 15.45210500 | 13.57540400 | 5.30705300  |
| H | 14.09384900 | 11.57864100 | 5.93096000  |
| H | 12.71490300 | 12.63153600 | 6.26171700  |
| H | 12.13516200 | 8.96785100  | 4.45502900  |
| H | 13.66584500 | 9.39583000  | 5.25367800  |
| H | 10.85903700 | 11.44219300 | 6.60383900  |
| H | 12.04770800 | 10.16973700 | 7.01526700  |
| H | 10.68998100 | 9.81069800  | 5.90555400  |
| H | 14.13333100 | 12.84937000 | -1.53486200 |
| H | 14.01139400 | 14.47625400 | -0.82515600 |
| H | 14.85611600 | 13.18164700 | 0.05644900  |
| O | 9.46559300  | 11.86667100 | 1.20642100  |
| C | 8.90724800  | 10.75245500 | 1.53395100  |
| O | 9.20244100  | 10.11338900 | 2.62363000  |
| C | 7.81795000  | 10.19682300 | 0.64970100  |
| H | 7.70399000  | 9.12024500  | 0.79689600  |
| H | 6.87091600  | 10.68513000 | 0.91408900  |
| H | 8.02721600  | 10.41478600 | -0.40098500 |

$\kappa^3$ -III

Energy: -1584.153779 Hartrees

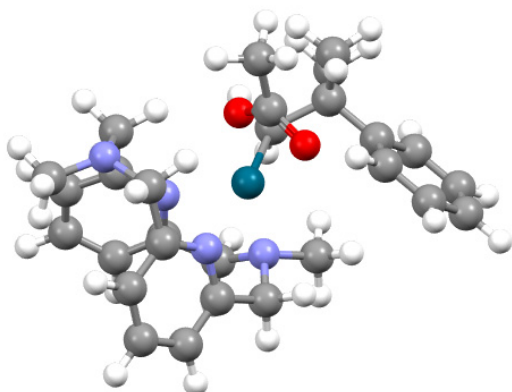

71

$\kappa^3$ -MeN4Pd<sup>III</sup>NeophylOAc-axial

|    |           |           |           |
|----|-----------|-----------|-----------|
| Pd | 10.053600 | 11.876800 | 3.436400  |
| C  | 7.428800  | 10.529700 | 5.054700  |
| C  | 7.269600  | 9.328400  | 5.757800  |
| C  | 7.003500  | 9.344000  | 7.137300  |
| C  | 6.897700  | 10.576700 | 7.797000  |
| C  | 7.054300  | 11.779100 | 7.086000  |
| C  | 7.327100  | 11.779500 | 5.705600  |
| C  | 7.494600  | 13.071700 | 4.895800  |
| C  | 8.942400  | 13.319200 | 4.424200  |
| C  | 6.483300  | 13.069800 | 3.731800  |
| C  | 7.183300  | 14.330800 | 5.744000  |
| H  | 7.643400  | 10.482700 | 3.985500  |
| H  | 7.353100  | 8.381900  | 5.230000  |
| H  | 6.877200  | 8.413900  | 7.683900  |
| H  | 6.687200  | 10.607500 | 8.862600  |
| H  | 6.963100  | 12.715400 | 7.628200  |
| H  | 9.599800  | 13.561500 | 5.271600  |
| H  | 8.965700  | 14.126300 | 3.677300  |
| H  | 5.463500  | 13.117500 | 4.138100  |
| H  | 6.551000  | 12.169700 | 3.113700  |
| H  | 6.642800  | 13.943800 | 3.086500  |
| H  | 7.868700  | 14.439700 | 6.594000  |
| H  | 6.154100  | 14.290500 | 6.124800  |
| H  | 7.275600  | 15.227000 | 5.117000  |
| N  | 11.669500 | 10.573600 | 2.455600  |
| N  | 11.836000 | 13.224600 | 3.170000  |
| N  | 11.739700 | 12.770700 | -0.148300 |

|   |           |           |           |
|---|-----------|-----------|-----------|
| N | 11.190000 | 11.328700 | 5.186700  |
| C | 12.420200 | 10.024800 | 3.450900  |
| C | 13.706600 | 9.531900  | 3.228000  |
| C | 14.240500 | 9.608100  | 1.933200  |
| C | 13.473700 | 10.186400 | 0.918000  |
| C | 12.188200 | 10.681700 | 1.205200  |
| C | 11.377400 | 11.373000 | 0.123900  |
| C | 11.324400 | 13.810900 | 0.804900  |
| C | 12.201100 | 13.886800 | 2.041600  |
| C | 13.433000 | 14.560400 | 1.992400  |
| C | 14.316600 | 14.475800 | 3.073500  |
| C | 13.952100 | 13.718800 | 4.192200  |
| C | 12.691900 | 13.114500 | 4.217700  |
| C | 12.236600 | 12.374000 | 5.441000  |
| C | 11.781400 | 9.993100  | 4.805500  |
| C | 10.442000 | 11.123800 | 6.466100  |
| C | 13.015700 | 12.982500 | -0.826400 |
| H | 14.271000 | 9.106500  | 4.050700  |
| H | 15.235600 | 9.229900  | 1.725500  |
| H | 13.850700 | 10.257600 | -0.097400 |
| H | 11.513800 | 10.814700 | -0.811500 |
| H | 10.321500 | 11.333700 | 0.395800  |
| H | 10.284700 | 13.625300 | 1.091100  |
| H | 11.383700 | 14.775800 | 0.285400  |
| H | 13.686300 | 15.131600 | 1.105200  |
| H | 15.277400 | 14.977700 | 3.038900  |
| H | 14.618000 | 13.601700 | 5.040500  |
| H | 13.095100 | 11.912600 | 5.948400  |
| H | 11.802900 | 13.100600 | 6.139500  |
| H | 10.948600 | 9.277000  | 4.802700  |
| H | 12.502800 | 9.688100  | 5.575000  |
| H | 9.946600  | 12.050300 | 6.764700  |
| H | 11.152800 | 10.826100 | 7.250000  |
| H | 9.694800  | 10.338000 | 6.334900  |
| H | 13.085800 | 12.300100 | -1.682700 |
| H | 13.058600 | 14.012600 | -1.201800 |
| H | 13.909200 | 12.818500 | -0.196000 |
| O | 8.829200  | 12.330400 | 1.807800  |
| C | 8.075400  | 11.357600 | 1.321300  |
| O | 8.035500  | 10.195000 | 1.813500  |
| C | 7.271500  | 11.752200 | 0.107800  |
| H | 6.663400  | 10.914900 | -0.240600 |
| H | 6.625100  | 12.603100 | 0.350600  |
| H | 7.949400  | 12.073500 | -0.692500 |

$\kappa^3$ -III-ax

Energy: -1584.142494 Hartrees

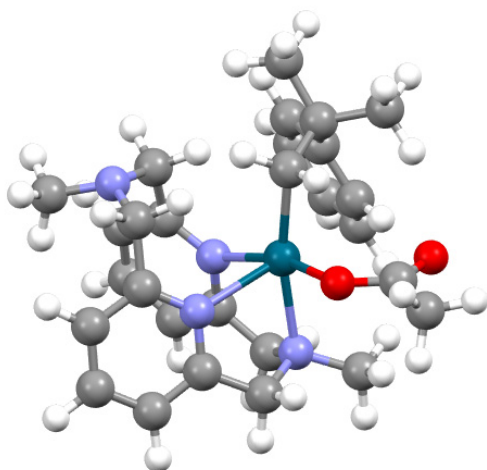

71

$\kappa^3$ -MeN4Pd<sup>III</sup>OAcNeophyl-axial

|    |           |           |          |
|----|-----------|-----------|----------|
| Pd | 10.032700 | 11.468800 | 3.398300 |
| C  | 8.480500  | 13.255300 | 4.670400 |
| C  | 9.084600  | 13.935800 | 5.739900 |
| C  | 9.506900  | 15.263200 | 5.580100 |
| C  | 9.316500  | 15.902900 | 4.343000 |
| C  | 8.705300  | 15.226300 | 3.274100 |
| C  | 8.278400  | 13.897100 | 3.422800 |
| H  | 9.214000  | 13.434300 | 6.696200 |
| H  | 9.970700  | 15.795200 | 6.405400 |
| H  | 9.639500  | 16.931900 | 4.211100 |
| H  | 8.566700  | 15.745900 | 2.329900 |
| C  | 7.622400  | 13.081500 | 2.304800 |
| C  | 8.531000  | 11.880000 | 1.940200 |
| C  | 6.254000  | 12.562200 | 2.796600 |
| C  | 7.363900  | 13.913600 | 1.037100 |
| H  | 9.007500  | 12.002200 | 0.966200 |
| H  | 7.991400  | 10.926100 | 1.962300 |
| H  | 5.614000  | 13.401800 | 3.101000 |
| H  | 6.358600  | 11.875100 | 3.644700 |
| H  | 5.751300  | 12.022800 | 1.982200 |
| H  | 8.280700  | 14.337600 | 0.609000 |
| H  | 6.672200  | 14.739800 | 1.252000 |
| H  | 6.900800  | 13.275400 | 0.273700 |
| H  | 8.105400  | 12.233600 | 4.793500 |
| N  | 11.919100 | 10.484200 | 2.386700 |

|   |           |           |           |
|---|-----------|-----------|-----------|
| N | 11.544000 | 13.036300 | 3.338100  |
| N | 11.748300 | 12.869400 | -0.007300 |
| N | 11.255300 | 10.862700 | 5.173200  |
| C | 12.715000 | 9.963900  | 3.361000  |
| C | 14.053600 | 9.642900  | 3.118800  |
| C | 14.584900 | 9.856400  | 1.840400  |
| C | 13.764400 | 10.408200 | 0.853400  |
| C | 12.431300 | 10.738700 | 1.157200  |
| C | 11.567300 | 11.415800 | 0.112300  |
| C | 11.137200 | 13.765000 | 0.983500  |
| C | 11.877200 | 13.858300 | 2.299800  |
| C | 12.955600 | 14.749600 | 2.403000  |
| C | 13.751700 | 14.757900 | 3.551100  |
| C | 13.458200 | 13.847700 | 4.568800  |
| C | 12.352300 | 13.001000 | 4.440000  |
| C | 12.038600 | 12.063200 | 5.571100  |
| C | 12.096800 | 9.721900  | 4.706900  |
| C | 10.454100 | 10.406100 | 6.342500  |
| C | 13.037500 | 13.304500 | -0.540700 |
| H | 14.656700 | 9.233900  | 3.922300  |
| H | 15.617700 | 9.605700  | 1.623900  |
| H | 14.134700 | 10.586300 | -0.151200 |
| H | 11.815800 | 10.980800 | -0.864400 |
| H | 10.519000 | 11.190200 | 0.319000  |
| H | 10.113300 | 13.450100 | 1.168300  |
| H | 11.105100 | 14.769400 | 0.541000  |
| H | 13.159800 | 15.416400 | 1.571600  |
| H | 14.591200 | 15.438400 | 3.640400  |
| H | 14.068700 | 13.783300 | 5.463000  |
| H | 12.972000 | 11.763500 | 6.071300  |
| H | 11.443600 | 12.612800 | 6.312400  |
| H | 11.432600 | 8.851200  | 4.638200  |
| H | 12.878000 | 9.500300  | 5.448600  |
| H | 9.742500  | 11.183500 | 6.630700  |
| H | 11.120800 | 10.189700 | 7.191600  |
| H | 9.907200  | 9.495700  | 6.086900  |
| H | 13.278400 | 12.712400 | -1.432100 |
| H | 12.969800 | 14.359800 | -0.833100 |
| H | 13.880900 | 13.205900 | 0.168000  |
| O | 9.047400  | 9.659200  | 3.571200  |
| C | 8.008200  | 9.400800  | 4.351200  |
| O | 7.386700  | 10.260400 | 5.033300  |
| C | 7.643400  | 7.934300  | 4.390100  |
| H | 8.429900  | 7.384600  | 4.921900  |
| H | 6.692600  | 7.791700  | 4.908200  |
| H | 7.583400  | 7.527900  | 3.376300  |



$\kappa^2$ -TS

Energy: -1584.10696 Hartrees

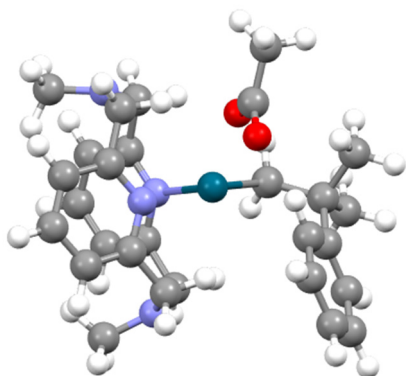

71

$\kappa^2$ -MeN4Pd<sup>III</sup>NeophylOAc-TS

|    |           |           |           |
|----|-----------|-----------|-----------|
| Pd | 10.238900 | 12.094800 | 2.803200  |
| N  | 11.903900 | 10.803700 | 1.858100  |
| N  | 11.948100 | 13.289500 | 3.321300  |
| N  | 12.375600 | 13.525800 | -0.007000 |
| N  | 12.559700 | 10.516600 | 5.160900  |
| C  | 12.474400 | 9.870000  | 2.687000  |
| C  | 13.577400 | 9.103800  | 2.275600  |
| H  | 13.993400 | 8.363400  | 2.949900  |
| C  | 14.122000 | 9.314300  | 0.996400  |
| H  | 14.959900 | 8.719600  | 0.653000  |
| C  | 13.563300 | 10.310600 | 0.170100  |
| H  | 13.974700 | 10.513300 | -0.808800 |
| C  | 12.451100 | 11.049100 | 0.621800  |
| C  | 11.861400 | 12.160700 | -0.246300 |
| H  | 12.063100 | 11.913000 | -1.297100 |
| H  | 10.790200 | 12.186200 | -0.114000 |
| C  | 11.792700 | 14.368200 | 1.059100  |
| H  | 10.722600 | 14.166800 | 1.114100  |
| H  | 11.926800 | 15.415700 | 0.762500  |
| C  | 12.433200 | 14.213700 | 2.445400  |
| C  | 13.573900 | 14.966400 | 2.783000  |
| H  | 13.931800 | 15.724700 | 2.080400  |
| C  | 14.242000 | 14.717300 | 3.989900  |
| H  | 15.176500 | 15.229500 | 4.225900  |
| C  | 13.745400 | 13.736100 | 4.861600  |
| H  | 14.237000 | 13.514100 | 5.802200  |
| C  | 12.583800 | 13.022400 | 4.510800  |
| C  | 12.065900 | 11.888500 | 5.454900  |

|   |           |           |           |
|---|-----------|-----------|-----------|
| H | 12.404200 | 12.134800 | 6.408700  |
| H | 10.983300 | 11.854300 | 5.446400  |
| C | 11.920500 | 9.695600  | 4.099700  |
| H | 10.849200 | 9.917000  | 4.110500  |
| H | 12.034300 | 8.640500  | 4.376400  |
| C | 13.996800 | 10.265000 | 5.378300  |
| H | 14.293700 | 10.704300 | 6.342100  |
| H | 14.650200 | 10.691900 | 4.598500  |
| H | 14.177800 | 9.186300  | 5.419900  |
| C | 7.956800  | 10.433800 | 3.962800  |
| C | 8.017900  | 9.072400  | 4.319300  |
| H | 8.181800  | 8.326500  | 3.547500  |
| C | 7.822100  | 8.671700  | 5.660800  |
| H | 7.818600  | 7.618600  | 5.932400  |
| C | 7.605300  | 9.660200  | 6.642400  |
| H | 7.436200  | 9.369700  | 7.677300  |
| C | 7.591900  | 11.028000 | 6.295100  |
| H | 7.426500  | 11.759200 | 7.081700  |
| C | 7.763000  | 11.441000 | 4.950000  |
| C | 7.697900  | 12.917300 | 4.504100  |
| C | 9.047900  | 13.409900 | 3.922700  |
| H | 9.752400  | 13.645500 | 4.720900  |
| H | 8.923400  | 14.262000 | 3.242200  |
| C | 6.533600  | 13.092300 | 3.485200  |
| H | 6.448900  | 14.140000 | 3.170500  |
| H | 5.584100  | 12.796000 | 3.945500  |
| H | 6.670800  | 12.475600 | 2.583100  |
| C | 7.432600  | 13.884400 | 5.699400  |
| H | 8.210200  | 13.820700 | 6.444000  |
| H | 6.479700  | 13.673300 | 6.168300  |
| H | 7.416000  | 14.923400 | 5.331700  |
| H | 8.018100  | 10.682400 | 2.907800  |
| C | 13.789200 | 13.748300 | -0.334600 |
| H | 14.002500 | 13.305600 | -1.315600 |
| H | 13.987000 | 14.825500 | -0.391900 |
| H | 14.496100 | 13.313500 | 0.396100  |
| O | 9.058900  | 12.783500 | 1.185400  |
| C | 8.423200  | 11.894200 | 0.402900  |
| O | 8.394400  | 10.638700 | 0.645000  |
| C | 7.714400  | 12.512500 | -0.803100 |
| H | 8.287600  | 13.347200 | -1.226500 |
| H | 7.550200  | 11.745300 | -1.573600 |
| H | 6.730700  | 12.897500 | -0.479000 |

$\kappa^3$ -III-TS

Energy: -1584.132486 Hartrees

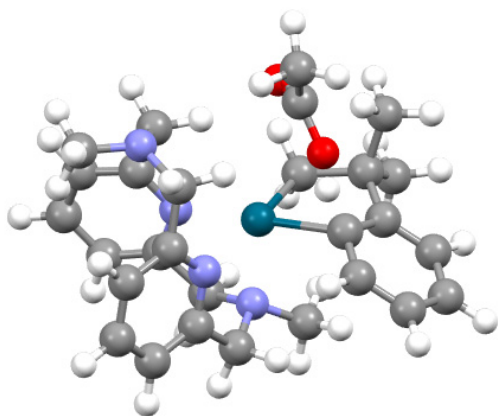

71

$\kappa^3$ -MeN4Pd<sup>III</sup>NeophylOAc-TS

|    |           |           |          |
|----|-----------|-----------|----------|
| Pd | 10.121700 | 12.135300 | 3.649600 |
| C  | 8.300700  | 11.110900 | 4.157600 |
| C  | 8.297800  | 9.695200  | 4.249100 |
| C  | 7.595900  | 9.042400  | 5.266300 |
| C  | 6.898400  | 9.808800  | 6.220300 |
| C  | 6.915600  | 11.212200 | 6.170400 |
| C  | 7.619400  | 11.873000 | 5.153100 |
| C  | 7.711400  | 13.382600 | 5.027200 |
| C  | 9.130600  | 13.726400 | 4.526000 |
| C  | 6.641500  | 13.854100 | 4.021400 |
| C  | 7.473100  | 14.112400 | 6.360500 |
| H  | 8.818300  | 9.117900  | 3.485800 |
| H  | 7.578300  | 7.958100  | 5.318800 |
| H  | 6.345600  | 9.307900  | 7.010300 |
| H  | 6.388800  | 11.780000 | 6.933200 |
| H  | 9.803100  | 14.004800 | 5.349800 |
| H  | 9.135800  | 14.502700 | 3.746700 |
| H  | 5.641200  | 13.548900 | 4.358000 |
| H  | 6.827200  | 13.446100 | 3.021200 |
| H  | 6.663600  | 14.950500 | 3.947700 |
| H  | 8.147300  | 13.748800 | 7.147900 |
| H  | 6.437300  | 13.986000 | 6.702700 |
| H  | 7.650800  | 15.187300 | 6.225000 |
| N  | 11.450600 | 10.565300 | 2.810000 |
| N  | 11.914900 | 13.223900 | 3.332600 |
| N  | 11.453500 | 12.522500 | 0.086300 |
| N  | 11.282500 | 11.515800 | 5.511400 |

|   |           |           |           |
|---|-----------|-----------|-----------|
| C | 12.237400 | 9.988100  | 3.755600  |
| C | 13.363600 | 9.237900  | 3.409000  |
| C | 13.675100 | 9.075000  | 2.051800  |
| C | 12.866900 | 9.687000  | 1.087400  |
| C | 11.762700 | 10.453600 | 1.493900  |
| C | 10.916800 | 11.217200 | 0.493900  |
| C | 11.276200 | 13.676400 | 0.979600  |
| C | 12.265400 | 13.746000 | 2.127300  |
| C | 13.548300 | 14.283300 | 1.945000  |
| C | 14.478900 | 14.229700 | 2.988700  |
| C | 14.111600 | 13.636600 | 4.203100  |
| C | 12.813000 | 13.143400 | 4.349400  |
| C | 12.347400 | 12.556800 | 5.653100  |
| C | 11.810700 | 10.152700 | 5.187400  |
| C | 10.488200 | 11.444500 | 6.766300  |
| C | 12.701200 | 12.486700 | -0.671800 |
| H | 13.974900 | 8.794000  | 4.187300  |
| H | 14.538300 | 8.489500  | 1.754200  |
| H | 13.079200 | 9.583000  | 0.028100  |
| H | 10.816200 | 10.604200 | -0.411900 |
| H | 9.920000  | 11.363400 | 0.927200  |
| H | 10.244500 | 13.663400 | 1.358900  |
| H | 11.402700 | 14.583100 | 0.372600  |
| H | 13.801500 | 14.728300 | 0.988000  |
| H | 15.477500 | 14.631300 | 2.855500  |
| H | 14.810400 | 13.555400 | 5.028500  |
| H | 13.200300 | 12.140000 | 6.207300  |
| H | 11.928100 | 13.366600 | 6.263600  |
| H | 10.998400 | 9.442700  | 5.390900  |
| H | 12.642000 | 9.913800  | 5.865700  |
| H | 10.049300 | 12.421900 | 6.984500  |
| H | 11.142100 | 11.150800 | 7.601200  |
| H | 9.691400  | 10.703900 | 6.659200  |
| H | 12.621600 | 11.732400 | -1.464500 |
| H | 12.869700 | 13.464400 | -1.140200 |
| H | 13.595900 | 12.245800 | -0.066900 |
| O | 8.098100  | 13.459300 | 1.028700  |
| C | 7.640400  | 12.305400 | 0.764600  |
| O | 7.639300  | 11.302200 | 1.613900  |
| C | 7.101200  | 11.987200 | -0.613600 |
| H | 6.253200  | 11.299600 | -0.552300 |
| H | 6.810200  | 12.902300 | -1.135700 |
| H | 7.893400  | 11.493400 | -1.192300 |
| H | 8.127400  | 11.427100 | 2.938200  |

#### IV

Energy (+ AcOH): -1584.174858 Hartrees

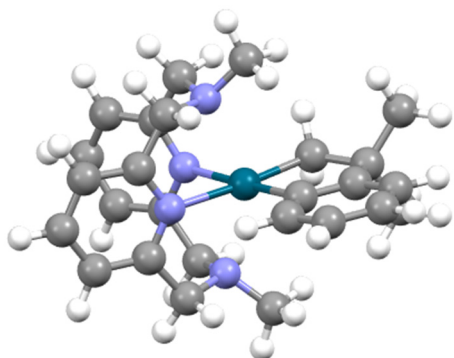

63

MeN4Pd<sup>III</sup>Cycloneophyl

|    |           |           |           |
|----|-----------|-----------|-----------|
| Pd | 10.359900 | 11.731500 | 3.482400  |
| N  | 11.994500 | 10.621500 | 2.579200  |
| N  | 11.921000 | 13.216800 | 3.413100  |
| N  | 10.321000 | 12.457700 | 1.185600  |
| N  | 11.779500 | 11.153000 | 5.366500  |
| C  | 12.959200 | 10.138900 | 3.396100  |
| C  | 14.203600 | 9.756300  | 2.881900  |
| H  | 14.967300 | 9.368700  | 3.547800  |
| C  | 14.441100 | 9.907300  | 1.507800  |
| H  | 15.400700 | 9.626100  | 1.087200  |
| C  | 13.445600 | 10.455500 | 0.685700  |
| H  | 13.614800 | 10.617300 | -0.373600 |
| C  | 12.220800 | 10.815300 | 1.259000  |
| C  | 11.086100 | 11.406200 | 0.458000  |
| H  | 11.466500 | 11.795800 | -0.499400 |
| H  | 10.376800 | 10.600000 | 0.227700  |
| C  | 11.007500 | 13.779800 | 1.225000  |
| H  | 10.251100 | 14.522700 | 1.509900  |
| H  | 11.381400 | 14.054100 | 0.226100  |
| C  | 12.130900 | 13.842400 | 2.229600  |
| C  | 13.332500 | 14.513800 | 1.980600  |
| H  | 13.487100 | 15.006300 | 1.026500  |
| C  | 14.326400 | 14.510600 | 2.969900  |
| H  | 15.271000 | 15.014600 | 2.794900  |
| C  | 14.107500 | 13.821800 | 4.171800  |
| H  | 14.871200 | 13.771200 | 4.940600  |
| C  | 12.884500 | 13.169400 | 4.363200  |
| C  | 12.559400 | 12.397800 | 5.617300  |
| H  | 13.485500 | 12.172700 | 6.169500  |

|   |           |           |           |
|---|-----------|-----------|-----------|
| H | 11.939000 | 13.037400 | 6.259400  |
| C | 12.604800 | 10.021300 | 4.857500  |
| H | 12.007200 | 9.109100  | 4.990000  |
| H | 13.520600 | 9.908200  | 5.459000  |
| C | 8.959700  | 12.592100 | 0.620900  |
| H | 8.443700  | 11.628500 | 0.683200  |
| H | 8.992500  | 12.915200 | -0.432200 |
| H | 8.395000  | 13.330600 | 1.199500  |
| C | 11.051100 | 10.745300 | 6.589000  |
| H | 10.415000 | 11.570200 | 6.924900  |
| H | 11.748000 | 10.480600 | 7.401400  |
| H | 10.419700 | 9.879100  | 6.366000  |
| C | 8.876800  | 10.362000 | 3.493800  |
| C | 9.022900  | 9.054200  | 2.987000  |
| H | 9.988600  | 8.715400  | 2.612200  |
| C | 7.927800  | 8.170900  | 2.955900  |
| H | 8.053300  | 7.164800  | 2.562300  |
| C | 6.674200  | 8.590600  | 3.432000  |
| H | 5.825800  | 7.911600  | 3.406500  |
| C | 6.522100  | 9.888600  | 3.946000  |
| H | 5.550700  | 10.208900 | 4.322800  |
| C | 7.613300  | 10.777300 | 3.981400  |
| C | 7.523200  | 12.172500 | 4.568500  |
| C | 8.849100  | 12.919000 | 4.251700  |
| H | 9.254000  | 13.430700 | 5.141200  |
| H | 8.703300  | 13.667900 | 3.454000  |
| C | 6.338000  | 12.960200 | 3.977600  |
| H | 5.376300  | 12.489400 | 4.223800  |
| H | 6.419100  | 13.025100 | 2.883200  |
| H | 6.326800  | 13.982200 | 4.382600  |
| C | 7.330000  | 12.064300 | 6.094400  |
| H | 8.163000  | 11.515500 | 6.555400  |
| H | 6.397900  | 11.535300 | 6.338000  |
| H | 7.282600  | 13.065700 | 6.545600  |

## IX. References

1. Bottino, F.; Di Grazia, M.; Finocchiaro, P.; Fronczek, F. R.; Mamo, A.; Pappalardo, S., Reaction of Tosylamide Monosodium Salt with Bis(halomethyl) Compounds: an Easy Entry to Symmetrical N-tosylazamacrocycles. *Journal of Organic Chemistry* **1988**, *53* (15), 3521-9.
2. Smith T. W, J., .Sellas T. J. , Neophyl Chloride. *Org. Synth. Coll.* **1952**, *32*, 90.
3. Gutiérrez, E.; Nicasio, M. C.; Paneque, M.; Ruiz, C.; Salazar, V., Synthesis and reactivity of new palladium alkyl complexes containing PMe<sub>3</sub> ligands: Insertion reactions and formation of bis(pyrazolyl)borate derivatives. *J. Organomet. Chem.* **1997**, *549* (1–2), 167-176.
4. Campora, J.; Lopez, J. A.; Palma, P.; del Rio, D.; Carmona, E.; Valerga, P.; Graiff, C.; Tiripicchio, A., Synthesis and Insertion Reactions of the Cyclometalated Palladium<sup>II</sup> Alkyl Complexes Pd(CH<sub>2</sub>CMe<sub>2</sub>-o-C<sub>6</sub>H<sub>4</sub>)L<sub>2</sub>. Observation of a Pentacoordinated Intermediate in the Insertion of SO<sub>2</sub>. *Inorg. Chem.* **2001**, *40* (17), 4116-4126.
5. Endo, K.; Grubbs, R. H., Chelated Ruthenium Catalysts for Z-Selective Olefin Metathesis. *J. Am. Chem. Soc.* **2011**, *133* (22), 8525-8527.
6. Gottlieb, H. E.; Kotlyar, V.; Nudelman, A., NMR Chemical Shifts of Common Laboratory Solvents as Trace Impurities. *Journal of Organic Chemistry* **1997**, *62* (21), 7512-7515.
7. Tang, F.; Zhang, Y.; Rath, N. P.; Mirica, L. M., Detection of Pd(III) and Pd(IV) Intermediates during the Aerobic Oxidative C-C Bond Formation from a Pd(II) Dimethyl Complex. *Organometallics* **2012**, *31* (18), 6690-6696.
8. Gaussian 16, Revision C.01, Frisch, M. J.; Trucks, G. W.; Schlegel, H. B.; Scuseria, G. E.; Robb, M. A.; Cheeseman, J. R.; Scalmani, G.; Barone, V.; Petersson, G. A.; Nakatsuji, H.; Li, X.; Caricato, M.; Marenich, A. V.; Bloino, J.; Janesko, B. G.; Gomperts, R.; Mennucci, B.; Hratchian, H. P.; Ortiz, J. V.; Izmaylov, A. F.; Sonnenberg, J. L.; Williams-Young, D.; Ding, F.; Lipparini, F.; Egidi, F.; Goings, J.; Peng, B.; Petrone, A.; Henderson, T.; Ranasinghe, D.; Zakrzewski, V. G.; Gao, J.; Rega, N.; Zheng, G.; Liang, W.; Hada, M.; Ehara, M.; Toyota, K.; Fukuda, R.; Hasegawa, J.; Ishida, M.; Nakajima, T.; Honda, Y.; Kitao, O.; Nakai, H.; Vreven, T.; Throssell, K.; Montgomery, J. A., Jr.; Peralta, J. E.; Ogliaro, F.; Bearpark, M. J.; Heyd, J. J.; Brothers, E. N.; Kudin, K. N.; Staroverov, V. N.; Keith, T. A.; Kobayashi, R.; Normand, J.; Raghavachari, K.; Rendell, A. P.; Burant, J. C.; Iyengar, S. S.; Tomasi, J.; Cossi, M.; Millam, J. M.; Klene, M.; Adamo, C.; Cammi, R.; Ochterski, J. W.; Martin, R. L.; Morokuma, K.; Farkas, O.; Foresman, J. B.; Fox, D. J. Gaussian, Inc., Wallingford CT, 2016.
9. Zhao, Y.; Truhlar, D. G., The M06 suite of density functionals for main group thermochemistry, thermochemical kinetics, noncovalent interactions, excited states, and transition elements: two new functionals and systematic testing of four M06-class functionals and 12 other functionals. *Theor. Chem. Acc.* **2008**, *120* (1-3), 215-241.
10. Andrae, D.; Haussermann, U.; Dolg, M.; Stoll, H.; Preuss, H., Energy-Adjusted Abinitio Pseudopotentials for the 2nd and 3rd Row Transition-Elements. *Theor. Chim. Acta* **1990**, *77* (2), 123-141.
11. Marenich, A. V.; Cramer, C. J.; Truhlar, D. G., Universal Solvation Model Based on Solute Electron Density and on a Continuum Model of the Solvent Defined by the Bulk Dielectric Constant and Atomic Surface Tensions. *J. Phys. Chem. B* **2009**, *113* (18), 6378-6396.
